# Supplementary material
Source: Research Square preprint supplement (doi:10.21203/rs.3.rs-10159812/v1)
Supplement: Supplementary file 1 [file 0a6092ddae0c2cb0543f7b08.xlsx]

## Sheet: Summary
S1 Dataset. Sequential in silico filtering of GIPR missense variants
Each subsequent sheet lists the variants surviving the corresponding step. Canonical GIPR transcript; GRCh38 coordinates. Counts correspond to Fig 1 and Table 1.
Step	Filter / tool	Threshold applied	Variants entering	Removed	Variants retained
1	PolyPhen-2	probability ≥ 0.9	893	413	480
2	gnomAD v4.1.1 allele frequency	MAF < 0.005 and AF available	480	83	397
3	SIFT 4G	score < 0.05	397	144	253
4	PROVEAN	score ≤ −2.5	253	19	234
5	AlphaMissense	score ≥ 0.564	234	89	145
6	MetaRNN	score ≥ 0.5	145	5	140
7	REVEL	score ≥ 0.5	140	36	104
8	mCSM-membrane (pathogenicity)	classified Pathogenic	104	25	79
9	mCSM-membrane (stability)	ΔΔG ≤ −1.0 kcal/mol	79	65	14
Note: at the allele-frequency step, 4 variants were removed for MAF ≥ 0.005 and 79 for lacking a gnomAD v4.1.1 allele frequency (4 + 79 = 83 removed; 397 retained).

## Sheet: 0. Input scored (893)
Input scored (893)
Variants surviving this step (cumulative scores for all filters applied through this point).
No.	dbSNP rsID	Amino acid change	PolyPhen-2
1	rs143490173	Asp66Gly	1
2	rs143490173	Asp66Val	0.999
3	rs199871847	Ser447Thr	0.18
4	rs200958147	Ser415Asn	0.475
5	rs200958147	Ser415Ile	0.014
6	rs201980985	Cys286Arg	1
7	rs373040041	Leu304Pro	1
8	rs373040041	Leu304Arg	1
9	rs374247187	Gln8Lys	0.002
10	rs374247187	Gln8Glu	0
11	rs376471889	Met305Leu	0
12	rs376471889	Met305Val	0
13	rs750443279	Gly17Arg	0.019
14	rs750443279	Gly17Arg	0.019
15	rs756277634	Leu261His	0.999
16	rs756277634	Leu261Pro	0.997
17	rs764416244	Met140Lys	0.531
18	rs764416244	Met140Thr	0.928
19	rs764416244	Met140Arg	0.895
20	rs766119961	Arg404Ser	1
21	rs769250990	Thr31Lys	0.373
22	rs769250990	Thr31Arg	0.807
23	rs769461739	Asp129Glu	0.001
24	rs773456016	Tyr36Ser	0.201
25	rs777065585	Arg300Gly	1
26	rs777065585	Arg300Trp	1
27	rs777826805	Arg370Ser	1
28	rs777826805	Arg370Cys	1
29	rs1031532803	Glu34Ala	0.104
30	rs1031532803	Glu34Gly	0.534
31	rs1283579295	Ala23Glu	0.938
32	rs1283579295	Ala23Gly	0.811
33	rs1283579295	Ala23Val	0.014
34	rs1326368872	Cys16Tyr	0
35	rs1466887239	Arg411Ser	0.015
36	rs1466887239	Arg411Cys	0.995
37	rs1600311531	Val356Ala	1
38	rs1600311531	Val356Gly	1
39	rs1967252905	Ser415Gly	0.001
40	rs1975427515	Arg12Gly	0.013
41	rs1975427515	Arg12Trp	0.875
42	rs2513591022	Leu111Val	0.054
43	rs5392	Leu262Val	0.63
44	rs5392	Leu262Phe	0.056
45	rs1800436	Ala207Glu	0.541
46	rs1800436	Ala207Gly	0.002
47	rs1800436	Ala207Val	0.001
48	rs1800437	Glu354Lys	1
49	rs1800437	Glu354Gln	1
50	rs13306395	Glu463Gln	0.996
51	rs13306398	Gly198Cys	0.994
52	rs13306399	Cys46Ser	1
53	rs13306399	Cys46Phe	0.999
54	rs13306402	Arg136Gly	0.918
55	rs13306402	Arg136Trp	0.081
56	rs13306403	Arg316Leu	1
57	rs74751167	Arg341His	1
58	rs74751167	Arg341Pro	1
59	rs74751167	Arg341Leu	0.996
60	rs76439420	Glu252Asp	1
61	rs78464711	Thr232Lys	0.983
62	rs78464711	Thr232Arg	0.995
63	rs78464711	Thr232Met	0.854
64	rs115338345	Arg101His	1
65	rs115338345	Arg101Pro	1
66	rs115450421	Ile378Met	0.988
67	rs139215588	Arg190Gln	1
68	rs139952137	Cys46Arg	1
69	rs139952137	Cys46Gly	1
70	rs141816887	Ser189Arg	0.549
71	rs141898342	Ile172Val	0.998
72	rs142528936	Val99Ile	0.995
73	rs142528936	Val99Phe	1
74	rs142609845	Asp114Asn	0.976
75	rs143427324	Leu206Val	0.007
76	rs143427324	Leu206Phe	0.196
77	rs143430880	Glu288Gly	1
78	rs145986000	Thr178Lys	0.13
79	rs145986000	Thr178Met	0.537
80	rs146012706	Arg41Gln	0.041
81	rs146012706	Arg41Pro	0.911
82	rs146268621	Arg190Gly	1
83	rs146908284	Arg131Ser	0.085
84	rs147720155	Gln108His	0.076
85	rs149510000	Gln37Lys	0.104
86	rs149510000	Gln37Glu	0.008
87	rs149877592	Arg196Gln	0.002
88	rs149877592	Arg196Leu	0.008
89	rs150952013	Leu100Phe	0.011
90	rs183321661	Leu312Phe	0.005
91	rs191937467	Ala150Thr	0.005
92	rs191937467	Ala150Ser	0.144
93	rs192821802	Glu253Val	0.055
94	rs199583937	Arg183Gln	1
95	rs199583937	Arg183Pro	1
96	rs199584358	Tyr231Cys	1
97	rs199584358	Tyr231Phe	0.999
98	rs199645877	Pro348Thr	1
99	rs199645877	Pro348Ala	1
100	rs199645877	Pro348Ser	1
101	rs199991013	Arg136Gln	0.524
102	rs199991013	Arg136Leu	0.734
103	rs200089159	Gly351Cys	1
104	rs200233374	Arg192His	0.986
105	rs200233374	Arg192Pro	0.902
106	rs200291210	Thr116Arg	0.549
107	rs200291210	Thr116Ile	0.712
108	rs200485112	Arg217His	1
109	rs200485112	Arg217Leu	0.987
110	rs200562041	Leu262His	0.999
111	rs200602516	Glu282Lys	1
112	rs200979166	Leu13Phe	0.998
113	rs201212950	Asp191Glu	0.998
114	rs201866455	Gln364Lys	0.961
115	rs201866455	Gln364Glu	0.954
116	rs367687469	Arg101Cys	1
117	rs367927478	Leu15Val	0.319
118	rs367951213	Ile133Thr	0.015
119	rs369058974	Ala268Glu	0.959
120	rs369058974	Ala268Val	0.363
121	rs369696546	Ile295Leu	0.08
122	rs370966823	Ile403Val	0.441
123	rs370966823	Ile403Phe	0.87
124	rs373900520	Arg164Trp	1
125	rs374418965	Gly198Asp	0.684
126	rs374418965	Gly198Val	0.684
127	rs375178835	Glu461Lys	0.011
128	rs375178835	Glu461Gln	0.052
129	rs375231803	Glu237Ala	0.989
130	rs375292744	Arg328Gly	0.72
131	rs375751889	Leu176Val	0.141
132	rs376098378	Leu391Pro	1
133	rs376166364	Arg404His	0.999
134	rs376166364	Arg404Leu	1
135	rs376369148	Thr223Asn	0.984
136	rs376369148	Thr223Ile	0.938
137	rs377375984	Ser401Leu	0.933
138	rs529244730	Arg192Ser	0.653
139	rs529244730	Arg192Gly	0.653
140	rs529244730	Arg192Cys	0.999
141	rs529800464	Ser389Arg	1
142	rs529800464	Ser389Arg	1
143	rs531822305	Asn456Ile	0.128
144	rs534452890	Ile221Met	0.48
145	rs537402656	Ala96Thr	0
146	rs537402656	Ala96Ser	0
147	rs546589322	Leu344Gln	1
148	rs546589322	Leu344Pro	1
149	rs546589322	Leu344Arg	1
150	rs552883021	Ala80Asp	0.997
151	rs552883021	Ala80Gly	0.994
152	rs552883021	Ala80Val	0.493
153	rs553327970	Gly104Asp	0.515
154	rs553327970	Gly104Val	0.998
155	rs557495616	Gly97Asp	1
156	rs557495616	Gly97Val	1
157	rs561341259	Arg336Gln	0.985
158	rs561341259	Arg336Pro	0.995
159	rs562362862	Gly110Arg	0.901
160	rs562362862	Gly110Arg	0.901
161	rs562601321	His409Arg	0
162	rs562601321	His409Leu	0.057
163	rs568378559	Val94Gly	0.999
164	rs574231063	Arg22Lys	0.02
165	rs574231063	Arg22Thr	0.02
166	rs577227780	Glu135Gly	0.98
167	rs577332018	Trp287Cys	1
168	rs745407393	Arg289Ser	1
169	rs745407393	Arg289Cys	1
170	rs745643138	Trp233Arg	1
171	rs745643138	Trp233Arg	1
172	rs746004829	Arg331Leu	1
173	rs746029961	Ser64Pro	0.97
174	rs746029961	Ser64Ala	0.481
175	rs746270293	Glu418Lys	0.07
176	rs746529729	Gly202Ala	0.97
177	rs746529729	Gly202Val	0.999
178	rs746544644	Gly29Arg	0
179	rs746611074	Tyr240Cys	1
180	rs746666145	Val388Ile	0.995
181	rs746846121	Gly265Arg	1
182	rs746846121	Gly265Arg	1
183	rs746846121	Gly265Trp	1
184	rs746894609	Gly144Ser	1
185	rs747126972	Leu369Pro	1
186	rs747456820	Ile187Leu	0.767
187	rs747456820	Ile187Val	0.99
188	rs747456820	Ile187Phe	0.999
189	rs747689249	Arg405Ser	0.945
190	rs747689249	Arg405Gly	0.998
191	rs747689249	Arg405Cys	1
192	rs748048663	Ala340Gly	1
193	rs748321836	Pro302Thr	1
194	rs748321836	Pro302Ala	1
195	rs748321836	Pro302Ser	1
196	rs749033636	Phe371Leu	0.001
197	rs749416566	Leu325Met	1
198	rs749416566	Leu325Val	0.992
199	rs750599207	Glu363Gln	0.997
200	rs750730071	Gln224Pro	1
201	rs750730071	Gln224Arg	0.919
202	rs750730071	Gln224Leu	0.026
203	rs750759798	Gly97Ser	1
204	rs750992315	Leu111His	0.873
205	rs751114095	Ile315Thr	0.722
206	rs751598933	Gln37Leu	0.002
207	rs751994544	His255Pro	0.989
208	rs751994544	His255Arg	0.966
209	rs752466989	Leu280Pro	1
210	rs752518604	Gln285His	0.799
211	rs752518604	Gln285His	0.799
212	rs752700139	Tyr258Cys	0
213	rs753132857	Gln138Glu	0.998
214	rs753645152	Arg196Gly	0.407
215	rs754713426	Leu304Val	1
216	rs754713426	Leu304Phe	1
217	rs754797923	Gly438Ser	0
218	rs754919812	Gly144Ala	1
219	rs754919812	Gly144Val	1
220	rs754923594	Val277Ile	0.99
221	rs754923594	Val277Leu	0.957
222	rs754923594	Val277Phe	1
223	rs755119848	Cys118Arg	1
224	rs755265643	Ala229Val	1
225	rs755482777	Gln204Glu	0.425
226	rs755854967	Gly449Glu	0.19
227	rs755854967	Gly449Ala	0.19
228	rs756362775	Val139Ile	0.004
229	rs756362775	Val139Leu	0.002
230	rs756542079	Ser323Ala	0.134
231	rs757113718	Thr232Ala	0.826
232	rs757368172	Ser14Pro	0.021
233	rs757411620	Tyr141Cys	1
234	rs757704281	Glu362Lys	0.998
235	rs757774381	Trp90Ser	1
236	rs758081370	Arg43His	0.976
237	rs758081370	Arg43Leu	0.561
238	rs758853827	Gln224His	0.376
239	rs758913561	Glu291Lys	0.963
240	rs758951680	His115Asn	0.999
241	rs758951680	His115Tyr	1
242	rs759364715	Gly104Ser	0.983
243	rs760064068	Leu159Phe	1
244	rs760322437	Gln220His	1
245	rs760439238	Thr218Lys	0.954
246	rs760439238	Thr218Arg	0.986
247	rs760439238	Thr218Met	0.988
248	rs760668685	Met305Thr	0.022
249	rs760668685	Met305Arg	0.202
250	rs761170379	Phe162Leu	0.543
251	rs761170379	Phe162Leu	0.543
252	rs761358733	Trp109Arg	1
253	rs761433216	Val248Ala	0.309
254	rs761521986	Leu308Phe	0.801
255	rs761521986	Leu308Phe	0.801
256	rs761937534	Phe270Leu	1
257	rs762044051	His166Arg	0.001
258	rs762044051	His166Leu	0.546
259	rs762075272	Gly33Glu	0.027
260	rs762568674	Leu132Phe	0.779
261	rs762840878	Asp72Asn	0.001
262	rs763016615	Asp191His	1
263	rs763469385	Lys397Thr	0.998
264	rs763745105	Ile307Leu	0.954
265	rs763745105	Ile307Val	0.929
266	rs763766830	Gln108Pro	1
267	rs763766830	Gln108Arg	0.619
268	rs763800857	Trp287Arg	1
269	rs764005735	Glu40Lys	0
270	rs764005735	Glu40Gln	0.001
271	rs764159693	Val399Met	1
272	rs764159693	Val399Leu	0.995
273	rs765523505	Glu362Ala	0.998
274	rs766200229	Gly263Asp	1
275	rs766200229	Gly263Ala	0.993
276	rs766215216	Pro76Ala	0.001
277	rs766298263	Val271Ile	0.999
278	rs766298263	Val271Leu	0.999
279	rs766298263	Val271Phe	1
280	rs766507724	Val227Met	0.999
281	rs766507724	Val227Leu	0.957
282	rs766706851	Glu398Gly	1
283	rs767107879	Arg81Gly	0.001
284	rs767107879	Arg81Cys	0.99
285	rs767350180	Pro441Arg	0.002
286	rs767350180	Pro441Leu	0.22
287	rs767963853	Arg41Gly	0.589
288	rs767963853	Arg41Trp	0.996
289	rs768328822	Leu241Met	1
290	rs768328822	Leu241Val	0.979
291	rs768343561	Ala51Gly	0
292	rs768343561	Ala51Val	0.049
293	rs768835069	Ile299Val	0.997
294	rs769881973	Arg341Ser	0.992
295	rs769881973	Arg341Cys	1
296	rs770058765	Ala126Pro	0.002
297	rs770058765	Ala126Ser	0.022
298	rs770243512	Cys393Ser	1
299	rs770243512	Cys393Gly	1
300	rs770542326	Leu157Ile	0.606
301	rs770542326	Leu157Phe	0.606
302	rs771165150	Trp209Leu	0.95
303	rs771213011	Arg326Lys	0.37
304	rs771213011	Arg326Thr	0.999
305	rs771213011	Arg326Met	1
306	rs771599742	Arg414His	0.002
307	rs771599742	Arg414Leu	0.001
308	rs771604786	Thr218Ala	0.625
309	rs771775364	Ala185Glu	0.81
310	rs771775364	Ala185Gly	0.004
311	rs771775364	Ala185Val	0.004
312	rs771861504	Thr25Arg	0.745
313	rs772204041	Ser64Tyr	0.99
314	rs772263243	Leu462Val	0.172
315	rs772330903	Glu418Asp	0
316	rs773077336	Met67Arg	0.666
317	rs773245641	Pro302Arg	1
318	rs773245641	Pro302Leu	1
319	rs773690389	Phe394Leu	0.957
320	rs773981009	Cys216Tyr	0.999
321	rs774121477	Thr343Ser	0.994
322	rs774479348	Gln102His	0.003
323	rs774479348	Gln102His	0.003
324	rs774955951	Gln384His	1
325	rs775273533	Tyr240His	0.945
326	rs775485595	Thr450Asn	0.006
327	rs775485595	Thr450Ser	0.006
328	rs775485595	Thr450Ile	0.006
329	rs775596829	Asp66Asn	1
330	rs775963892	Leu161Ser	0.007
331	rs776087069	Ser243Arg	0.007
332	rs776195351	Leu9Gln	0.001
333	rs776195351	Leu9Arg	0.001
334	rs776722055	Arg429Gly	0.451
335	rs776722055	Arg429Trp	0.993
336	rs776870228	Arg164Gln	0.993
337	rs777440834	Trp407Cys	1
338	rs778330895	Pro85Leu	1
339	rs778523534	Glu288Asp	1
340	rs778589587	Ser381Arg	0.998
341	rs778824900	Met330Thr	0.991
342	rs778824900	Met330Arg	0.897
343	rs778991427	Ala126Gly	0.361
344	rs778991427	Ala126Val	0.001
345	rs779659417	Lys28Thr	0.003
346	rs779659417	Lys28Met	0.021
347	rs779746611	Gly385Asp	1
348	rs779746611	Gly385Ala	1
349	rs779746611	Gly385Val	1
350	rs779781285	Trp264Cys	1
351	rs780240463	Ala368Gly	0.001
352	rs780295269	Leu339Val	0.953
353	rs780482234	Val292Ile	0.001
354	rs780482234	Val292Phe	0.655
355	rs781098053	Glu24Gly	0.001
356	rs781376749	Asn230Asp	0.972
357	rs781601202	Gln204His	0.927
358	rs781605844	Lys123Arg	0.001
359	rs781700423	Leu318Arg	0.999
360	rs866288585	Gly455Trp	0.004
361	rs866824282	Arg460Gln	0.813
362	rs866824282	Arg460Pro	0.001
363	rs866824282	Arg460Leu	0.358
364	rs868753873	Leu451Pro	0.999
365	rs879204188	Glu291Ala	0.822
366	rs893921559	Tyr87His	0.992
367	rs893921559	Tyr87Asp	0.99
368	rs895070635	Leu416Pro	0.999
369	rs907354578	Ala60Thr	0.008
370	rs907354578	Ala60Ser	0.001
371	rs909594604	Arg338Lys	1
372	rs909594604	Arg338Met	1
373	rs916759726	Ile221Thr	0.801
374	rs922549961	Ile315Val	0.008
375	rs929741717	Asn283Tyr	1
376	rs936566210	His408Tyr	0.57
377	rs944629490	Ser243Asn	0.004
378	rs946153684	Leu152Val	0.996
379	rs949164129	Thr168Pro	1
380	rs949164129	Thr168Ala	0.999
381	rs951907131	Tyr225Asn	1
382	rs951907131	Tyr225His	1
383	rs951907131	Tyr225Asp	1
384	rs963958599	Asn396Asp	0.994
385	rs967551309	Tyr171His	0.071
386	rs969853506	Val222Ala	0.472
387	rs988177813	His255Tyr	0.005
388	rs992990240	Met140Ile	0.038
389	rs992990240	Met140Ile	0.038
390	rs1008214868	Pro454Ser	0
391	rs1037945127	Met181Val	0.001
392	rs1037945127	Met181Leu	0.007
393	rs1038500454	Ser27Phe	0.001
394	rs1041059613	Gln364Arg	0.98
395	rs1041279189	Val275Ala	0.998
396	rs1050292138	Gly445Ser	0
397	rs1052964384	Thr79Ile	0.008
398	rs1054638969	Pro432Leu	0.058
399	rs1159403383	Arg331Ser	1
400	rs1159403383	Arg331Cys	1
401	rs1160504181	Thr3Pro	0.165
402	rs1160504181	Thr3Ala	0.002
403	rs1160818602	Ala372Thr	0.004
404	rs1162934288	Thr142Ala	0.994
405	rs1162934288	Thr142Ser	0.968
406	rs1165587745	Ile320Val	0.025
407	rs1166546349	Gly434Ala	0.043
408	rs1167664394	Arg38His	0.909
409	rs1167664394	Arg38Leu	0.116
410	rs1167995273	Tyr87Cys	0.993
411	rs1169752232	Leu346Met	1
412	rs1174215903	Asn210Lys	0.669
413	rs1174610520	His408Gln	0.004
414	rs1177407521	Arg289Leu	0.991
415	rs1183524419	Gln329Lys	0.931
416	rs1183877126	Ala60Asp	0.161
417	rs1183877126	Ala60Val	0.01
418	rs1184520323	Pro85Ser	1
419	rs1190063175	Glu425Asp	0
420	rs1191126600	Ala266Asp	0.994
421	rs1191126600	Ala266Val	0.513
422	rs1192401965	Pro55Gln	0.598
423	rs1192401965	Pro55Leu	0.997
424	rs1192921151	Gly58Arg	0.973
425	rs1192921151	Gly58Cys	0.998
426	rs1194775078	Ile395Thr	0.003
427	rs1194857545	Glu282Gly	1
428	rs1195596252	Arg12Gln	0.117
429	rs1195596252	Arg12Pro	0.108
430	rs1195596252	Arg12Leu	0
431	rs1199352514	Pro199Ala	0.961
432	rs1201830652	Ser148Pro	1
433	rs1205454158	Pro424Ser	0.024
434	rs1206338770	Ala358Val	0.763
435	rs1207653012	Glu398Asp	0.964
436	rs1207653012	Glu398Asp	0.964
437	rs1208334112	Gly263Arg	1
438	rs1209978691	Gly375Asp	0.934
439	rs1210667721	His408Pro	0.934
440	rs1212577985	Ala212Val	0.052
441	rs1212649997	Asn77Ser	0.815
442	rs1213046506	Trp90Arg	1
443	rs1213210232	Val360Ala	0.943
444	rs1213375020	Pro5Ser	0.02
445	rs1213828181	Phe311Leu	0.98
446	rs1219022847	Ala219Thr	0.995
447	rs1220920823	Ser435Tyr	0.255
448	rs1220920823	Ser435Cys	0.001
449	rs1221375035	Val356Met	1
450	rs1221375035	Val356Leu	0.997
451	rs1225944553	Asn396Ser	0.988
452	rs1227407742	Ser464Gly	0.295
453	rs1228138086	Gln211Glu	0.002
454	rs1234558737	Ala185Ser	0.193
455	rs1237195910	Leu59Phe	0.987
456	rs1238439945	Thr31Ala	0.006
457	rs1238867898	Gln204Arg	0.006
458	rs1240035681	Ala82Glu	0.016
459	rs1240035681	Ala82Val	0.004
460	rs1241059563	Thr361Arg	0.996
461	rs1241110746	Pro267Ser	1
462	rs1242475885	Leu325Pro	1
463	rs1242475885	Leu325Arg	0.995
464	rs1242682647	Val248Met	0.322
465	rs1242682647	Val248Leu	0.03
466	rs1242682647	Val248Leu	0.03
467	rs1242762299	Gly250Ser	0.379
468	rs1247193840	Ala207Thr	0
469	rs1247193840	Ala207Ser	0.005
470	rs1250456462	Glu377Lys	0.978
471	rs1253475220	Pro424Arg	0.033
472	rs1253475220	Pro424Leu	0.032
473	rs1255307825	Glu24Asp	0.083
474	rs1260327096	Thr2Ile	0.012
475	rs1268550499	Gly351Val	1
476	rs1268894911	Val399Ala	1
477	rs1269105159	Ser342Tyr	0.999
478	rs1271429083	Leu165Gln	1
479	rs1271429083	Leu165Pro	1
480	rs1271638992	Leu137Trp	1
481	rs1272063997	Val277Asp	1
482	rs1272063997	Val277Ala	0.999
483	rs1272135046	Ala52Val	0.22
484	rs1272857676	Leu147Val	0.021
485	rs1281057139	Leu321Phe	1
486	rs1281459393	Cys61Trp	1
487	rs1283055836	Lys373Arg	0.038
488	rs1287346364	Val143Leu	0.158
489	rs1293207420	Leu312Pro	0.989
490	rs1293291666	Gly436Asp	0.027
491	rs1293291666	Gly436Val	0.87
492	rs1296131841	Met67Ile	0.925
493	rs1298512253	Ser146Phe	1
494	rs1299669089	Val355Met	0.899
495	rs1299669089	Val355Leu	0.511
496	rs1301966065	Val236Met	0.999
497	rs1301966065	Val236Leu	0.639
498	rs1301966065	Val236Leu	0.639
499	rs1302808260	Pro348His	1
500	rs1302808260	Pro348Leu	1
501	rs1302860359	Cys393Trp	1
502	rs1308874119	Pro432Ala	0.012
503	rs1310737721	Cys70Trp	1
504	rs1319561036	Leu50Ser	1
505	rs1322290664	Gly254Val	0.939
506	rs1323112980	Ala458Thr	0.041
507	rs1331409148	Pro195Leu	0.998
508	rs1332745859	Pro454Arg	0.201
509	rs1335419201	Arg333Gln	0.01
510	rs1335812987	Gln30Leu	0.362
511	rs1339255632	Met1Lys	0.932
512	rs1339255632	Met1Thr	0.932
513	rs1341234286	Pro437Gln	0.911
514	rs1341234286	Pro437Leu	0.01
515	rs1341422602	Phe65Ser	1
516	rs1342003668	Leu147Pro	1
517	rs1348050540	Leu244Phe	1
518	rs1350560503	Ala458Gly	0.001
519	rs1351305809	Ala95Val	0.669
520	rs1351994626	Gly238Ser	1
521	rs1352444741	Gly417Ser	0.003
522	rs1352444741	Gly417Cys	0.953
523	rs1352613567	Arg22Gly	0.02
524	rs1354017445	Gly17Glu	0.003
525	rs1358165763	Ala372Val	0.006
526	rs1361351715	Val352Ile	0.005
527	rs1364507294	Tyr392His	1
528	rs1366685396	Gly319Ser	0.989
529	rs1368040383	Thr142Ile	1
530	rs1369447060	Phe379Leu	0.896
531	rs1369803107	Asp114Ala	0.986
532	rs1375718082	Glu457Ala	0.319
533	rs1375718082	Glu457Val	0.769
534	rs1380779310	Ala219Gly	0.992
535	rs1380779310	Ala219Val	0.998
536	rs1382604138	Arg316Gly	1
537	rs1382604138	Arg316Cys	1
538	rs1387402382	Arg43Gly	0.008
539	rs1387402382	Arg43Cys	0.993
540	rs1389933999	Phe394Tyr	0.997
541	rs1391121892	Pro121Thr	0.979
542	rs1392345482	Phe98Ser	0.211
543	rs1392345482	Phe98Cys	0.955
544	rs1397072750	Ala294Asp	0.998
545	rs1397072750	Ala294Val	0.994
546	rs1398479613	Ser14Leu	0
547	rs1399084778	Ala215Thr	0.001
548	rs1399109296	Leu88Met	1
549	rs1400588485	Glu119Asp	0.978
550	rs1402973041	Leu261Phe	0.046
551	rs1403326994	Ser433Ala	0.002
552	rs1403849957	Glu457Lys	0.319
553	rs1404862624	Met1Val	0.713
554	rs1404862624	Met1Leu	0.518
555	rs1405223050	Ile299Lys	1
556	rs1405223050	Ile299Thr	1
557	rs1405568033	Gln329His	0.998
558	rs1406036788	Gly63Arg	0.169
559	rs1406036788	Gly63Arg	0.169
560	rs1407447389	Ser382Thr	0.989
561	rs1409498957	Ser415Arg	0.003
562	rs1421258833	Ala78Thr	0
563	rs1422595650	Gln117Lys	0.994
564	rs1422595650	Gln117Glu	0.999
565	rs1425254785	Arg426His	0.001
566	rs1425254785	Arg426Leu	0
567	rs1426918514	Pro273His	1
568	rs1426918514	Pro273Leu	0.993
569	rs1427212644	Ser57Thr	0
570	rs1427212644	Ser57Ala	0
571	rs1431350838	Val390Ile	0.001
572	rs1431587256	Asn290Lys	1
573	rs1434293020	Ala427Thr	0
574	rs1438652009	Ser459Asn	0
575	rs1439493776	Val94Met	0.985
576	rs1443165087	Glu362Asp	0.996
577	rs1446858641	Asn175Ser	1
578	rs1447106220	Lys373Asn	0.921
579	rs1452158129	Tyr281Ser	0.901
580	rs1452158129	Tyr281Cys	0.995
581	rs1453035216	Val360Met	0.505
582	rs1453035216	Val360Leu	0
583	rs1457848658	Ser382Tyr	1
584	rs1457848658	Ser382Cys	1
585	rs1467777931	Cys332Ser	0.679
586	rs1467777931	Cys332Arg	0.064
587	rs1468180757	Asp114Glu	0.741
588	rs1470786853	Thr168Ser	1
589	rs1472096312	Arg405His	0.996
590	rs1472096312	Arg405Leu	0.998
591	rs1473965355	Leu380Phe	0.573
592	rs1475472835	Pro267Leu	1
593	rs1475672652	Leu10Gln	0.984
594	rs1475672652	Leu10Pro	0.984
595	rs1477910137	Trp209Arg	0.108
596	rs1488778919	Tyr335Ser	1
597	rs1488778919	Tyr335Phe	0.985
598	rs1489753383	Thr442Ile	0
599	rs1490061680	Val352Ala	0.998
600	rs1490770455	Gly265Glu	1
601	rs1490770455	Gly265Ala	1
602	rs1490770455	Gly265Val	1
603	rs1555777129	Glu439Gln	0.001
604	rs1568515736	Pro5Arg	0.001
605	rs1568515736	Pro5Leu	0.102
606	rs1568519157	Arg113Ser	1
607	rs1568520474	Arg131Lys	0.001
608	rs1568520474	Arg131Met	0.017
609	rs1568525938	Ile313Val	0.981
610	rs1568526187	Asp334Val	0.991
611	rs1600285930	Gly33Arg	0.51
612	rs1600285930	Gly33Trp	0.994
613	rs1600285997	Trp39Arg	1
614	rs1600285997	Trp39Gly	0.999
615	rs1600292647	Ser105Arg	0.863
616	rs1600297230	Thr151Pro	0.896
617	rs1600297230	Thr151Ser	0.045
618	rs1600308086	Tyr281His	0.949
619	rs1600309631	Thr301Pro	0.999
620	rs1600311278	Val347Ala	0.896
621	rs1600311278	Val347Gly	0.984
622	rs1600311473	Val355Gly	1
623	rs1600321610	Gly406Ser	0.008
624	rs1600322144	Val440Ala	0.001
625	rs1966970464	Gly228Asp	0.989
626	rs1966970464	Gly228Val	0.989
627	rs1966970607	Ala229Thr	1
628	rs1966971184	Asn230Ser	0.523
629	rs1966973819	His242Asn	1
630	rs1966973819	His242Tyr	0.079
631	rs1966976959	Arg257Leu	0.579
632	rs1966996644	Pro273Thr	0.973
633	rs1966999616	Tyr279His	0.151
634	rs1967002101	Asn283Ser	0.984
635	rs1967002668	Gln285Pro	0.026
636	rs1967002668	Gln285Arg	0.002
637	rs1967002668	Gln285Leu	0
638	rs1967026576	Trp296Cys	1
639	rs1967027607	Thr301Ile	0.817
640	rs1967040961	Gly319Asp	0.998
641	rs1967040961	Gly319Val	0.994
642	rs1967042874	Thr327Ala	0.004
643	rs1967043171	Arg328Gln	0.967
644	rs1967043171	Arg328Leu	1
645	rs1967044527	Arg333Gly	0.03
646	rs1967045317	Arg336Trp	1
647	rs1967054889	His353Pro	1
648	rs1967057862	Ala365Gly	0.802
649	rs1967057862	Ala365Val	0.029
650	rs1967060366	Phe379Ser	0.995
651	rs1967060719	Ser381Thr	0.852
652	rs1967232588	Phe394Leu	0.957
653	rs1967232588	Phe394Val	0.998
654	rs1967245452	Gln400His	1
655	rs1967247063	Ile403Thr	0.931
656	rs1967247063	Ile403Ser	0.964
657	rs1967251128	Cys410Gly	0.454
658	rs1967251703	Arg411His	0.947
659	rs1967251703	Arg411Pro	0.697
660	rs1967252227	Arg413Cys	0.995
661	rs1967252470	Arg414Gly	0.208
662	rs1967258270	Ala430Val	0.001
663	rs1967263421	Ser448Leu	0
664	rs1967265536	Asn456Lys	0.029
665	rs1967265984	Glu457Asp	0.001
666	rs1975427213	Leu10Val	0.734
667	rs1975428512	Cys16Trp	0
668	rs1975429273	Leu20Phe	0.019
669	rs1975484472	Gly29Glu	0
670	rs1975486722	Arg38Cys	0.991
671	rs1975487620	Tyr42Ser	1
672	rs1975488210	Arg44Ser	0
673	rs1975489131	Ala51Thr	0.001
674	rs1975489448	Ala52Thr	0.003
675	rs1975527099	Asn62His	0.995
676	rs1975527099	Asn62Asp	0.968
677	rs1975528967	Val69Ile	0.807
678	rs1975530141	Ala78Asp	0.001
679	rs1975530141	Ala78Gly	0.081
680	rs1975530933	Arg81His	0.895
681	rs1975530933	Arg81Leu	0.1
682	rs1975531069	Ala82Thr	0.006
683	rs1975531069	Ala82Ser	0.001
684	rs1975532894	Pro89Thr	0.453
685	rs1975532894	Pro89Ser	0.089
686	rs1975533068	Pro89Leu	0.93
687	rs1975615524	Gly107Ser	0.999
688	rs1975615524	Gly107Cys	1
689	rs1975616522	Gly110Val	0.901
690	rs1975617313	His115Gln	1
691	rs1975618117	Glu119Lys	0.978
692	rs1975706542	Ala155Ser	0.997
693	rs1975707791	Leu161Phe	0.001
694	rs1975737950	Arg169Lys	1
695	rs1975737950	Arg169Ile	1
696	rs1975739705	Ser179Phe	1
697	rs1975740224	Leu182Pro	1
698	rs1975746793	Leu206His	0.196
699	rs1975746793	Leu206Pro	0
700	rs2146092521	Gly228Ser	0.433
701	rs2146092902	Gly249Arg	0.028
702	rs2146092983	Gly254Ser	0.078
703	rs2146095934	Ile303Thr	1
704	rs2146106199	Gly436Ser	0.66
705	rs2146106199	Gly436Arg	0.986
706	rs2513576591	Met1Ile	0.851
707	rs2513576638	Ser4Pro	0
708	rs2513576642	Ser4Phe	0.002
709	rs2513576700	Gln8Pro	0.046
710	rs2513576895	Leu18Met	0.826
711	rs2513576901	Leu19Pro	0.001
712	rs2513576926	Leu20Pro	0.001
713	rs2513576978	Ala23Thr	0.455
714	rs2513576978	Ala23Ser	0.455
715	rs2513577011	Glu24Gln	0.003
716	rs2513580901	Thr25Ala	0.001
717	rs2513580913	Gly26Ser	0.001
718	rs2513580923	Ser27Pro	0.001
719	rs2513580938	Lys28Glu	0
720	rs2513581045	Glu34Lys	0.534
721	rs2513581064	Leu35Val	0.013
722	rs2513581079	Leu35Gln	0.994
723	rs2513581165	Glu40Gly	0.006
724	rs2513581225	Glu45Lys	0.518
725	rs2513581273	Glu48Lys	0.002
726	rs2513581361	Pro56Ala	0.116
727	rs2513581377	Ser57Leu	0.001
728	rs2513583496	Gly58Val	0.973
729	rs2513583656	Phe65Leu	0.999
730	rs2513583714	Tyr68His	1
731	rs2513583724	Tyr68Cys	1
732	rs2513583724	Tyr68Phe	0.999
733	rs2513583752	Val69Ala	0.001
734	rs2513583779	Cys70Tyr	1
735	rs2513583779	Cys70Phe	0.999
736	rs2513583818	Tyr73His	0.001
737	rs2513583861	Asn77His	0.991
738	rs2513583921	Thr79Ser	0.044
739	rs2513584073	Cys84Tyr	0.999
740	rs2513584175	Leu88Arg	0.995
741	rs2513590506	Ala95Ser	0.051
742	rs2513591045	Trp112Arg	1
743	rs2513591402	Pro121Gln	0.988
744	rs2513591438	Glu122Ala	0.1
745	rs2513591482	Lys123Asn	0.454
746	rs2513591609	Phe127Cys	0.988
747	rs2513597853	Gln130Glu	0.236
748	rs2513597866	Gln130Arg	0.417
749	rs2513597924	Leu134Trp	1
750	rs2513598054	Val139Gly	0.999
751	rs2513598063	Met140Val	0.086
752	rs2513598133	Tyr141Asn	1
753	rs2513598440	Leu152Arg	0.999
754	rs2513598467	Leu153Pro	1
755	rs2513598491	Ala155Asp	1
756	rs2513598573	Ile158Val	0.813
757	rs2513598582	Ile158Thr	1
758	rs2513598606	Ile158Met	0.999
759	rs2513598708	Phe162Leu	0.543
760	rs2513602043	Leu165Val	1
761	rs2513602093	His166Tyr	0.912
762	rs2513602133	Cys167Tyr	1
763	rs2513602163	Arg169Gly	1
764	rs2513602187	Asn170Ser	0.99
765	rs2513602263	Ile172Asn	1
766	rs2513602303	Ile174Val	0.003
767	rs2513602339	Phe177Leu	1
768	rs2513602362	Phe177Ser	1
769	rs2513602370	Phe177Leu	1
770	rs2513602415	Phe180Ser	1
771	rs2513602448	Met181Thr	0.001
772	rs2513602497	Ala184Thr	1
773	rs2513602563	Ile187Asn	1
774	rs2513602572	Leu188Val	1
775	rs2513602599	Ser189Arg	0.549
776	rs2513602681	Asp191Val	1
777	rs2513602781	Leu194Pro	1
778	rs2513602794	Pro195Ser	0.999
779	rs2513602917	Pro197Ser	0.27
780	rs2513602995	Tyr200Cys	0.987
781	rs2513603251	Asn210Ser	0.051
782	rs2513611703	Ala215Val	0.166
783	rs2513611729	Cys216Ser	1
784	rs2513611729	Cys216Gly	1
785	rs2513611932	Cys226Ser	0.997
786	rs2513611950	Val227Glu	0.999
787	rs2513611950	Val227Ala	0.977
788	rs2513612038	Asn230Lys	0.938
789	rs2513612124	Leu234Pro	1
790	rs2513612176	Gly238Ala	1
791	rs2513612176	Gly238Val	1
792	rs2513612198	Val239Ile	0.009
793	rs2513612269	Leu241Arg	0.997
794	rs2513612344	Val246Glu	0.984
795	rs2513612354	Leu247Phe	0.009
796	rs2513612364	Leu247Pro	0.57
797	rs2513612443	Gly249Glu	0.012
798	rs2513612505	Glu252Lys	1
799	rs2513612505	Glu252Gln	1
800	rs2513612624	Phe256Tyr	0.812
801	rs2513612624	Phe256Ser	1
802	rs2513612702	Tyr259His	1
803	rs2513612712	Tyr259Cys	1
804	rs2513614241	Ala266Thr	0.589
805	rs2513614241	Ala266Pro	0.998
806	rs2513614312	Leu269Pro	1
807	rs2513614330	Phe270Cys	1
808	rs2513614403	Trp274Leu	1
809	rs2513614458	Arg278Gly	1
810	rs2513614598	Glu282Asp	0.999
811	rs2513614648	Thr284Arg	0.999
812	rs2513614648	Thr284Met	1
813	rs2513614671	Gln285Lys	0.036
814	rs2513616302	Cys286Trp	1
815	rs2513616437	Ala294Thr	0.989
816	rs2513616497	Ile298Val	0.998
817	rs2513616506	Ile298Thr	1
818	rs2513616680	Leu308Val	0.992
819	rs2513617574	Ile315Met	0.349
820	rs2513617602	Ile317Thr	1
821	rs2513617602	Ile317Ser	1
822	rs2513617619	Leu318Phe	0.998
823	rs2513617711	Leu322Arg	0.949
824	rs2513617806	Thr327Arg	0.884
825	rs2513617852	Gln329Arg	0.113
826	rs2513617882	Met330Leu	0.293
827	rs2513617906	Met330Ile	0.824
828	rs2513618061	Leu337Pro	0.996
829	rs2513618061	Leu337Arg	0.976
830	rs2513618548	Leu339Gln	1
831	rs2513618559	Ala340Thr	1
832	rs2513618664	Thr343Arg	1
833	rs2513618707	Thr345Lys	1
834	rs2513618707	Thr345Met	1
835	rs2513618763	Val347Leu	0.379
836	rs2513618935	His353Tyr	1
837	rs2513619032	Ala358Ser	0.846
838	rs2513619164	Ala365Ser	0.007
839	rs2513619190	Arg366Trp	0.964
840	rs2513619195	Arg366Leu	0.13
841	rs2513619238	Ala368Pro	0.896
842	rs2513619256	Leu369Met	1
843	rs2513619296	Arg370His	1
844	rs2513619296	Arg370Pro	1
845	rs2513619310	Phe371Tyr	0
846	rs2513619371	Leu374Phe	0.714
847	rs2513619400	Phe376Cys	1
848	rs2513619425	Ile378Val	0.509
849	rs2513619425	Ile378Phe	0.976
850	rs2513619432	Ile378Asn	0.976
851	rs2513619432	Ile378Thr	0.852
852	rs2513625979	Gly385Ser	1
853	rs2513626072	Val390Ala	0.982
854	rs2513626093	Leu391Phe	1
855	rs2513626191	Ile395Val	0.006
856	rs2513626223	Lys397Glu	0.998
857	rs2513626256	Glu398Lys	0.931
858	rs2513626903	Glu402Gln	1
859	rs2513627022	Trp407Arg	1
860	rs2513627022	Trp407Gly	1
861	rs2513627066	Cys410Tyr	0.744
862	rs2513627110	Arg413His	0.008
863	rs2513627149	Leu416Val	0.894
864	rs2513627186	Gly417Val	0.049
865	rs2513627225	Arg421Cys	0.039
866	rs2513627245	Gln422Arg	0
867	rs2513627253	Leu423Pro	0
868	rs2513627304	Glu425Gln	0.003
869	rs2513627363	Arg429Gln	0.024
870	rs2513627363	Arg429Pro	0.854
871	rs2513627436	Gly434Cys	0.979
872	rs2513627524	Gly438Asp	0
873	rs2513627557	Pro441Ser	0.022
874	rs2513627592	Ser443Ile	0.003
875	rs2513627598	Ser443Arg	0
876	rs2513627604	Arg444Ser	0.004
877	rs2513627622	Gly445Asp	0.003
878	rs2513627639	Leu446Phe	0.435
879	rs2513627664	Gly449Trp	0.975
880	rs2513627718	Pro452Ala	0.068
881	rs2513627723	Pro452Arg	0.868
882	rs2513627941	Glu463Asp	0.999
883	rs2513627966	Cys466Tyr	0.766
884	rs2513627966	Cys466Ser	0.791
885	rs1800437	Glu354Lys	1
886	rs1800437	Glu354Gln	1
887	rs1800437	Glu354Lys	1
888	rs1800437	Glu354Gln	1
889	rs1800437	Glu354Lys	1
890	rs1800437	Glu354Gln	1
891	rs13306402	Arg136Gly	0.918
892	rs13306402	Arg136Trp	0.081
893	rs13306403	Arg316Leu	1

## Sheet: 1. PolyPhen-2 ≥0.9 (480)
PolyPhen-2 ≥0.9 (480)
Variants surviving this step (cumulative scores for all filters applied through this point).
No.	dbSNP rsID	Amino acid change	PolyPhen-2
1	rs143490173	Asp66Gly	1
2	rs143490173	Asp66Val	0.999
3	rs201980985	Cys286Arg	1
4	rs373040041	Leu304Pro	1
5	rs373040041	Leu304Arg	1
6	rs756277634	Leu261His	0.999
7	rs756277634	Leu261Pro	0.997
8	rs764416244	Met140Thr	0.928
9	rs766119961	Arg404Ser	1
10	rs777065585	Arg300Gly	1
11	rs777065585	Arg300Trp	1
12	rs777826805	Arg370Ser	1
13	rs777826805	Arg370Cys	1
14	rs1283579295	Ala23Glu	0.938
15	rs1466887239	Arg411Cys	0.995
16	rs1600311531	Val356Ala	1
17	rs1600311531	Val356Gly	1
18	rs1800437	Glu354Lys	1
19	rs1800437	Glu354Gln	1
20	rs13306395	Glu463Gln	0.996
21	rs13306398	Gly198Cys	0.994
22	rs13306399	Cys46Ser	1
23	rs13306399	Cys46Phe	0.999
24	rs13306402	Arg136Gly	0.918
25	rs13306403	Arg316Leu	1
26	rs74751167	Arg341His	1
27	rs74751167	Arg341Pro	1
28	rs74751167	Arg341Leu	0.996
29	rs76439420	Glu252Asp	1
30	rs78464711	Thr232Lys	0.983
31	rs78464711	Thr232Arg	0.995
32	rs115338345	Arg101His	1
33	rs115338345	Arg101Pro	1
34	rs115450421	Ile378Met	0.988
35	rs139215588	Arg190Gln	1
36	rs139952137	Cys46Arg	1
37	rs139952137	Cys46Gly	1
38	rs141898342	Ile172Val	0.998
39	rs142528936	Val99Ile	0.995
40	rs142528936	Val99Phe	1
41	rs142609845	Asp114Asn	0.976
42	rs143430880	Glu288Gly	1
43	rs146012706	Arg41Pro	0.911
44	rs146268621	Arg190Gly	1
45	rs199583937	Arg183Gln	1
46	rs199583937	Arg183Pro	1
47	rs199584358	Tyr231Cys	1
48	rs199584358	Tyr231Phe	0.999
49	rs199645877	Pro348Thr	1
50	rs199645877	Pro348Ala	1
51	rs199645877	Pro348Ser	1
52	rs200089159	Gly351Cys	1
53	rs200233374	Arg192His	0.986
54	rs200233374	Arg192Pro	0.902
55	rs200485112	Arg217His	1
56	rs200485112	Arg217Leu	0.987
57	rs200562041	Leu262His	0.999
58	rs200602516	Glu282Lys	1
59	rs200979166	Leu13Phe	0.998
60	rs201212950	Asp191Glu	0.998
61	rs201866455	Gln364Lys	0.961
62	rs201866455	Gln364Glu	0.954
63	rs367687469	Arg101Cys	1
64	rs369058974	Ala268Glu	0.959
65	rs373900520	Arg164Trp	1
66	rs375231803	Glu237Ala	0.989
67	rs376098378	Leu391Pro	1
68	rs376166364	Arg404His	0.999
69	rs376166364	Arg404Leu	1
70	rs376369148	Thr223Asn	0.984
71	rs376369148	Thr223Ile	0.938
72	rs377375984	Ser401Leu	0.933
73	rs529244730	Arg192Cys	0.999
74	rs529800464	Ser389Arg	1
75	rs529800464	Ser389Arg	1
76	rs546589322	Leu344Gln	1
77	rs546589322	Leu344Pro	1
78	rs546589322	Leu344Arg	1
79	rs552883021	Ala80Asp	0.997
80	rs552883021	Ala80Gly	0.994
81	rs553327970	Gly104Val	0.998
82	rs557495616	Gly97Asp	1
83	rs557495616	Gly97Val	1
84	rs561341259	Arg336Gln	0.985
85	rs561341259	Arg336Pro	0.995
86	rs562362862	Gly110Arg	0.901
87	rs562362862	Gly110Arg	0.901
88	rs568378559	Val94Gly	0.999
89	rs577227780	Glu135Gly	0.98
90	rs577332018	Trp287Cys	1
91	rs745407393	Arg289Ser	1
92	rs745407393	Arg289Cys	1
93	rs745643138	Trp233Arg	1
94	rs745643138	Trp233Arg	1
95	rs746004829	Arg331Leu	1
96	rs746029961	Ser64Pro	0.97
97	rs746529729	Gly202Ala	0.97
98	rs746529729	Gly202Val	0.999
99	rs746611074	Tyr240Cys	1
100	rs746666145	Val388Ile	0.995
101	rs746846121	Gly265Arg	1
102	rs746846121	Gly265Arg	1
103	rs746846121	Gly265Trp	1
104	rs746894609	Gly144Ser	1
105	rs747126972	Leu369Pro	1
106	rs747456820	Ile187Val	0.99
107	rs747456820	Ile187Phe	0.999
108	rs747689249	Arg405Ser	0.945
109	rs747689249	Arg405Gly	0.998
110	rs747689249	Arg405Cys	1
111	rs748048663	Ala340Gly	1
112	rs748321836	Pro302Thr	1
113	rs748321836	Pro302Ala	1
114	rs748321836	Pro302Ser	1
115	rs749416566	Leu325Met	1
116	rs749416566	Leu325Val	0.992
117	rs750599207	Glu363Gln	0.997
118	rs750730071	Gln224Pro	1
119	rs750730071	Gln224Arg	0.919
120	rs750759798	Gly97Ser	1
121	rs751994544	His255Pro	0.989
122	rs751994544	His255Arg	0.966
123	rs752466989	Leu280Pro	1
124	rs753132857	Gln138Glu	0.998
125	rs754713426	Leu304Val	1
126	rs754713426	Leu304Phe	1
127	rs754919812	Gly144Ala	1
128	rs754919812	Gly144Val	1
129	rs754923594	Val277Ile	0.99
130	rs754923594	Val277Leu	0.957
131	rs754923594	Val277Phe	1
132	rs755119848	Cys118Arg	1
133	rs755265643	Ala229Val	1
134	rs757411620	Tyr141Cys	1
135	rs757704281	Glu362Lys	0.998
136	rs757774381	Trp90Ser	1
137	rs758081370	Arg43His	0.976
138	rs758913561	Glu291Lys	0.963
139	rs758951680	His115Asn	0.999
140	rs758951680	His115Tyr	1
141	rs759364715	Gly104Ser	0.983
142	rs760064068	Leu159Phe	1
143	rs760322437	Gln220His	1
144	rs760439238	Thr218Lys	0.954
145	rs760439238	Thr218Arg	0.986
146	rs760439238	Thr218Met	0.988
147	rs761358733	Trp109Arg	1
148	rs761937534	Phe270Leu	1
149	rs763016615	Asp191His	1
150	rs763469385	Lys397Thr	0.998
151	rs763745105	Ile307Leu	0.954
152	rs763745105	Ile307Val	0.929
153	rs763766830	Gln108Pro	1
154	rs763800857	Trp287Arg	1
155	rs764159693	Val399Met	1
156	rs764159693	Val399Leu	0.995
157	rs765523505	Glu362Ala	0.998
158	rs766200229	Gly263Asp	1
159	rs766200229	Gly263Ala	0.993
160	rs766298263	Val271Ile	0.999
161	rs766298263	Val271Leu	0.999
162	rs766298263	Val271Phe	1
163	rs766507724	Val227Met	0.999
164	rs766507724	Val227Leu	0.957
165	rs766706851	Glu398Gly	1
166	rs767107879	Arg81Cys	0.99
167	rs767963853	Arg41Trp	0.996
168	rs768328822	Leu241Met	1
169	rs768328822	Leu241Val	0.979
170	rs768835069	Ile299Val	0.997
171	rs769881973	Arg341Ser	0.992
172	rs769881973	Arg341Cys	1
173	rs770243512	Cys393Ser	1
174	rs770243512	Cys393Gly	1
175	rs771165150	Trp209Leu	0.95
176	rs771213011	Arg326Thr	0.999
177	rs771213011	Arg326Met	1
178	rs772204041	Ser64Tyr	0.99
179	rs773245641	Pro302Arg	1
180	rs773245641	Pro302Leu	1
181	rs773690389	Phe394Leu	0.957
182	rs773981009	Cys216Tyr	0.999
183	rs774121477	Thr343Ser	0.994
184	rs774955951	Gln384His	1
185	rs775273533	Tyr240His	0.945
186	rs775596829	Asp66Asn	1
187	rs776722055	Arg429Trp	0.993
188	rs776870228	Arg164Gln	0.993
189	rs777440834	Trp407Cys	1
190	rs778330895	Pro85Leu	1
191	rs778523534	Glu288Asp	1
192	rs778589587	Ser381Arg	0.998
193	rs778824900	Met330Thr	0.991
194	rs779746611	Gly385Asp	1
195	rs779746611	Gly385Ala	1
196	rs779746611	Gly385Val	1
197	rs779781285	Trp264Cys	1
198	rs780295269	Leu339Val	0.953
199	rs781376749	Asn230Asp	0.972
200	rs781601202	Gln204His	0.927
201	rs781700423	Leu318Arg	0.999
202	rs868753873	Leu451Pro	0.999
203	rs893921559	Tyr87His	0.992
204	rs893921559	Tyr87Asp	0.99
205	rs895070635	Leu416Pro	0.999
206	rs909594604	Arg338Lys	1
207	rs909594604	Arg338Met	1
208	rs929741717	Asn283Tyr	1
209	rs946153684	Leu152Val	0.996
210	rs949164129	Thr168Pro	1
211	rs949164129	Thr168Ala	0.999
212	rs951907131	Tyr225Asn	1
213	rs951907131	Tyr225His	1
214	rs951907131	Tyr225Asp	1
215	rs963958599	Asn396Asp	0.994
216	rs1041059613	Gln364Arg	0.98
217	rs1041279189	Val275Ala	0.998
218	rs1159403383	Arg331Ser	1
219	rs1159403383	Arg331Cys	1
220	rs1162934288	Thr142Ala	0.994
221	rs1162934288	Thr142Ser	0.968
222	rs1167664394	Arg38His	0.909
223	rs1167995273	Tyr87Cys	0.993
224	rs1169752232	Leu346Met	1
225	rs1177407521	Arg289Leu	0.991
226	rs1183524419	Gln329Lys	0.931
227	rs1184520323	Pro85Ser	1
228	rs1191126600	Ala266Asp	0.994
229	rs1192401965	Pro55Leu	0.997
230	rs1192921151	Gly58Arg	0.973
231	rs1192921151	Gly58Cys	0.998
232	rs1194857545	Glu282Gly	1
233	rs1199352514	Pro199Ala	0.961
234	rs1201830652	Ser148Pro	1
235	rs1207653012	Glu398Asp	0.964
236	rs1207653012	Glu398Asp	0.964
237	rs1208334112	Gly263Arg	1
238	rs1209978691	Gly375Asp	0.934
239	rs1210667721	His408Pro	0.934
240	rs1213046506	Trp90Arg	1
241	rs1213210232	Val360Ala	0.943
242	rs1213828181	Phe311Leu	0.98
243	rs1219022847	Ala219Thr	0.995
244	rs1221375035	Val356Met	1
245	rs1221375035	Val356Leu	0.997
246	rs1225944553	Asn396Ser	0.988
247	rs1237195910	Leu59Phe	0.987
248	rs1241059563	Thr361Arg	0.996
249	rs1241110746	Pro267Ser	1
250	rs1242475885	Leu325Pro	1
251	rs1242475885	Leu325Arg	0.995
252	rs1250456462	Glu377Lys	0.978
253	rs1268550499	Gly351Val	1
254	rs1268894911	Val399Ala	1
255	rs1269105159	Ser342Tyr	0.999
256	rs1271429083	Leu165Gln	1
257	rs1271429083	Leu165Pro	1
258	rs1271638992	Leu137Trp	1
259	rs1272063997	Val277Asp	1
260	rs1272063997	Val277Ala	0.999
261	rs1281057139	Leu321Phe	1
262	rs1281459393	Cys61Trp	1
263	rs1293207420	Leu312Pro	0.989
264	rs1296131841	Met67Ile	0.925
265	rs1298512253	Ser146Phe	1
266	rs1301966065	Val236Met	0.999
267	rs1302808260	Pro348His	1
268	rs1302808260	Pro348Leu	1
269	rs1302860359	Cys393Trp	1
270	rs1310737721	Cys70Trp	1
271	rs1319561036	Leu50Ser	1
272	rs1322290664	Gly254Val	0.939
273	rs1331409148	Pro195Leu	0.998
274	rs1339255632	Met1Lys	0.932
275	rs1339255632	Met1Thr	0.932
276	rs1341234286	Pro437Gln	0.911
277	rs1341422602	Phe65Ser	1
278	rs1342003668	Leu147Pro	1
279	rs1348050540	Leu244Phe	1
280	rs1351994626	Gly238Ser	1
281	rs1352444741	Gly417Cys	0.953
282	rs1364507294	Tyr392His	1
283	rs1366685396	Gly319Ser	0.989
284	rs1368040383	Thr142Ile	1
285	rs1369803107	Asp114Ala	0.986
286	rs1380779310	Ala219Gly	0.992
287	rs1380779310	Ala219Val	0.998
288	rs1382604138	Arg316Gly	1
289	rs1382604138	Arg316Cys	1
290	rs1387402382	Arg43Cys	0.993
291	rs1389933999	Phe394Tyr	0.997
292	rs1391121892	Pro121Thr	0.979
293	rs1392345482	Phe98Cys	0.955
294	rs1397072750	Ala294Asp	0.998
295	rs1397072750	Ala294Val	0.994
296	rs1399109296	Leu88Met	1
297	rs1400588485	Glu119Asp	0.978
298	rs1405223050	Ile299Lys	1
299	rs1405223050	Ile299Thr	1
300	rs1405568033	Gln329His	0.998
301	rs1407447389	Ser382Thr	0.989
302	rs1422595650	Gln117Lys	0.994
303	rs1422595650	Gln117Glu	0.999
304	rs1426918514	Pro273His	1
305	rs1426918514	Pro273Leu	0.993
306	rs1431587256	Asn290Lys	1
307	rs1439493776	Val94Met	0.985
308	rs1443165087	Glu362Asp	0.996
309	rs1446858641	Asn175Ser	1
310	rs1447106220	Lys373Asn	0.921
311	rs1452158129	Tyr281Ser	0.901
312	rs1452158129	Tyr281Cys	0.995
313	rs1457848658	Ser382Tyr	1
314	rs1457848658	Ser382Cys	1
315	rs1470786853	Thr168Ser	1
316	rs1472096312	Arg405His	0.996
317	rs1472096312	Arg405Leu	0.998
318	rs1475472835	Pro267Leu	1
319	rs1475672652	Leu10Gln	0.984
320	rs1475672652	Leu10Pro	0.984
321	rs1488778919	Tyr335Ser	1
322	rs1488778919	Tyr335Phe	0.985
323	rs1490061680	Val352Ala	0.998
324	rs1490770455	Gly265Glu	1
325	rs1490770455	Gly265Ala	1
326	rs1490770455	Gly265Val	1
327	rs1568519157	Arg113Ser	1
328	rs1568525938	Ile313Val	0.981
329	rs1568526187	Asp334Val	0.991
330	rs1600285930	Gly33Trp	0.994
331	rs1600285997	Trp39Arg	1
332	rs1600285997	Trp39Gly	0.999
333	rs1600308086	Tyr281His	0.949
334	rs1600309631	Thr301Pro	0.999
335	rs1600311278	Val347Gly	0.984
336	rs1600311473	Val355Gly	1
337	rs1966970464	Gly228Asp	0.989
338	rs1966970464	Gly228Val	0.989
339	rs1966970607	Ala229Thr	1
340	rs1966973819	His242Asn	1
341	rs1966996644	Pro273Thr	0.973
342	rs1967002101	Asn283Ser	0.984
343	rs1967026576	Trp296Cys	1
344	rs1967040961	Gly319Asp	0.998
345	rs1967040961	Gly319Val	0.994
346	rs1967043171	Arg328Gln	0.967
347	rs1967043171	Arg328Leu	1
348	rs1967045317	Arg336Trp	1
349	rs1967054889	His353Pro	1
350	rs1967060366	Phe379Ser	0.995
351	rs1967232588	Phe394Leu	0.957
352	rs1967232588	Phe394Val	0.998
353	rs1967245452	Gln400His	1
354	rs1967247063	Ile403Thr	0.931
355	rs1967247063	Ile403Ser	0.964
356	rs1967251703	Arg411His	0.947
357	rs1967252227	Arg413Cys	0.995
358	rs1975486722	Arg38Cys	0.991
359	rs1975487620	Tyr42Ser	1
360	rs1975527099	Asn62His	0.995
361	rs1975527099	Asn62Asp	0.968
362	rs1975533068	Pro89Leu	0.93
363	rs1975615524	Gly107Ser	0.999
364	rs1975615524	Gly107Cys	1
365	rs1975616522	Gly110Val	0.901
366	rs1975617313	His115Gln	1
367	rs1975618117	Glu119Lys	0.978
368	rs1975706542	Ala155Ser	0.997
369	rs1975737950	Arg169Lys	1
370	rs1975737950	Arg169Ile	1
371	rs1975739705	Ser179Phe	1
372	rs1975740224	Leu182Pro	1
373	rs2146095934	Ile303Thr	1
374	rs2146106199	Gly436Arg	0.986
375	rs2513581079	Leu35Gln	0.994
376	rs2513583496	Gly58Val	0.973
377	rs2513583656	Phe65Leu	0.999
378	rs2513583714	Tyr68His	1
379	rs2513583724	Tyr68Cys	1
380	rs2513583724	Tyr68Phe	0.999
381	rs2513583779	Cys70Tyr	1
382	rs2513583779	Cys70Phe	0.999
383	rs2513583861	Asn77His	0.991
384	rs2513584073	Cys84Tyr	0.999
385	rs2513584175	Leu88Arg	0.995
386	rs2513591045	Trp112Arg	1
387	rs2513591402	Pro121Gln	0.988
388	rs2513591609	Phe127Cys	0.988
389	rs2513597924	Leu134Trp	1
390	rs2513598054	Val139Gly	0.999
391	rs2513598133	Tyr141Asn	1
392	rs2513598440	Leu152Arg	0.999
393	rs2513598467	Leu153Pro	1
394	rs2513598491	Ala155Asp	1
395	rs2513598582	Ile158Thr	1
396	rs2513598606	Ile158Met	0.999
397	rs2513602043	Leu165Val	1
398	rs2513602093	His166Tyr	0.912
399	rs2513602133	Cys167Tyr	1
400	rs2513602163	Arg169Gly	1
401	rs2513602187	Asn170Ser	0.99
402	rs2513602263	Ile172Asn	1
403	rs2513602339	Phe177Leu	1
404	rs2513602362	Phe177Ser	1
405	rs2513602370	Phe177Leu	1
406	rs2513602415	Phe180Ser	1
407	rs2513602497	Ala184Thr	1
408	rs2513602563	Ile187Asn	1
409	rs2513602572	Leu188Val	1
410	rs2513602681	Asp191Val	1
411	rs2513602781	Leu194Pro	1
412	rs2513602794	Pro195Ser	0.999
413	rs2513602995	Tyr200Cys	0.987
414	rs2513611729	Cys216Ser	1
415	rs2513611729	Cys216Gly	1
416	rs2513611932	Cys226Ser	0.997
417	rs2513611950	Val227Glu	0.999
418	rs2513611950	Val227Ala	0.977
419	rs2513612038	Asn230Lys	0.938
420	rs2513612124	Leu234Pro	1
421	rs2513612176	Gly238Ala	1
422	rs2513612176	Gly238Val	1
423	rs2513612269	Leu241Arg	0.997
424	rs2513612344	Val246Glu	0.984
425	rs2513612505	Glu252Lys	1
426	rs2513612505	Glu252Gln	1
427	rs2513612624	Phe256Ser	1
428	rs2513612702	Tyr259His	1
429	rs2513612712	Tyr259Cys	1
430	rs2513614241	Ala266Pro	0.998
431	rs2513614312	Leu269Pro	1
432	rs2513614330	Phe270Cys	1
433	rs2513614403	Trp274Leu	1
434	rs2513614458	Arg278Gly	1
435	rs2513614598	Glu282Asp	0.999
436	rs2513614648	Thr284Arg	0.999
437	rs2513614648	Thr284Met	1
438	rs2513616302	Cys286Trp	1
439	rs2513616437	Ala294Thr	0.989
440	rs2513616497	Ile298Val	0.998
441	rs2513616506	Ile298Thr	1
442	rs2513616680	Leu308Val	0.992
443	rs2513617602	Ile317Thr	1
444	rs2513617602	Ile317Ser	1
445	rs2513617619	Leu318Phe	0.998
446	rs2513617711	Leu322Arg	0.949
447	rs2513618061	Leu337Pro	0.996
448	rs2513618061	Leu337Arg	0.976
449	rs2513618548	Leu339Gln	1
450	rs2513618559	Ala340Thr	1
451	rs2513618664	Thr343Arg	1
452	rs2513618707	Thr345Lys	1
453	rs2513618707	Thr345Met	1
454	rs2513618935	His353Tyr	1
455	rs2513619190	Arg366Trp	0.964
456	rs2513619256	Leu369Met	1
457	rs2513619296	Arg370His	1
458	rs2513619296	Arg370Pro	1
459	rs2513619400	Phe376Cys	1
460	rs2513619425	Ile378Phe	0.976
461	rs2513619432	Ile378Asn	0.976
462	rs2513625979	Gly385Ser	1
463	rs2513626072	Val390Ala	0.982
464	rs2513626093	Leu391Phe	1
465	rs2513626223	Lys397Glu	0.998
466	rs2513626256	Glu398Lys	0.931
467	rs2513626903	Glu402Gln	1
468	rs2513627022	Trp407Arg	1
469	rs2513627022	Trp407Gly	1
470	rs2513627436	Gly434Cys	0.979
471	rs2513627664	Gly449Trp	0.975
472	rs2513627941	Glu463Asp	0.999
473	rs1800437	Glu354Lys	1
474	rs1800437	Glu354Gln	1
475	rs1800437	Glu354Lys	1
476	rs1800437	Glu354Gln	1
477	rs1800437	Glu354Lys	1
478	rs1800437	Glu354Gln	1
479	rs13306402	Arg136Gly	0.918
480	rs13306403	Arg316Leu	1

## Sheet: 2. gnomAD AF <0.005 (397)
gnomAD AF <0.005 (397)
Variants surviving this step (cumulative scores for all filters applied through this point).
No.	dbSNP rsID	Amino acid change	PolyPhen-2	gnomAD AF
1	rs143490173	Asp66Gly	1	6.38823e-05
2	rs201980985	Cys286Arg	1	3.10211e-06
3	rs373040041	Leu304Pro	1	6.2e-07
4	rs373040041	Leu304Arg	1	0.00013577
5	rs756277634	Leu261His	0.999	3.16059e-05
6	rs764416244	Met140Thr	0.928	2.47905e-05
7	rs766119961	Arg404Ser	1	4.34903e-06
8	rs777065585	Arg300Trp	1	5.27091e-05
9	rs777826805	Arg370Ser	1	6.89757e-06
10	rs1283579295	Ala23Glu	0.938	6.33e-07
11	rs1466887239	Arg411Cys	0.995	8.10189e-06
12	rs1800437	Glu354Lys	1	6.21e-07
13	rs13306395	Glu463Gln	0.996	0.000379501
14	rs13306398	Gly198Cys	0.994	0.000248456
15	rs13306399	Cys46Ser	1	3.039e-05
16	rs13306402	Arg136Gly	0.918	6.21e-07
17	rs13306403	Arg316Leu	1	7.43574e-05
18	rs74751167	Arg341His	1	6.2e-07
19	rs74751167	Arg341Pro	1	4.65198e-05
20	rs74751167	Arg341Leu	0.996	4.34185e-06
21	rs76439420	Glu252Asp	1	0.00137047
22	rs78464711	Thr232Lys	0.983	1.85876e-06
23	rs78464711	Thr232Arg	0.995	6.2e-07
24	rs115338345	Arg101His	1	0.000686518
25	rs115338345	Arg101Pro	1	6.2e-07
26	rs115450421	Ile378Met	0.988	0.000384151
27	rs139215588	Arg190Gln	1	0.00102986
28	rs139952137	Cys46Arg	1	3.10985e-06
29	rs139952137	Cys46Gly	1	2.48771e-06
30	rs141898342	Ile172Val	0.998	2.35461e-05
31	rs142528936	Val99Ile	0.995	4.96769e-06
32	rs142528936	Val99Phe	1	3.47738e-05
33	rs142609845	Asp114Asn	0.976	3.09958e-06
34	rs143430880	Glu288Gly	1	0.00165528
35	rs146012706	Arg41Pro	0.911	7.43882e-06
36	rs146268621	Arg190Gly	1	2.47847e-06
37	rs199583937	Arg183Gln	1	0.000161718
38	rs199583937	Arg183Pro	1	3.71793e-06
39	rs199584358	Tyr231Cys	1	1.85877e-06
40	rs199584358	Tyr231Phe	0.999	6.2e-07
41	rs199645877	Pro348Thr	1	1.24019e-06
42	rs199645877	Pro348Ser	1	6.2e-07
43	rs200089159	Gly351Cys	1	3.72069e-06
44	rs200233374	Arg192His	0.986	2.66437e-05
45	rs200233374	Arg192Pro	0.902	1.23924e-06
46	rs200485112	Arg217His	1	6.2e-07
47	rs200485112	Arg217Leu	0.987	0.000236684
48	rs200562041	Leu262His	0.999	9.72983e-05
49	rs200602516	Glu282Lys	1	6.91789e-06
50	rs200979166	Leu13Phe	0.998	0.000133973
51	rs201212950	Asp191Glu	0.998	6.2e-07
52	rs201866455	Gln364Lys	0.961	6.23e-07
53	rs201866455	Gln364Glu	0.954	6.23e-07
54	rs367687469	Arg101Cys	1	7.44418e-05
55	rs373900520	Arg164Trp	1	0.000115251
56	rs375231803	Glu237Ala	0.989	1.8588e-06
57	rs376166364	Arg404His	0.999	2.73435e-05
58	rs376166364	Arg404Leu	1	6.21e-07
59	rs376369148	Thr223Asn	0.984	6.2e-07
60	rs376369148	Thr223Ile	0.938	8.67412e-06
61	rs529244730	Arg192Cys	0.999	1.48709e-05
62	rs529800464	Ser389Arg	1	6.2e-07
63	rs529800464	Ser389Arg	1	2.35475e-05
64	rs546589322	Leu344Gln	1	6.2e-07
65	rs546589322	Leu344Pro	1	8.68133e-06
66	rs546589322	Leu344Arg	1	2.48038e-06
67	rs552883021	Ala80Asp	0.997	6.2e-07
68	rs552883021	Ala80Gly	0.994	1.24045e-06
69	rs553327970	Gly104Val	0.998	4.3392e-06
70	rs557495616	Gly97Asp	1	1.24318e-06
71	rs557495616	Gly97Val	1	6.83747e-06
72	rs561341259	Arg336Gln	0.985	6.2e-07
73	rs561341259	Arg336Pro	0.995	0.000224326
74	rs562362862	Gly110Arg	0.901	6.2e-07
75	rs562362862	Gly110Arg	0.901	1.23953e-06
76	rs568378559	Val94Gly	0.999	3.13098e-06
77	rs577227780	Glu135Gly	0.98	1.24109e-06
78	rs577332018	Trp287Cys	1	2.10864e-05
79	rs745407393	Arg289Cys	1	1.86083e-06
80	rs745643138	Trp233Arg	1	6.2e-07
81	rs745643138	Trp233Arg	1	4.95675e-06
82	rs746004829	Arg331Leu	1	4.95715e-06
83	rs746029961	Ser64Pro	0.97	3.72341e-06
84	rs746529729	Gly202Ala	0.97	1.85884e-06
85	rs746529729	Gly202Val	0.999	3.09829e-06
86	rs746611074	Tyr240Cys	1	6.2e-07
87	rs746666145	Val388Ile	0.995	6.2e-07
88	rs746846121	Gly265Arg	1	8.05873e-06
89	rs746846121	Gly265Arg	1	6.2e-07
90	rs746846121	Gly265Trp	1	6.2e-07
91	rs746894609	Gly144Ser	1	1.67324e-05
92	rs747126972	Leu369Pro	1	4.38524e-06
93	rs747456820	Ile187Val	0.99	2.16887e-05
94	rs747456820	Ile187Phe	0.999	6.2e-07
95	rs747689249	Arg405Ser	0.945	1.67763e-05
96	rs747689249	Arg405Cys	1	6.21e-07
97	rs748048663	Ala340Gly	1	6.2e-07
98	rs748321836	Pro302Ala	1	6.2e-07
99	rs748321836	Pro302Ser	1	3.09926e-06
100	rs749416566	Leu325Met	1	1.23913e-06
101	rs749416566	Leu325Val	0.992	6.2e-07
102	rs750599207	Glu363Gln	0.997	1.24425e-06
103	rs750730071	Gln224Pro	1	6.81501e-06
104	rs750730071	Gln224Arg	0.919	6.2e-07
105	rs750759798	Gly97Ser	1	1.36801e-05
106	rs751994544	His255Arg	0.966	1.23926e-06
107	rs752466989	Leu280Pro	1	3.13357e-06
108	rs753132857	Gln138Glu	0.998	1.24016e-06
109	rs754713426	Leu304Phe	1	3.09948e-06
110	rs754919812	Gly144Ala	1	8.67533e-06
111	rs754919812	Gly144Val	1	6.2e-07
112	rs754923594	Val277Ile	0.99	1.24842e-06
113	rs754923594	Val277Leu	0.957	1.87277e-06
114	rs754923594	Val277Phe	1	1.87277e-06
115	rs755119848	Cys118Arg	1	8.68675e-06
116	rs755265643	Ala229Val	1	1.23918e-06
117	rs757704281	Glu362Lys	0.998	7.45864e-06
118	rs757774381	Trp90Ser	1	6.23e-07
119	rs758081370	Arg43His	0.976	6.2e-07
120	rs758913561	Glu291Lys	0.963	1.36367e-05
121	rs758951680	His115Asn	0.999	6.2e-07
122	rs758951680	His115Tyr	1	9.30093e-06
123	rs759364715	Gly104Ser	0.983	1.11588e-05
124	rs760064068	Leu159Phe	1	6.21e-07
125	rs760322437	Gln220His	1	1.36296e-05
126	rs760439238	Thr218Lys	0.954	5.7622e-05
127	rs760439238	Thr218Met	0.988	2.47819e-06
128	rs761358733	Trp109Arg	1	1.23952e-06
129	rs763016615	Asp191His	1	6.2e-07
130	rs763469385	Lys397Thr	0.998	7.43639e-06
131	rs763745105	Ile307Val	0.929	6.2e-07
132	rs763766830	Gln108Pro	1	6.2e-07
133	rs763800857	Trp287Arg	1	1.24046e-06
134	rs764159693	Val399Met	1	3.47562e-05
135	rs764159693	Val399Leu	0.995	1.2412e-06
136	rs765523505	Glu362Ala	0.998	6.22e-07
137	rs766200229	Gly263Asp	1	8.3683e-05
138	rs766200229	Gly263Ala	0.993	6.2e-07
139	rs766298263	Val271Ile	0.999	6.25e-07
140	rs766298263	Val271Phe	1	1.8755e-06
141	rs766507724	Val227Met	0.999	6.2e-07
142	rs766507724	Val227Leu	0.957	1.36313e-05
143	rs767107879	Arg81Cys	0.99	1.24052e-06
144	rs767963853	Arg41Trp	0.996	0.00010167
145	rs768328822	Leu241Met	1	6.2e-07
146	rs768328822	Leu241Val	0.979	4.95686e-06
147	rs768835069	Ile299Val	0.997	9.29703e-06
148	rs769881973	Arg341Ser	0.992	1.86071e-06
149	rs769881973	Arg341Cys	1	6.8221e-06
150	rs770243512	Cys393Ser	1	6.2e-07
151	rs770243512	Cys393Gly	1	3.09807e-06
152	rs771165150	Trp209Leu	0.95	4.33766e-06
153	rs771213011	Arg326Thr	0.999	2.4783e-06
154	rs772204041	Ser64Tyr	0.99	6.2e-07
155	rs773245641	Pro302Arg	1	6.2e-07
156	rs773245641	Pro302Leu	1	4.33869e-06
157	rs773690389	Phe394Leu	0.957	1.23922e-06
158	rs773981009	Cys216Tyr	0.999	6.2e-07
159	rs774121477	Thr343Ser	0.994	6.2e-07
160	rs774955951	Gln384His	1	3.20618e-06
161	rs775273533	Tyr240His	0.945	2.4795e-06
162	rs775596829	Asp66Asn	1	4.96134e-06
163	rs776722055	Arg429Trp	0.993	7.04339e-06
164	rs776870228	Arg164Gln	0.993	8.05542e-06
165	rs778330895	Pro85Leu	1	1.24191e-05
166	rs778589587	Ser381Arg	0.998	1.27681e-06
167	rs778824900	Met330Thr	0.991	3.71796e-06
168	rs779746611	Gly385Asp	1	6.2e-07
169	rs779746611	Gly385Ala	1	6.2e-07
170	rs779746611	Gly385Val	1	6.2e-07
171	rs779781285	Trp264Cys	1	7.43903e-06
172	rs780295269	Leu339Val	0.953	6.2e-07
173	rs781376749	Asn230Asp	0.972	6.81521e-06
174	rs781601202	Gln204His	0.927	6.2e-07
175	rs781700423	Leu318Arg	0.999	8.05455e-06
176	rs893921559	Tyr87Asp	0.99	6.21461e-06
177	rs895070635	Leu416Pro	0.999	6.26e-07
178	rs909594604	Arg338Lys	1	1.2394e-06
179	rs909594604	Arg338Met	1	7.43693e-06
180	rs929741717	Asn283Tyr	1	6.27e-07
181	rs946153684	Leu152Val	0.996	9.29809e-06
182	rs949164129	Thr168Pro	1	1.23928e-06
183	rs951907131	Tyr225Asn	1	6.2e-07
184	rs951907131	Tyr225His	1	1.23917e-06
185	rs951907131	Tyr225Asp	1	6.2e-07
186	rs1041059613	Gln364Arg	0.98	1.24544e-06
187	rs1041279189	Val275Ala	0.998	4.37133e-06
188	rs1159403383	Arg331Ser	1	1.85902e-06
189	rs1159403383	Arg331Cys	1	6.2e-07
190	rs1162934288	Thr142Ala	0.994	6.2e-07
191	rs1162934288	Thr142Ser	0.968	6.2e-07
192	rs1167664394	Arg38His	0.909	1.85948e-06
193	rs1177407521	Arg289Leu	0.991	1.24035e-06
194	rs1183524419	Gln329Lys	0.931	1.23915e-06
195	rs1191126600	Ala266Asp	0.994	1.26433e-06
196	rs1192401965	Pro55Leu	0.997	6.24295e-06
197	rs1192921151	Gly58Arg	0.973	2.51224e-06
198	rs1192921151	Gly58Cys	0.998	1.88432e-06
199	rs1194857545	Glu282Gly	1	1.2626e-06
200	rs1199352514	Pro199Ala	0.961	1.23915e-06
201	rs1207653012	Glu398Asp	0.964	1.23928e-06
202	rs1208334112	Gly263Arg	1	9.91631e-06
203	rs1209978691	Gly375Asp	0.934	1.26493e-06
204	rs1210667721	His408Pro	0.934	6.22e-07
205	rs1213046506	Trp90Arg	1	6.24e-07
206	rs1213210232	Val360Ala	0.943	1.24202e-06
207	rs1213828181	Phe311Leu	0.98	1.85882e-06
208	rs1221375035	Val356Leu	0.997	1.24094e-06
209	rs1225944553	Asn396Ser	0.988	1.85908e-06
210	rs1237195910	Leu59Phe	0.987	1.24451e-06
211	rs1241059563	Thr361Arg	0.996	6.21e-07
212	rs1241110746	Pro267Ser	1	6.29e-07
213	rs1242475885	Leu325Pro	1	6.2e-07
214	rs1242475885	Leu325Arg	0.995	6.2e-07
215	rs1250456462	Glu377Lys	0.978	5.07105e-06
216	rs1268894911	Val399Ala	1	6.21e-07
217	rs1269105159	Ser342Tyr	0.999	3.1009e-06
218	rs1271429083	Leu165Gln	1	6.2e-07
219	rs1271638992	Leu137Trp	1	6.2e-07
220	rs1272063997	Val277Asp	1	2.06017e-05
221	rs1272063997	Val277Ala	0.999	3.12148e-06
222	rs1281057139	Leu321Phe	1	6.2e-07
223	rs1281459393	Cys61Trp	1	1.24189e-06
224	rs1293207420	Leu312Pro	0.989	6.2e-07
225	rs1298512253	Ser146Phe	1	6.2e-07
226	rs1301966065	Val236Met	0.999	3.7175e-06
227	rs1302808260	Pro348His	1	6.2e-07
228	rs1302808260	Pro348Leu	1	8.06086e-06
229	rs1302860359	Cys393Trp	1	6.2e-07
230	rs1310737721	Cys70Trp	1	6.2e-07
231	rs1319561036	Leu50Ser	1	1.24996e-06
232	rs1322290664	Gly254Val	0.939	4.95715e-06
233	rs1341234286	Pro437Gln	0.911	2.57415e-06
234	rs1341422602	Phe65Ser	1	6.2e-07
235	rs1342003668	Leu147Pro	1	2.47874e-06
236	rs1348050540	Leu244Phe	1	6.2e-07
237	rs1351994626	Gly238Ser	1	6.2e-07
238	rs1352444741	Gly417Cys	0.953	6.26e-07
239	rs1364507294	Tyr392His	1	1.23922e-06
240	rs1366685396	Gly319Ser	0.989	6.2e-07
241	rs1368040383	Thr142Ile	1	7.43605e-06
242	rs1369803107	Asp114Ala	0.986	6.2e-07
243	rs1380779310	Ala219Gly	0.992	6.2e-07
244	rs1380779310	Ala219Val	0.998	6.2e-07
245	rs1382604138	Arg316Gly	1	6.2e-07
246	rs1382604138	Arg316Cys	1	6.2e-07
247	rs1387402382	Arg43Cys	0.993	1.23993e-06
248	rs1389933999	Phe394Tyr	0.997	6.2e-07
249	rs1391121892	Pro121Thr	0.979	6.22e-07
250	rs1392345482	Phe98Cys	0.955	6.21e-07
251	rs1397072750	Ala294Val	0.994	4.95865e-06
252	rs1399109296	Leu88Met	1	6.22e-07
253	rs1400588485	Glu119Asp	0.978	1.24229e-06
254	rs1405223050	Ile299Lys	1	6.2e-07
255	rs1405223050	Ile299Thr	1	4.33807e-06
256	rs1405568033	Gln329His	0.998	1.23929e-06
257	rs1407447389	Ser382Thr	0.989	7.03061e-06
258	rs1426918514	Pro273His	1	6.24e-07
259	rs1431587256	Asn290Lys	1	6.2e-07
260	rs1439493776	Val94Met	0.985	6.29e-07
261	rs1447106220	Lys373Asn	0.921	1.89388e-06
262	rs1452158129	Tyr281Cys	0.995	1.8987e-06
263	rs1457848658	Ser382Tyr	1	5.11296e-06
264	rs1457848658	Ser382Cys	1	1.91736e-06
265	rs1470786853	Thr168Ser	1	6.2e-07
266	rs1472096312	Arg405His	0.996	1.24277e-06
267	rs1475472835	Pro267Leu	1	6.29e-07
268	rs1475672652	Leu10Pro	0.984	6.32e-07
269	rs1488778919	Tyr335Ser	1	6.2e-07
270	rs1490061680	Val352Ala	0.998	6.2e-07
271	rs1490770455	Gly265Glu	1	6.32e-07
272	rs1490770455	Gly265Ala	1	1.26464e-06
273	rs1568525938	Ile313Val	0.981	6.2e-07
274	rs1600285930	Gly33Trp	0.994	3.09895e-06
275	rs1600285997	Trp39Arg	1	6.2e-07
276	rs1600285997	Trp39Gly	0.999	6.2e-07
277	rs1966970464	Gly228Asp	0.989	2.4782e-06
278	rs1966970464	Gly228Val	0.989	6.2e-07
279	rs1966973819	His242Asn	1	1.23924e-06
280	rs1967002101	Asn283Ser	0.984	6.31e-07
281	rs1967026576	Trp296Cys	1	6.2e-07
282	rs1967040961	Gly319Val	0.994	6.2e-07
283	rs1967043171	Arg328Gln	0.967	6.2e-07
284	rs1967043171	Arg328Leu	1	1.2393e-06
285	rs1967045317	Arg336Trp	1	6.2e-07
286	rs1967232588	Phe394Leu	0.957	6.2e-07
287	rs1967247063	Ile403Ser	0.964	6.21e-07
288	rs1967251703	Arg411His	0.947	1.24664e-06
289	rs1975486722	Arg38Cys	0.991	6.2e-07
290	rs1975527099	Asn62Asp	0.968	1.86244e-06
291	rs1975615524	Gly107Ser	0.999	6.2e-07
292	rs1975616522	Gly110Val	0.901	6.2e-07
293	rs1975706542	Ala155Ser	0.997	6.2e-07
294	rs1975737950	Arg169Ile	1	3.71747e-06
295	rs1975739705	Ser179Phe	1	6.2e-07
296	rs2146095934	Ile303Thr	1	1.23971e-06
297	rs2146106199	Gly436Arg	0.986	6.43e-07
298	rs2513581079	Leu35Gln	0.994	6.2e-07
299	rs2513583496	Gly58Val	0.973	6.24e-07
300	rs2513583656	Phe65Leu	0.999	1.2405e-06
301	rs2513583714	Tyr68His	1	6.2e-07
302	rs2513583724	Tyr68Cys	1	6.2e-07
303	rs2513583724	Tyr68Phe	0.999	1.24015e-06
304	rs2513583779	Cys70Tyr	1	6.2e-07
305	rs2513583779	Cys70Phe	0.999	1.24e-06
306	rs2513583861	Asn77His	0.991	1.24006e-06
307	rs2513584073	Cys84Tyr	0.999	1.24138e-06
308	rs2513584175	Leu88Arg	0.995	6.23e-07
309	rs2513591045	Trp112Arg	1	6.2e-07
310	rs2513591402	Pro121Gln	0.988	6.22e-07
311	rs2513591609	Phe127Cys	0.988	1.27266e-06
312	rs2513597924	Leu134Trp	1	1.2412e-06
313	rs2513598054	Val139Gly	0.999	6.2e-07
314	rs2513598133	Tyr141Asn	1	6.2e-07
315	rs2513598440	Leu152Arg	0.999	6.2e-07
316	rs2513598467	Leu153Pro	1	6.2e-07
317	rs2513598491	Ala155Asp	1	1.24033e-06
318	rs2513598582	Ile158Thr	1	6.2e-07
319	rs2513598606	Ile158Met	0.999	6.21e-07
320	rs2513602043	Leu165Val	1	1.85874e-06
321	rs2513602093	His166Tyr	0.912	6.2e-07
322	rs2513602133	Cys167Tyr	1	6.2e-07
323	rs2513602163	Arg169Gly	1	6.2e-07
324	rs2513602187	Asn170Ser	0.99	6.2e-07
325	rs2513602263	Ile172Asn	1	1.23915e-06
326	rs2513602339	Phe177Leu	1	6.2e-07
327	rs2513602362	Phe177Ser	1	4.33705e-06
328	rs2513602370	Phe177Leu	1	6.2e-07
329	rs2513602415	Phe180Ser	1	6.2e-07
330	rs2513602497	Ala184Thr	1	6.2e-07
331	rs2513602563	Ile187Asn	1	1.2392e-06
332	rs2513602572	Leu188Val	1	6.2e-07
333	rs2513602681	Asp191Val	1	6.2e-07
334	rs2513602781	Leu194Pro	1	6.2e-07
335	rs2513602794	Pro195Ser	0.999	1.85875e-06
336	rs2513602995	Tyr200Cys	0.987	6.2e-07
337	rs2513611729	Cys216Ser	0.999	6.2e-07
338	rs2513611729	Cys216Gly	0.999	6.2e-07
339	rs2513611932	Cys226Ser	0.997	1.2391e-06
340	rs2513611950	Val227Glu	0.999	1.23913e-06
341	rs2513611950	Val227Ala	0.977	6.2e-07
342	rs2513612038	Asn230Lys	0.938	6.2e-07
343	rs2513612124	Leu234Pro	1	3.71731e-06
344	rs2513612176	Gly238Ala	1	6.2e-07
345	rs2513612176	Gly238Val	1	1.23966e-06
346	rs2513612269	Leu241Arg	0.997	6.2e-07
347	rs2513612344	Val246Glu	0.984	6.2e-07
348	rs2513612505	Glu252Gln	1	1.23914e-06
349	rs2513612624	Phe256Ser	1	6.2e-07
350	rs2513612702	Tyr259His	1	6.2e-07
351	rs2513612712	Tyr259Cys	1	6.2e-07
352	rs2513614241	Ala266Pro	0.998	1.89495e-06
353	rs2513614312	Leu269Pro	1	1.25311e-06
354	rs2513614330	Phe270Cys	1	6.25e-07
355	rs2513614458	Arg278Gly	1	6.44e-07
356	rs2513614598	Glu282Asp	0.999	6.42e-07
357	rs2513614648	Thr284Arg	0.999	1.27053e-06
358	rs2513614648	Thr284Met	1	1.27053e-06
359	rs2513616302	Cys286Trp	1	3.72224e-06
360	rs2513616437	Ala294Thr	0.989	6.2e-07
361	rs2513616497	Ile298Val	0.998	1.85929e-06
362	rs2513616506	Ile298Thr	1	2.47903e-06
363	rs2513616680	Leu308Val	0.992	6.2e-07
364	rs2513617602	Ile317Thr	1	6.2e-07
365	rs2513617602	Ile317Ser	1	6.2e-07
366	rs2513617619	Leu318Phe	0.998	6.2e-07
367	rs2513617711	Leu322Arg	0.949	6.2e-07
368	rs2513618061	Leu337Pro	0.996	6.2e-07
369	rs2513618061	Leu337Arg	0.976	6.2e-07
370	rs2513618548	Leu339Gln	1	6.2e-07
371	rs2513618559	Ala340Thr	1	1.24038e-06
372	rs2513618664	Thr343Arg	1	1.86029e-06
373	rs2513618707	Thr345Lys	1	6.2e-07
374	rs2513618707	Thr345Met	1	6.2e-07
375	rs2513618935	His353Tyr	1	2.4806e-06
376	rs2513619190	Arg366Trp	0.964	6.24e-07
377	rs2513619256	Leu369Met	1	6.26e-07
378	rs2513619296	Arg370His	1	6.28e-07
379	rs2513619296	Arg370Pro	1	6.28e-07
380	rs2513619400	Phe376Cys	1	6.33e-07
381	rs2513619425	Ile378Phe	0.976	6.35e-07
382	rs2513619432	Ile378Asn	0.976	6.35e-07
383	rs2513626072	Val390Ala	0.982	2.47845e-06
384	rs2513626093	Leu391Phe	1	6.2e-07
385	rs2513626223	Lys397Glu	0.998	6.2e-07
386	rs2513626256	Glu398Lys	0.931	1.23936e-06
387	rs2513626903	Glu402Gln	1	6.21e-07
388	rs2513627022	Trp407Arg	1	6.22e-07
389	rs2513627022	Trp407Gly	1	6.22e-07
390	rs2513627436	Gly434Cys	0.979	1.28562e-06
391	rs2513627664	Gly449Trp	0.975	6.42e-07
392	rs2513627941	Glu463Asp	0.999	6.41e-07
393	rs1800437	Glu354Lys	1	6.21e-07
394	rs1800437	Glu354Lys	1	6.21e-07
395	rs1800437	Glu354Lys	1	6.21e-07
396	rs13306402	Arg136Gly	0.918	6.21e-07
397	rs13306403	Arg316Leu	1	7.43574e-05

## Sheet: 3. SIFT <0.05 (253)
SIFT <0.05 (253)
Variants surviving this step (cumulative scores for all filters applied through this point).
No.	dbSNP rsID	Amino acid change	Variant (GRCh38)	PolyPhen-2	gnomAD AF	SIFT
1	rs143490173	Asp66Gly	19-45671309-A-G	1	6.38823e-05	0
2	rs201980985	Cys286Arg	19-45677711-T-C	1	3.10211e-06	0
3	rs373040041	Leu304Pro	19-45677766-T-C	1	6.2e-07	0.01
4	rs373040041	Leu304Arg	19-45677766-T-G	1	0.00013577	0.01
5	rs764416244	Met140Thr	19-45674108-T-C	0.928	2.47905e-05	0.02
6	rs766119961	Arg404Ser	19-45681744-C-A	1	4.34903e-06	0.03
7	rs777065585	Arg300Trp	19-45677753-C-T	1	5.27091e-05	0
8	rs777826805	Arg370Ser	19-45678182-C-A	1	6.89757e-06	0.01
9	rs13306395	Glu463Gln	19-45681921-G-C	0.996	0.000379501	0
10	rs13306403	Arg316Leu	19-45677928-G-T	1	7.43574e-05	0.03
11	rs74751167	Arg341His	19-45678096-G-A	1	6.2e-07	0.02
12	rs74751167	Arg341Pro	19-45678096-G-C	1	4.65198e-05	0.01
13	rs74751167	Arg341Leu	19-45678096-G-T	0.996	4.34185e-06	0.02
14	rs76439420	Glu252Asp	19-45677071-G-C	1	0.00137047	0
15	rs115338345	Arg101His	19-45672872-G-A	1	0.000686518	0.01
16	rs115338345	Arg101Pro	19-45672872-G-C	1	6.2e-07	0.01
17	rs115450421	Ile378Met	19-45678208-C-G	0.988	0.000384151	0.03
18	rs139952137	Cys46Arg	19-45670698-T-C	1	3.10985e-06	0.03
19	rs141898342	Ile172Val	19-45674707-A-G	0.998	2.35461e-05	0
20	rs142528936	Val99Phe	19-45672865-G-T	1	3.47738e-05	0.02
21	rs199583937	Arg183Gln	19-45674741-G-A	1	0.000161718	0.03
22	rs199583937	Arg183Pro	19-45674741-G-C	1	3.71793e-06	0.01
23	rs199584358	Tyr231Cys	19-45677007-A-G	1	1.85877e-06	0.01
24	rs199584358	Tyr231Phe	19-45677007-A-T	0.999	6.2e-07	0.02
25	rs199645877	Pro348Thr	19-45678116-C-A	1	1.24019e-06	0.03
26	rs199645877	Pro348Ser	19-45678116-C-T	1	6.2e-07	0.04
27	rs200089159	Gly351Cys	19-45678125-G-T	1	3.72069e-06	0
28	rs200485112	Arg217His	19-45676965-G-A	1	6.2e-07	0.01
29	rs200485112	Arg217Leu	19-45676965-G-T	0.987	0.000236684	0.01
30	rs200562041	Leu262His	19-45677100-T-A	0.999	9.72983e-05	0
31	rs200602516	Glu282Lys	19-45677373-G-A	1	6.91789e-06	0
32	rs200979166	Leu13Phe	19-45669557-C-T	0.998	0.000133973	0.04
33	rs201212950	Asp191Glu	19-45674766-C-A	0.998	6.2e-07	0
34	rs367687469	Arg101Cys	19-45672871-C-T	1	7.44418e-05	0
35	rs373900520	Arg164Trp	19-45674683-C-T	1	0.000115251	0.01
36	rs375231803	Glu237Ala	19-45677025-A-C	0.989	1.8588e-06	0
37	rs376166364	Arg404His	19-45681745-G-A	0.999	2.73435e-05	0.03
38	rs376369148	Thr223Asn	19-45676983-C-A	0.984	6.2e-07	0.02
39	rs529800464	Ser389Arg	19-45681618-C-A	1	6.2e-07	0.01
40	rs529800464	Ser389Arg	19-45681618-C-G	1	2.35475e-05	0.01
41	rs546589322	Leu344Gln	19-45678105-T-A	1	6.2e-07	0
42	rs546589322	Leu344Pro	19-45678105-T-C	1	8.68133e-06	0
43	rs546589322	Leu344Arg	19-45678105-T-G	1	2.48038e-06	0
44	rs552883021	Ala80Asp	19-45671351-C-A	0.997	6.2e-07	0.02
45	rs557495616	Gly97Val	19-45672860-G-T	1	6.83747e-06	0.04
46	rs577332018	Trp287Cys	19-45677716-G-C	1	2.10864e-05	0
47	rs745643138	Trp233Arg	19-45677012-T-A	1	6.2e-07	0
48	rs745643138	Trp233Arg	19-45677012-T-C	1	4.95675e-06	0
49	rs746029961	Ser64Pro	19-45671302-T-C	0.97	3.72341e-06	0.04
50	rs746611074	Tyr240Cys	19-45677034-A-G	1	6.2e-07	0
51	rs746666145	Val388Ile	19-45681613-G-A	0.995	6.2e-07	0
52	rs746846121	Gly265Arg	19-45677108-G-A	1	8.05873e-06	0.01
53	rs746846121	Gly265Arg	19-45677108-G-C	1	6.2e-07	0.01
54	rs746846121	Gly265Trp	19-45677108-G-T	1	6.2e-07	0
55	rs746894609	Gly144Ser	19-45674119-G-A	1	1.67324e-05	0
56	rs747456820	Ile187Phe	19-45674752-A-T	0.999	6.2e-07	0.04
57	rs747689249	Arg405Ser	19-45681747-C-A	0.945	1.67763e-05	0.02
58	rs747689249	Arg405Cys	19-45681747-C-T	1	6.21e-07	0
59	rs748048663	Ala340Gly	19-45678093-C-G	1	6.2e-07	0
60	rs748321836	Pro302Ala	19-45677759-C-G	1	6.2e-07	0
61	rs748321836	Pro302Ser	19-45677759-C-T	1	3.09926e-06	0
62	rs749416566	Leu325Met	19-45677954-C-A	1	1.23913e-06	0.02
63	rs749416566	Leu325Val	19-45677954-C-G	0.992	6.2e-07	0.02
64	rs750599207	Glu363Gln	19-45678161-G-C	0.997	1.24425e-06	0.04
65	rs750730071	Gln224Pro	19-45676986-A-C	1	6.81501e-06	0.02
66	rs754919812	Gly144Ala	19-45674120-G-C	1	8.67533e-06	0
67	rs754919812	Gly144Val	19-45674120-G-T	1	6.2e-07	0
68	rs754923594	Val277Phe	19-45677358-G-T	1	1.87277e-06	0.01
69	rs755119848	Cys118Arg	19-45672922-T-C	1	8.68675e-06	0
70	rs755265643	Ala229Val	19-45677001-C-T	1	1.23918e-06	0.04
71	rs757704281	Glu362Lys	19-45678158-G-A	0.998	7.45864e-06	0.03
72	rs757774381	Trp90Ser	19-45671381-G-C	1	6.23e-07	0.01
73	rs761358733	Trp109Arg	19-45672895-T-C	1	1.23952e-06	0
74	rs763016615	Asp191His	19-45674764-G-C	1	6.2e-07	0
75	rs763800857	Trp287Arg	19-45677714-T-C	1	1.24046e-06	0
76	rs764159693	Val399Met	19-45681729-G-A	1	3.47562e-05	0
77	rs764159693	Val399Leu	19-45681729-G-C	0.995	1.2412e-06	0
78	rs765523505	Glu362Ala	19-45678159-A-C	0.998	6.22e-07	0.03
79	rs766200229	Gly263Asp	19-45677103-G-A	1	8.3683e-05	0
80	rs766200229	Gly263Ala	19-45677103-G-C	0.993	6.2e-07	0
81	rs766298263	Val271Ile	19-45677340-G-A	0.999	6.25e-07	0
82	rs766298263	Val271Phe	19-45677340-G-T	1	1.8755e-06	0
83	rs766507724	Val227Met	19-45676994-G-A	0.999	6.2e-07	0.01
84	rs766507724	Val227Leu	19-45676994-G-T	0.957	1.36313e-05	0.04
85	rs767107879	Arg81Cys	19-45671353-C-T	0.99	1.24052e-06	0.04
86	rs767963853	Arg41Trp	19-45670683-C-T	0.996	0.00010167	0.04
87	rs768328822	Leu241Met	19-45677036-C-A	1	6.2e-07	0
88	rs768328822	Leu241Val	19-45677036-C-G	0.979	4.95686e-06	0
89	rs769881973	Arg341Ser	19-45678095-C-A	0.992	1.86071e-06	0.02
90	rs769881973	Arg341Cys	19-45678095-C-T	1	6.8221e-06	0
91	rs771213011	Arg326Thr	19-45677958-G-C	0.999	2.4783e-06	0.01
92	rs772204041	Ser64Tyr	19-45671303-C-A	0.99	6.2e-07	0.01
93	rs773245641	Pro302Arg	19-45677760-C-G	1	6.2e-07	0
94	rs773245641	Pro302Leu	19-45677760-C-T	1	4.33869e-06	0
95	rs773690389	Phe394Leu	19-45681633-C-G	0.957	1.23922e-06	0
96	rs773981009	Cys216Tyr	19-45676962-G-A	0.999	6.2e-07	0
97	rs774121477	Thr343Ser	19-45678101-A-T	0.994	6.2e-07	0
98	rs775273533	Tyr240His	19-45677033-T-C	0.945	2.4795e-06	0
99	rs775596829	Asp66Asn	19-45671308-G-A	1	4.96134e-06	0
100	rs778330895	Pro85Leu	19-45671366-C-T	1	1.24191e-05	0
101	rs778589587	Ser381Arg	19-45678217-C-A	0.998	1.27681e-06	0.02
102	rs779746611	Gly385Asp	19-45681605-G-A	1	6.2e-07	0
103	rs779746611	Gly385Ala	19-45681605-G-C	1	6.2e-07	0
104	rs779746611	Gly385Val	19-45681605-G-T	1	6.2e-07	0
105	rs779781285	Trp264Cys	19-45677107-G-C	1	7.43903e-06	0
106	rs780295269	Leu339Val	19-45678089-C-G	0.953	6.2e-07	0
107	rs781376749	Asn230Asp	19-45677003-A-G	0.972	6.81521e-06	0
108	rs781700423	Leu318Arg	19-45677934-T-G	0.999	8.05455e-06	0
109	rs893921559	Tyr87Asp	19-45671371-T-G	0.99	6.21461e-06	0
110	rs909594604	Arg338Lys	19-45677994-G-A	1	1.2394e-06	0
111	rs909594604	Arg338Met	19-45677994-G-T	1	7.43693e-06	0
112	rs929741717	Asn283Tyr	19-45677376-A-T	1	6.27e-07	0.01
113	rs946153684	Leu152Val	19-45674143-C-G	0.996	9.29809e-06	0
114	rs949164129	Thr168Pro	19-45674695-A-C	1	1.23928e-06	0
115	rs951907131	Tyr225Asn	19-45676988-T-A	1	6.2e-07	0
116	rs951907131	Tyr225His	19-45676988-T-C	1	1.23917e-06	0
117	rs951907131	Tyr225Asp	19-45676988-T-G	1	6.2e-07	0
118	rs1162934288	Thr142Ala	19-45674113-A-G	0.994	6.2e-07	0
119	rs1162934288	Thr142Ser	19-45674113-A-T	0.968	6.2e-07	0
120	rs1167664394	Arg38His	19-45670675-G-A	0.909	1.85948e-06	0.04
121	rs1192921151	Gly58Cys	19-45670734-G-T	0.998	1.88432e-06	0.01
122	rs1194857545	Glu282Gly	19-45677374-A-G	1	1.2626e-06	0
123	rs1207653012	Glu398Asp	19-45681645-G-C	0.964	1.23928e-06	0
124	rs1208334112	Gly263Arg	19-45677102-G-C	1	9.91631e-06	0
125	rs1213046506	Trp90Arg	19-45671380-T-C	1	6.24e-07	0
126	rs1213828181	Phe311Leu	19-45677914-C-A	0.98	1.85882e-06	0
127	rs1241110746	Pro267Ser	19-45677328-C-T	1	6.29e-07	0
128	rs1242475885	Leu325Pro	19-45677955-T-C	1	6.2e-07	0
129	rs1242475885	Leu325Arg	19-45677955-T-G	0.995	6.2e-07	0
130	rs1250456462	Glu377Lys	19-45678203-G-A	0.978	5.07105e-06	0.03
131	rs1268894911	Val399Ala	19-45681730-T-C	1	6.21e-07	0
132	rs1269105159	Ser342Tyr	19-45678099-C-A	0.999	3.1009e-06	0
133	rs1271429083	Leu165Gln	19-45674687-T-A	1	6.2e-07	0
134	rs1271638992	Leu137Trp	19-45674099-T-G	1	6.2e-07	0.01
135	rs1272063997	Val277Asp	19-45677359-T-A	1	2.06017e-05	0.01
136	rs1281057139	Leu321Phe	19-45677942-C-T	1	6.2e-07	0.02
137	rs1281459393	Cys61Trp	19-45671295-T-G	1	1.24189e-06	0
138	rs1293207420	Leu312Pro	19-45677916-T-C	0.989	6.2e-07	0.02
139	rs1298512253	Ser146Phe	19-45674126-C-T	1	6.2e-07	0
140	rs1301966065	Val236Met	19-45677021-G-A	0.999	3.7175e-06	0
141	rs1302808260	Pro348His	19-45678117-C-A	1	6.2e-07	0.01
142	rs1302860359	Cys393Trp	19-45681630-C-G	1	6.2e-07	0.02
143	rs1310737721	Cys70Trp	19-45671322-C-G	1	6.2e-07	0
144	rs1319561036	Leu50Ser	19-45670711-T-C	1	1.24996e-06	0.01
145	rs1341422602	Phe65Ser	19-45671306-T-C	1	6.2e-07	0
146	rs1342003668	Leu147Pro	19-45674129-T-C	1	2.47874e-06	0.02
147	rs1348050540	Leu244Phe	19-45677045-C-T	1	6.2e-07	0
148	rs1351994626	Gly238Ser	19-45677027-G-A	1	6.2e-07	0
149	rs1364507294	Tyr392His	19-45681625-T-C	1	1.23922e-06	0
150	rs1368040383	Thr142Ile	19-45674114-C-T	1	7.43605e-06	0
151	rs1369803107	Asp114Ala	19-45672911-A-C	0.986	6.2e-07	0.04
152	rs1382604138	Arg316Gly	19-45677927-C-G	1	6.2e-07	0.03
153	rs1382604138	Arg316Cys	19-45677927-C-T	1	6.2e-07	0
154	rs1389933999	Phe394Tyr	19-45681632-T-A	0.997	6.2e-07	0
155	rs1399109296	Leu88Met	19-45671374-C-A	1	6.22e-07	0
156	rs1405223050	Ile299Lys	19-45677751-T-A	1	6.2e-07	0
157	rs1405223050	Ile299Thr	19-45677751-T-C	1	4.33807e-06	0.01
158	rs1407447389	Ser382Thr	19-45678218-T-A	0.989	7.03061e-06	0
159	rs1426918514	Pro273His	19-45677347-C-A	1	6.24e-07	0.02
160	rs1431587256	Asn290Lys	19-45677725-C-A	1	6.2e-07	0
161	rs1447106220	Lys373Asn	19-45678193-G-T	0.921	1.89388e-06	0.02
162	rs1457848658	Ser382Tyr	19-45678219-C-A	1	5.11296e-06	0
163	rs1457848658	Ser382Cys	19-45678219-C-G	1	1.91736e-06	0
164	rs1470786853	Thr168Ser	19-45674696-C-G	1	6.2e-07	0
165	rs1472096312	Arg405His	19-45681748-G-A	0.996	1.24277e-06	0.02
166	rs1475472835	Pro267Leu	19-45677329-C-T	1	6.29e-07	0
167	rs1475672652	Leu10Pro	19-45669549-T-C	0.984	6.32e-07	0.01
168	rs1490061680	Val352Ala	19-45678129-T-C	0.998	6.2e-07	0.04
169	rs1490770455	Gly265Glu	19-45677323-G-A	1	6.32e-07	0.01
170	rs1600285930	Gly33Trp	19-45670659-G-T	0.994	3.09895e-06	0.01
171	rs1600285997	Trp39Arg	19-45670677-T-C	1	6.2e-07	0
172	rs1600285997	Trp39Gly	19-45670677-T-G	0.999	6.2e-07	0
173	rs1966973819	His242Asn	19-45677039-C-A	1	1.23924e-06	0.03
174	rs1967002101	Asn283Ser	19-45677377-A-G	0.984	6.31e-07	0.03
175	rs1967026576	Trp296Cys	19-45677743-G-T	1	6.2e-07	0
176	rs1967045317	Arg336Trp	19-45677987-C-T	1	6.2e-07	0.01
177	rs1967232588	Phe394Leu	19-45681631-T-C	0.957	6.2e-07	0
178	rs1967247063	Ile403Ser	19-45681742-T-G	0.964	6.21e-07	0.01
179	rs1975615524	Gly107Ser	19-45672889-G-A	0.999	6.2e-07	0
180	rs1975706542	Ala155Ser	19-45674152-G-T	0.997	6.2e-07	0
181	rs1975737950	Arg169Ile	19-45674699-G-T	1	3.71747e-06	0
182	rs1975739705	Ser179Phe	19-45674729-C-T	1	6.2e-07	0
183	rs2146095934	Ile303Thr	19-45677763-T-C	1	1.23971e-06	0.01
184	rs2513583496	Gly58Val	19-45671285-G-T	0.973	6.24e-07	0.03
185	rs2513583656	Phe65Leu	19-45671307-C-G	0.999	1.2405e-06	0.02
186	rs2513583714	Tyr68His	19-45671314-T-C	1	6.2e-07	0.01
187	rs2513583724	Tyr68Cys	19-45671315-A-G	1	6.2e-07	0.01
188	rs2513583779	Cys70Tyr	19-45671321-G-A	1	6.2e-07	0
189	rs2513583779	Cys70Phe	19-45671321-G-T	0.999	1.24e-06	0
190	rs2513583861	Asn77His	19-45671341-A-C	0.991	1.24006e-06	0.04
191	rs2513584073	Cys84Tyr	19-45671363-G-A	0.999	1.24138e-06	0
192	rs2513584175	Leu88Arg	19-45671375-T-G	0.995	6.23e-07	0
193	rs2513597924	Leu134Trp	19-45674090-T-G	1	1.2412e-06	0.02
194	rs2513598054	Val139Gly	19-45674105-T-G	0.999	6.2e-07	0
195	rs2513598133	Tyr141Asn	19-45674110-T-A	1	6.2e-07	0
196	rs2513598440	Leu152Arg	19-45674144-T-G	0.999	6.2e-07	0
197	rs2513598467	Leu153Pro	19-45674147-T-C	1	6.2e-07	0.01
198	rs2513598491	Ala155Asp	19-45674153-C-A	1	1.24033e-06	0
199	rs2513598582	Ile158Thr	19-45674162-T-C	1	6.2e-07	0.01
200	rs2513598606	Ile158Met	19-45674163-C-G	0.999	6.21e-07	0.02
201	rs2513602043	Leu165Val	19-45674686-C-G	1	1.85874e-06	0
202	rs2513602093	His166Tyr	19-45674689-C-T	0.912	6.2e-07	0
203	rs2513602133	Cys167Tyr	19-45674693-G-A	1	6.2e-07	0
204	rs2513602163	Arg169Gly	19-45674698-A-G	1	6.2e-07	0
205	rs2513602187	Asn170Ser	19-45674702-A-G	0.99	6.2e-07	0
206	rs2513602263	Ile172Asn	19-45674708-T-A	1	1.23915e-06	0
207	rs2513602339	Phe177Leu	19-45674722-T-C	1	6.2e-07	0
208	rs2513602362	Phe177Ser	19-45674723-T-C	1	4.33705e-06	0
209	rs2513602370	Phe177Leu	19-45674724-C-G	1	6.2e-07	0
210	rs2513602415	Phe180Ser	19-45674732-T-C	1	6.2e-07	0
211	rs2513602681	Asp191Val	19-45674765-A-T	1	6.2e-07	0
212	rs2513602781	Leu194Pro	19-45674774-T-C	1	6.2e-07	0.01
213	rs2513611729	Cys216Ser	19-45676961-T-A	0.999	6.2e-07	0
214	rs2513611729	Cys216Gly	19-45676961-T-G	0.999	6.2e-07	0
215	rs2513611950	Val227Glu	19-45676995-T-A	0.999	1.23913e-06	0
216	rs2513611950	Val227Ala	19-45676995-T-C	0.977	6.2e-07	0.01
217	rs2513612038	Asn230Lys	19-45677005-C-A	0.938	6.2e-07	0
218	rs2513612124	Leu234Pro	19-45677016-T-C	1	3.71731e-06	0
219	rs2513612176	Gly238Ala	19-45677028-G-C	1	6.2e-07	0
220	rs2513612176	Gly238Val	19-45677028-G-T	1	1.23966e-06	0
221	rs2513612269	Leu241Arg	19-45677037-T-G	0.997	6.2e-07	0
222	rs2513612505	Glu252Gln	19-45677069-G-C	1	1.23914e-06	0
223	rs2513612624	Phe256Ser	19-45677082-T-C	1	6.2e-07	0.01
224	rs2513612702	Tyr259His	19-45677090-T-C	1	6.2e-07	0
225	rs2513612712	Tyr259Cys	19-45677091-A-G	1	6.2e-07	0
226	rs2513614312	Leu269Pro	19-45677335-T-C	1	1.25311e-06	0
227	rs2513614330	Phe270Cys	19-45677338-T-G	1	6.25e-07	0
228	rs2513614458	Arg278Gly	19-45677361-A-G	1	6.44e-07	0.01
229	rs2513614598	Glu282Asp	19-45677375-G-C	0.999	6.42e-07	0
230	rs2513616302	Cys286Trp	19-45677713-C-G	1	3.72224e-06	0
231	rs2513616506	Ile298Thr	19-45677748-T-C	1	2.47903e-06	0.01
232	rs2513617602	Ile317Thr	19-45677931-T-C	1	6.2e-07	0.01
233	rs2513617602	Ile317Ser	19-45677931-T-G	1	6.2e-07	0
234	rs2513617619	Leu318Phe	19-45677933-C-T	0.998	6.2e-07	0.03
235	rs2513617711	Leu322Arg	19-45677946-T-G	0.949	6.2e-07	0
236	rs2513618548	Leu339Gln	19-45678090-T-A	1	6.2e-07	0
237	rs2513618559	Ala340Thr	19-45678092-G-A	1	1.24038e-06	0
238	rs2513618664	Thr343Arg	19-45678102-C-G	1	1.86029e-06	0
239	rs2513618935	His353Tyr	19-45678131-C-T	1	2.4806e-06	0
240	rs2513619190	Arg366Trp	19-45678170-C-T	0.964	6.24e-07	0.01
241	rs2513619296	Arg370His	19-45678183-G-A	1	6.28e-07	0.01
242	rs2513619296	Arg370Pro	19-45678183-G-C	1	6.28e-07	0.01
243	rs2513619400	Phe376Cys	19-45678201-T-G	1	6.33e-07	0.04
244	rs2513619425	Ile378Phe	19-45678206-A-T	0.976	6.35e-07	0.03
245	rs2513619432	Ile378Asn	19-45678207-T-A	0.976	6.35e-07	0
246	rs2513626072	Val390Ala	19-45681620-T-C	0.982	2.47845e-06	0.01
247	rs2513626256	Glu398Lys	19-45681643-G-A	0.931	1.23936e-06	0
248	rs2513626903	Glu402Gln	19-45681738-G-C	1	6.21e-07	0
249	rs2513627022	Trp407Arg	19-45681753-T-C	1	6.22e-07	0
250	rs2513627022	Trp407Gly	19-45681753-T-G	1	6.22e-07	0
251	rs2513627664	Gly449Trp	19-45681879-G-T	0.975	6.42e-07	0
252	rs2513627941	Glu463Asp	19-45681923-A-C	0.999	6.41e-07	0
253	rs13306403	Arg316Leu	19-45677928-G-T	1	7.43574e-05	0.03

## Sheet: 4. PROVEAN ≤-2.5 (234)
PROVEAN ≤-2.5 (234)
Variants surviving this step (cumulative scores for all filters applied through this point).
No.	dbSNP rsID	Amino acid change	Variant (GRCh38)	PolyPhen-2	gnomAD AF	SIFT	PROVEAN
1	rs143490173	Asp66Gly	19-45671309-A-G	1	6.38823e-05	0	-6.5
2	rs201980985	Cys286Arg	19-45677711-T-C	1	3.10211e-06	0	-11.6
3	rs373040041	Leu304Pro	19-45677766-T-C	1	6.2e-07	0.01	-6.24
4	rs373040041	Leu304Arg	19-45677766-T-G	1	0.00013577	0.01	-5.28
5	rs764416244	Met140Thr	19-45674108-T-C	0.928	2.47905e-05	0.02	-4.08
6	rs766119961	Arg404Ser	19-45681744-C-A	1	4.34903e-06	0.03	-2.67
7	rs777065585	Arg300Trp	19-45677753-C-T	1	5.27091e-05	0	-7.73
8	rs777826805	Arg370Ser	19-45678182-C-A	1	6.89757e-06	0.01	-5.65
9	rs13306403	Arg316Leu	19-45677928-G-T	1	7.43574e-05	0.03	-5.94
10	rs74751167	Arg341His	19-45678096-G-A	1	6.2e-07	0.02	-3.6
11	rs74751167	Arg341Pro	19-45678096-G-C	1	4.65198e-05	0.01	-4.31
12	rs74751167	Arg341Leu	19-45678096-G-T	0.996	4.34185e-06	0.02	-4.92
13	rs76439420	Glu252Asp	19-45677071-G-C	1	0.00137047	0	-2.54
14	rs115338345	Arg101His	19-45672872-G-A	1	0.000686518	0.01	-3.6
15	rs115338345	Arg101Pro	19-45672872-G-C	1	6.2e-07	0.01	-4.75
16	rs139952137	Cys46Arg	19-45670698-T-C	1	3.10985e-06	0.03	-10.89
17	rs142528936	Val99Phe	19-45672865-G-T	1	3.47738e-05	0.02	-4.53
18	rs199583937	Arg183Gln	19-45674741-G-A	1	0.000161718	0.03	-3.33
19	rs199583937	Arg183Pro	19-45674741-G-C	1	3.71793e-06	0.01	-6.04
20	rs199584358	Tyr231Cys	19-45677007-A-G	1	1.85877e-06	0.01	-6.69
21	rs199584358	Tyr231Phe	19-45677007-A-T	0.999	6.2e-07	0.02	-3.19
22	rs199645877	Pro348Thr	19-45678116-C-A	1	1.24019e-06	0.03	-7.73
23	rs199645877	Pro348Ser	19-45678116-C-T	1	6.2e-07	0.04	-7.73
24	rs200089159	Gly351Cys	19-45678125-G-T	1	3.72069e-06	0	-8.7
25	rs200485112	Arg217His	19-45676965-G-A	1	6.2e-07	0.01	-4.5
26	rs200485112	Arg217Leu	19-45676965-G-T	0.987	0.000236684	0.01	-6.02
27	rs200562041	Leu262His	19-45677100-T-A	0.999	9.72983e-05	0	-5.41
28	rs200602516	Glu282Lys	19-45677373-G-A	1	6.91789e-06	0	-3.93
29	rs201212950	Asp191Glu	19-45674766-C-A	0.998	6.2e-07	0	-3.82
30	rs367687469	Arg101Cys	19-45672871-C-T	1	7.44418e-05	0	-6.05
31	rs373900520	Arg164Trp	19-45674683-C-T	1	0.000115251	0.01	-5.45
32	rs375231803	Glu237Ala	19-45677025-A-C	0.989	1.8588e-06	0	-5.75
33	rs529800464	Ser389Arg	19-45681618-C-A	1	6.2e-07	0.01	-2.88
34	rs529800464	Ser389Arg	19-45681618-C-G	1	2.35475e-05	0.01	-2.88
35	rs546589322	Leu344Gln	19-45678105-T-A	1	6.2e-07	0	-5.8
36	rs546589322	Leu344Pro	19-45678105-T-C	1	8.68133e-06	0	-6.77
37	rs546589322	Leu344Arg	19-45678105-T-G	1	2.48038e-06	0	-5.8
38	rs552883021	Ala80Asp	19-45671351-C-A	0.997	6.2e-07	0.02	-3.87
39	rs557495616	Gly97Val	19-45672860-G-T	1	6.83747e-06	0.04	-7.06
40	rs577332018	Trp287Cys	19-45677716-G-C	1	2.10864e-05	0	-12.57
41	rs745643138	Trp233Arg	19-45677012-T-A	1	6.2e-07	0	-13.45
42	rs745643138	Trp233Arg	19-45677012-T-C	1	4.95675e-06	0	-13.45
43	rs746029961	Ser64Pro	19-45671302-T-C	0.97	3.72341e-06	0.04	-2.62
44	rs746611074	Tyr240Cys	19-45677034-A-G	1	6.2e-07	0	-8.79
45	rs746846121	Gly265Arg	19-45677108-G-A	1	8.05873e-06	0.01	-7.57
46	rs746846121	Gly265Arg	19-45677108-G-C	1	6.2e-07	0.01	-7.57
47	rs746846121	Gly265Trp	19-45677108-G-T	1	6.2e-07	0	-7.53
48	rs746894609	Gly144Ser	19-45674119-G-A	1	1.67324e-05	0	-5.73
49	rs747456820	Ile187Phe	19-45674752-A-T	0.999	6.2e-07	0.04	-3.76
50	rs747689249	Arg405Ser	19-45681747-C-A	0.945	1.67763e-05	0.02	-3.11
51	rs747689249	Arg405Cys	19-45681747-C-T	1	6.21e-07	0	-5.36
52	rs748048663	Ala340Gly	19-45678093-C-G	1	6.2e-07	0	-3.87
53	rs748321836	Pro302Ala	19-45677759-C-G	1	6.2e-07	0	-6.83
54	rs748321836	Pro302Ser	19-45677759-C-T	1	3.09926e-06	0	-6.7
55	rs749416566	Leu325Val	19-45677954-C-G	0.992	6.2e-07	0.02	-2.75
56	rs750599207	Glu363Gln	19-45678161-G-C	0.997	1.24425e-06	0.04	-2.8
57	rs750730071	Gln224Pro	19-45676986-A-C	1	6.81501e-06	0.02	-5.21
58	rs754919812	Gly144Ala	19-45674120-G-C	1	8.67533e-06	0	-5.73
59	rs754919812	Gly144Val	19-45674120-G-T	1	6.2e-07	0	-8.6
60	rs754923594	Val277Phe	19-45677358-G-T	1	1.87277e-06	0.01	-4.18
61	rs755119848	Cys118Arg	19-45672922-T-C	1	8.68675e-06	0	-10.58
62	rs755265643	Ala229Val	19-45677001-C-T	1	1.23918e-06	0.04	-3.75
63	rs757704281	Glu362Lys	19-45678158-G-A	0.998	7.45864e-06	0.03	-3.14
64	rs757774381	Trp90Ser	19-45671381-G-C	1	6.23e-07	0.01	-12.85
65	rs761358733	Trp109Arg	19-45672895-T-C	1	1.23952e-06	0	-10.84
66	rs763016615	Asp191His	19-45674764-G-C	1	6.2e-07	0	-6.69
67	rs763800857	Trp287Arg	19-45677714-T-C	1	1.24046e-06	0	-13.53
68	rs764159693	Val399Met	19-45681729-G-A	1	3.47562e-05	0	-2.82
69	rs764159693	Val399Leu	19-45681729-G-C	0.995	1.2412e-06	0	-2.82
70	rs765523505	Glu362Ala	19-45678159-A-C	0.998	6.22e-07	0.03	-4.49
71	rs766200229	Gly263Asp	19-45677103-G-A	1	8.3683e-05	0	-6.65
72	rs766200229	Gly263Ala	19-45677103-G-C	0.993	6.2e-07	0	-5.58
73	rs766298263	Val271Phe	19-45677340-G-T	1	1.8755e-06	0	-4.2
74	rs767107879	Arg81Cys	19-45671353-C-T	0.99	1.24052e-06	0.04	-3.51
75	rs767963853	Arg41Trp	19-45670683-C-T	0.996	0.00010167	0.04	-3.73
76	rs768328822	Leu241Val	19-45677036-C-G	0.979	4.95686e-06	0	-2.8
77	rs769881973	Arg341Ser	19-45678095-C-A	0.992	1.86071e-06	0.02	-3.34
78	rs769881973	Arg341Cys	19-45678095-C-T	1	6.8221e-06	0	-5.89
79	rs771213011	Arg326Thr	19-45677958-G-C	0.999	2.4783e-06	0.01	-4.91
80	rs772204041	Ser64Tyr	19-45671303-C-A	0.99	6.2e-07	0.01	-3.45
81	rs773245641	Pro302Arg	19-45677760-C-G	1	6.2e-07	0	-7.86
82	rs773245641	Pro302Leu	19-45677760-C-T	1	4.33869e-06	0	-8.59
83	rs773690389	Phe394Leu	19-45681633-C-G	0.957	1.23922e-06	0	-5.23
84	rs773981009	Cys216Tyr	19-45676962-G-A	0.999	6.2e-07	0	-10.02
85	rs774121477	Thr343Ser	19-45678101-A-T	0.994	6.2e-07	0	-3.87
86	rs775273533	Tyr240His	19-45677033-T-C	0.945	2.4795e-06	0	-4.81
87	rs775596829	Asp66Asn	19-45671308-G-A	1	4.96134e-06	0	-4.45
88	rs778330895	Pro85Leu	19-45671366-C-T	1	1.24191e-05	0	-9.33
89	rs778589587	Ser381Arg	19-45678217-C-A	0.998	1.27681e-06	0.02	-3.59
90	rs779746611	Gly385Asp	19-45681605-G-A	1	6.2e-07	0	-6.77
91	rs779746611	Gly385Ala	19-45681605-G-C	1	6.2e-07	0	-5.7
92	rs779746611	Gly385Val	19-45681605-G-T	1	6.2e-07	0	-8.47
93	rs779781285	Trp264Cys	19-45677107-G-C	1	7.43903e-06	0	-12.17
94	rs780295269	Leu339Val	19-45678089-C-G	0.953	6.2e-07	0	-2.9
95	rs781376749	Asn230Asp	19-45677003-A-G	0.972	6.81521e-06	0	-4.74
96	rs781700423	Leu318Arg	19-45677934-T-G	0.999	8.05455e-06	0	-5.23
97	rs893921559	Tyr87Asp	19-45671371-T-G	0.99	6.21461e-06	0	-9.26
98	rs909594604	Arg338Lys	19-45677994-G-A	1	1.2394e-06	0	-2.9
99	rs909594604	Arg338Met	19-45677994-G-T	1	7.43693e-06	0	-5.77
100	rs929741717	Asn283Tyr	19-45677376-A-T	1	6.27e-07	0.01	-7.3
101	rs946153684	Leu152Val	19-45674143-C-G	0.996	9.29809e-06	0	-2.77
102	rs949164129	Thr168Pro	19-45674695-A-C	1	1.23928e-06	0	-4.3
103	rs951907131	Tyr225Asn	19-45676988-T-A	1	6.2e-07	0	-8.67
104	rs951907131	Tyr225His	19-45676988-T-C	1	1.23917e-06	0	-4.83
105	rs951907131	Tyr225Asp	19-45676988-T-G	1	6.2e-07	0	-9.58
106	rs1162934288	Thr142Ala	19-45674113-A-G	0.994	6.2e-07	0	-4.61
107	rs1162934288	Thr142Ser	19-45674113-A-T	0.968	6.2e-07	0	-3.59
108	rs1192921151	Gly58Cys	19-45670734-G-T	0.998	1.88432e-06	0.01	-6.78
109	rs1194857545	Glu282Gly	19-45677374-A-G	1	1.2626e-06	0	-6.88
110	rs1207653012	Glu398Asp	19-45681645-G-C	0.964	1.23928e-06	0	-2.86
111	rs1208334112	Gly263Arg	19-45677102-G-C	1	9.91631e-06	0	-7.62
112	rs1213046506	Trp90Arg	19-45671380-T-C	1	6.24e-07	0	-12.92
113	rs1213828181	Phe311Leu	19-45677914-C-A	0.98	1.85882e-06	0	-4.57
114	rs1241110746	Pro267Ser	19-45677328-C-T	1	6.29e-07	0	-7.87
115	rs1242475885	Leu325Pro	19-45677955-T-C	1	6.2e-07	0	-6.55
116	rs1242475885	Leu325Arg	19-45677955-T-G	0.995	6.2e-07	0	-5.55
117	rs1250456462	Glu377Lys	19-45678203-G-A	0.978	5.07105e-06	0.03	-2.86
118	rs1268894911	Val399Ala	19-45681730-T-C	1	6.21e-07	0	-3.75
119	rs1269105159	Ser342Tyr	19-45678099-C-A	0.999	3.1009e-06	0	-5.5
120	rs1271429083	Leu165Gln	19-45674687-T-A	1	6.2e-07	0	-5.64
121	rs1272063997	Val277Asp	19-45677359-T-A	1	2.06017e-05	0.01	-5.9
122	rs1281057139	Leu321Phe	19-45677942-C-T	1	6.2e-07	0.02	-3.53
123	rs1281459393	Cys61Trp	19-45671295-T-G	1	1.24189e-06	0	-10.52
124	rs1293207420	Leu312Pro	19-45677916-T-C	0.989	6.2e-07	0.02	-5.22
125	rs1298512253	Ser146Phe	19-45674126-C-T	1	6.2e-07	0	-5.22
126	rs1301966065	Val236Met	19-45677021-G-A	0.999	3.7175e-06	0	-2.8
127	rs1302808260	Pro348His	19-45678117-C-A	1	6.2e-07	0.01	-8.7
128	rs1302860359	Cys393Trp	19-45681630-C-G	1	6.2e-07	0.02	-9.99
129	rs1310737721	Cys70Trp	19-45671322-C-G	1	6.2e-07	0	-10.48
130	rs1319561036	Leu50Ser	19-45670711-T-C	1	1.24996e-06	0.01	-3.44
131	rs1341422602	Phe65Ser	19-45671306-T-C	1	6.2e-07	0	-7.65
132	rs1342003668	Leu147Pro	19-45674129-T-C	1	2.47874e-06	0.02	-5.81
133	rs1348050540	Leu244Phe	19-45677045-C-T	1	6.2e-07	0	-3.87
134	rs1351994626	Gly238Ser	19-45677027-G-A	1	6.2e-07	0	-5.18
135	rs1364507294	Tyr392His	19-45681625-T-C	1	1.23922e-06	0	-4.78
136	rs1368040383	Thr142Ile	19-45674114-C-T	1	7.43605e-06	0	-5.64
137	rs1369803107	Asp114Ala	19-45672911-A-C	0.986	6.2e-07	0.04	-5.4
138	rs1382604138	Arg316Gly	19-45677927-C-G	1	6.2e-07	0.03	-5.82
139	rs1382604138	Arg316Cys	19-45677927-C-T	1	6.2e-07	0	-6.79
140	rs1389933999	Phe394Tyr	19-45681632-T-A	0.997	6.2e-07	0	-2.61
141	rs1405223050	Ile299Lys	19-45677751-T-A	1	6.2e-07	0	-6.08
142	rs1405223050	Ile299Thr	19-45677751-T-C	1	4.33807e-06	0.01	-4.35
143	rs1407447389	Ser382Thr	19-45678218-T-A	0.989	7.03061e-06	0	-2.9
144	rs1426918514	Pro273His	19-45677347-C-A	1	6.24e-07	0.02	-8.79
145	rs1431587256	Asn290Lys	19-45677725-C-A	1	6.2e-07	0	-5.8
146	rs1447106220	Lys373Asn	19-45678193-G-T	0.921	1.89388e-06	0.02	-4.07
147	rs1457848658	Ser382Tyr	19-45678219-C-A	1	5.11296e-06	0	-5.83
148	rs1457848658	Ser382Cys	19-45678219-C-G	1	1.91736e-06	0	-4.9
149	rs1470786853	Thr168Ser	19-45674696-C-G	1	6.2e-07	0	-2.68
150	rs1472096312	Arg405His	19-45681748-G-A	0.996	1.24277e-06	0.02	-3.33
151	rs1475472835	Pro267Leu	19-45677329-C-T	1	6.29e-07	0	-9.83
152	rs1490061680	Val352Ala	19-45678129-T-C	0.998	6.2e-07	0.04	-3.6
153	rs1490770455	Gly265Glu	19-45677323-G-A	1	6.32e-07	0.01	-7.57
154	rs1600285930	Gly33Trp	19-45670659-G-T	0.994	3.09895e-06	0.01	-2.85
155	rs1600285997	Trp39Arg	19-45670677-T-C	1	6.2e-07	0	-11.47
156	rs1600285997	Trp39Gly	19-45670677-T-G	0.999	6.2e-07	0	-10.79
157	rs1966973819	His242Asn	19-45677039-C-A	1	1.23924e-06	0.03	-5.94
158	rs1967002101	Asn283Ser	19-45677377-A-G	0.984	6.31e-07	0.03	-4.33
159	rs1967026576	Trp296Cys	19-45677743-G-T	1	6.2e-07	0	-12.57
160	rs1967045317	Arg336Trp	19-45677987-C-T	1	6.2e-07	0.01	-5.65
161	rs1967232588	Phe394Leu	19-45681631-T-C	0.957	6.2e-07	0	-5.23
162	rs1967247063	Ile403Ser	19-45681742-T-G	0.964	6.21e-07	0.01	-4.12
163	rs1975615524	Gly107Ser	19-45672889-G-A	0.999	6.2e-07	0	-5.68
164	rs1975706542	Ala155Ser	19-45674152-G-T	0.997	6.2e-07	0	-2.87
165	rs1975737950	Arg169Ile	19-45674699-G-T	1	3.71747e-06	0	-7.65
166	rs1975739705	Ser179Phe	19-45674729-C-T	1	6.2e-07	0	-5.74
167	rs2146095934	Ile303Thr	19-45677763-T-C	1	1.23971e-06	0.01	-4.33
168	rs2513583496	Gly58Val	19-45671285-G-T	0.973	6.24e-07	0.03	-6.3
169	rs2513583656	Phe65Leu	19-45671307-C-G	0.999	1.2405e-06	0.02	-5.74
170	rs2513583714	Tyr68His	19-45671314-T-C	1	6.2e-07	0.01	-4.71
171	rs2513583724	Tyr68Cys	19-45671315-A-G	1	6.2e-07	0.01	-8.31
172	rs2513583779	Cys70Tyr	19-45671321-G-A	1	6.2e-07	0	-10.5
173	rs2513583779	Cys70Phe	19-45671321-G-T	0.999	1.24e-06	0	-10.5
174	rs2513583861	Asn77His	19-45671341-A-C	0.991	1.24006e-06	0.04	-3.99
175	rs2513584073	Cys84Tyr	19-45671363-G-A	0.999	1.24138e-06	0	-10.52
176	rs2513584175	Leu88Arg	19-45671375-T-G	0.995	6.23e-07	0	-5.74
177	rs2513598054	Val139Gly	19-45674105-T-G	0.999	6.2e-07	0	-4.99
178	rs2513598133	Tyr141Asn	19-45674110-T-A	1	6.2e-07	0	-8.6
179	rs2513598440	Leu152Arg	19-45674144-T-G	0.999	6.2e-07	0	-5.5
180	rs2513598467	Leu153Pro	19-45674147-T-C	1	6.2e-07	0.01	-5.03
181	rs2513598491	Ala155Asp	19-45674153-C-A	1	1.24033e-06	0	-5.74
182	rs2513598582	Ile158Thr	19-45674162-T-C	1	6.2e-07	0.01	-4.37
183	rs2513598606	Ile158Met	19-45674163-C-G	0.999	6.21e-07	0.02	-2.52
184	rs2513602043	Leu165Val	19-45674686-C-G	1	1.85874e-06	0	-2.67
185	rs2513602093	His166Tyr	19-45674689-C-T	0.912	6.2e-07	0	-4.62
186	rs2513602133	Cys167Tyr	19-45674693-G-A	1	6.2e-07	0	-10.52
187	rs2513602163	Arg169Gly	19-45674698-A-G	1	6.2e-07	0	-6.69
188	rs2513602187	Asn170Ser	19-45674702-A-G	0.99	6.2e-07	0	-4.78
189	rs2513602263	Ile172Asn	19-45674708-T-A	1	1.23915e-06	0	-6.69
190	rs2513602339	Phe177Leu	19-45674722-T-C	1	6.2e-07	0	-5.74
191	rs2513602362	Phe177Ser	19-45674723-T-C	1	4.33705e-06	0	-7.65
192	rs2513602370	Phe177Leu	19-45674724-C-G	1	6.2e-07	0	-5.74
193	rs2513602415	Phe180Ser	19-45674732-T-C	1	6.2e-07	0	-6.98
194	rs2513602681	Asp191Val	19-45674765-A-T	1	6.2e-07	0	-8.47
195	rs2513602781	Leu194Pro	19-45674774-T-C	1	6.2e-07	0.01	-5.59
196	rs2513611729	Cys216Ser	19-45676961-T-A	0.999	6.2e-07	0	-9.12
197	rs2513611729	Cys216Gly	19-45676961-T-G	0.999	6.2e-07	0	-10.68
198	rs2513611950	Val227Glu	19-45676995-T-A	0.999	1.23913e-06	0	-5.59
199	rs2513611950	Val227Ala	19-45676995-T-C	0.977	6.2e-07	0.01	-3.76
200	rs2513612038	Asn230Lys	19-45677005-C-A	0.938	6.2e-07	0	-5.65
201	rs2513612124	Leu234Pro	19-45677016-T-C	1	3.71731e-06	0	-6.43
202	rs2513612176	Gly238Ala	19-45677028-G-C	1	6.2e-07	0	-4.88
203	rs2513612176	Gly238Val	19-45677028-G-T	1	1.23966e-06	0	-7.88
204	rs2513612269	Leu241Arg	19-45677037-T-G	0.997	6.2e-07	0	-5.62
205	rs2513612505	Glu252Gln	19-45677069-G-C	1	1.23914e-06	0	-2.5
206	rs2513612624	Phe256Ser	19-45677082-T-C	1	6.2e-07	0.01	-6.64
207	rs2513612702	Tyr259His	19-45677090-T-C	1	6.2e-07	0	-4.72
208	rs2513612712	Tyr259Cys	19-45677091-A-G	1	6.2e-07	0	-8.33
209	rs2513614312	Leu269Pro	19-45677335-T-C	1	1.25311e-06	0	-6.38
210	rs2513614330	Phe270Cys	19-45677338-T-G	1	6.25e-07	0	-7.72
211	rs2513614458	Arg278Gly	19-45677361-A-G	1	6.44e-07	0.01	-5.27
212	rs2513614598	Glu282Asp	19-45677375-G-C	0.999	6.42e-07	0	-2.95
213	rs2513616302	Cys286Trp	19-45677713-C-G	1	3.72224e-06	0	-10.63
214	rs2513616506	Ile298Thr	19-45677748-T-C	1	2.47903e-06	0.01	-4.83
215	rs2513617602	Ile317Thr	19-45677931-T-C	1	6.2e-07	0.01	-4.46
216	rs2513617602	Ile317Ser	19-45677931-T-G	1	6.2e-07	0	-5.57
217	rs2513617619	Leu318Phe	19-45677933-C-T	0.998	6.2e-07	0.03	-2.78
218	rs2513617711	Leu322Arg	19-45677946-T-G	0.949	6.2e-07	0	-4.4
219	rs2513618548	Leu339Gln	19-45678090-T-A	1	6.2e-07	0	-5.68
220	rs2513618559	Ala340Thr	19-45678092-G-A	1	1.24038e-06	0	-3.87
221	rs2513618664	Thr343Arg	19-45678102-C-G	1	1.86029e-06	0	-5.8
222	rs2513618935	His353Tyr	19-45678131-C-T	1	2.4806e-06	0	-5.8
223	rs2513619190	Arg366Trp	19-45678170-C-T	0.964	6.24e-07	0.01	-3.86
224	rs2513619296	Arg370His	19-45678183-G-A	1	6.28e-07	0.01	-4.79
225	rs2513619296	Arg370Pro	19-45678183-G-C	1	6.28e-07	0.01	-6.54
226	rs2513619400	Phe376Cys	19-45678201-T-G	1	6.33e-07	0.04	-5.07
227	rs2513619432	Ile378Asn	19-45678207-T-A	0.976	6.35e-07	0	-5.37
228	rs2513626072	Val390Ala	19-45681620-T-C	0.982	2.47845e-06	0.01	-3.8
229	rs2513626256	Glu398Lys	19-45681643-G-A	0.931	1.23936e-06	0	-3.76
230	rs2513626903	Glu402Gln	19-45681738-G-C	1	6.21e-07	0	-2.68
231	rs2513627022	Trp407Arg	19-45681753-T-C	1	6.22e-07	0	-11.45
232	rs2513627022	Trp407Gly	19-45681753-T-G	1	6.22e-07	0	-10.72
233	rs2513627664	Gly449Trp	19-45681879-G-T	0.975	6.42e-07	0	-2.67
234	rs13306403	Arg316Leu	19-45677928-G-T	1	7.43574e-05	0.03	-5.94

## Sheet: 5. AlphaMissense ≥0.564 (145)
AlphaMissense ≥0.564 (145)
Variants surviving this step (cumulative scores for all filters applied through this point).
No.	dbSNP rsID	Amino acid change	Variant (GRCh38)	PolyPhen-2	gnomAD AF	SIFT	PROVEAN	AlphaMissense
1	rs143490173	Asp66Gly	19-45671309-A-G	1	6.38823e-05	0	-6.5	0.8878
2	rs201980985	Cys286Arg	19-45677711-T-C	1	3.10211e-06	0	-11.6	0.9711
3	rs373040041	Leu304Pro	19-45677766-T-C	1	6.2e-07	0.01	-6.24	0.8504
4	rs777826805	Arg370Ser	19-45678182-C-A	1	6.89757e-06	0.01	-5.65	0.6722
5	rs74751167	Arg341Pro	19-45678096-G-C	1	4.65198e-05	0.01	-4.31	0.8554
6	rs115338345	Arg101Pro	19-45672872-G-C	1	6.2e-07	0.01	-4.75	0.9753
7	rs139952137	Cys46Arg	19-45670698-T-C	1	3.10985e-06	0.03	-10.89	0.9569
8	rs142528936	Val99Phe	19-45672865-G-T	1	3.47738e-05	0.02	-4.53	0.7079
9	rs199583937	Arg183Pro	19-45674741-G-C	1	3.71793e-06	0.01	-6.04	0.9461
10	rs199645877	Pro348Thr	19-45678116-C-A	1	1.24019e-06	0.03	-7.73	0.6195
11	rs199645877	Pro348Ser	19-45678116-C-T	1	6.2e-07	0.04	-7.73	0.6853
12	rs200089159	Gly351Cys	19-45678125-G-T	1	3.72069e-06	0	-8.7	0.8788
13	rs200562041	Leu262His	19-45677100-T-A	0.999	9.72983e-05	0	-5.41	0.6189
14	rs200602516	Glu282Lys	19-45677373-G-A	1	6.91789e-06	0	-3.93	0.7035
15	rs201212950	Asp191Glu	19-45674766-C-A	0.998	6.2e-07	0	-3.82	0.8004
16	rs367687469	Arg101Cys	19-45672871-C-T	1	7.44418e-05	0	-6.05	0.6523
17	rs375231803	Glu237Ala	19-45677025-A-C	0.989	1.8588e-06	0	-5.75	0.9522
18	rs529800464	Ser389Arg	19-45681618-C-A	1	6.2e-07	0.01	-2.88	0.9962
19	rs529800464	Ser389Arg	19-45681618-C-G	1	2.35475e-05	0.01	-2.88	0.9962
20	rs546589322	Leu344Gln	19-45678105-T-A	1	6.2e-07	0	-5.8	0.8943
21	rs546589322	Leu344Pro	19-45678105-T-C	1	8.68133e-06	0	-6.77	0.9506
22	rs546589322	Leu344Arg	19-45678105-T-G	1	2.48038e-06	0	-5.8	0.8896
23	rs557495616	Gly97Val	19-45672860-G-T	1	6.83747e-06	0.04	-7.06	0.8008
24	rs577332018	Trp287Cys	19-45677716-G-C	1	2.10864e-05	0	-12.57	0.9927
25	rs745643138	Trp233Arg	19-45677012-T-A	1	6.2e-07	0	-13.45	0.9924
26	rs745643138	Trp233Arg	19-45677012-T-C	1	4.95675e-06	0	-13.45	0.9924
27	rs746029961	Ser64Pro	19-45671302-T-C	0.97	3.72341e-06	0.04	-2.62	0.9034
28	rs746846121	Gly265Arg	19-45677108-G-A	1	8.05873e-06	0.01	-7.57	0.9555
29	rs746846121	Gly265Arg	19-45677108-G-C	1	6.2e-07	0.01	-7.57	0.9555
30	rs746846121	Gly265Trp	19-45677108-G-T	1	6.2e-07	0	-7.53	0.8036
31	rs746894609	Gly144Ser	19-45674119-G-A	1	1.67324e-05	0	-5.73	0.7812
32	rs747456820	Ile187Phe	19-45674752-A-T	0.999	6.2e-07	0.04	-3.76	0.5696
33	rs748321836	Pro302Ala	19-45677759-C-G	1	6.2e-07	0	-6.83	0.7068
34	rs748321836	Pro302Ser	19-45677759-C-T	1	3.09926e-06	0	-6.7	0.8515
35	rs750730071	Gln224Pro	19-45676986-A-C	1	6.81501e-06	0.02	-5.21	0.7505
36	rs754919812	Gly144Ala	19-45674120-G-C	1	8.67533e-06	0	-5.73	0.7807
37	rs754919812	Gly144Val	19-45674120-G-T	1	6.2e-07	0	-8.6	0.9508
38	rs755119848	Cys118Arg	19-45672922-T-C	1	8.68675e-06	0	-10.58	0.985
39	rs757774381	Trp90Ser	19-45671381-G-C	1	6.23e-07	0.01	-12.85	0.6417
40	rs761358733	Trp109Arg	19-45672895-T-C	1	1.23952e-06	0	-10.84	0.9858
41	rs763016615	Asp191His	19-45674764-G-C	1	6.2e-07	0	-6.69	0.8914
42	rs763800857	Trp287Arg	19-45677714-T-C	1	1.24046e-06	0	-13.53	0.978
43	rs764159693	Val399Met	19-45681729-G-A	1	3.47562e-05	0	-2.82	0.8863
44	rs764159693	Val399Leu	19-45681729-G-C	0.995	1.2412e-06	0	-2.82	0.9148
45	rs766200229	Gly263Asp	19-45677103-G-A	1	8.3683e-05	0	-6.65	0.9823
46	rs766200229	Gly263Ala	19-45677103-G-C	0.993	6.2e-07	0	-5.58	0.6728
47	rs766298263	Val271Phe	19-45677340-G-T	1	1.8755e-06	0	-4.2	0.5973
48	rs768328822	Leu241Val	19-45677036-C-G	0.979	4.95686e-06	0	-2.8	0.6533
49	rs769881973	Arg341Ser	19-45678095-C-A	0.992	1.86071e-06	0.02	-3.34	0.8104
50	rs773245641	Pro302Arg	19-45677760-C-G	1	6.2e-07	0	-7.86	0.9716
51	rs773245641	Pro302Leu	19-45677760-C-T	1	4.33869e-06	0	-8.59	0.8623
52	rs773690389	Phe394Leu	19-45681633-C-G	0.957	1.23922e-06	0	-5.23	0.9356
53	rs773981009	Cys216Tyr	19-45676962-G-A	0.999	6.2e-07	0	-10.02	0.9296
54	rs775596829	Asp66Asn	19-45671308-G-A	1	4.96134e-06	0	-4.45	0.8599
55	rs778330895	Pro85Leu	19-45671366-C-T	1	1.24191e-05	0	-9.33	0.896
56	rs778589587	Ser381Arg	19-45678217-C-A	0.998	1.27681e-06	0.02	-3.59	0.9273
57	rs779746611	Gly385Asp	19-45681605-G-A	1	6.2e-07	0	-6.77	0.9708
58	rs779746611	Gly385Ala	19-45681605-G-C	1	6.2e-07	0	-5.7	0.891
59	rs779746611	Gly385Val	19-45681605-G-T	1	6.2e-07	0	-8.47	0.9059
60	rs779781285	Trp264Cys	19-45677107-G-C	1	7.43903e-06	0	-12.17	0.9746
61	rs781376749	Asn230Asp	19-45677003-A-G	0.972	6.81521e-06	0	-4.74	0.7422
62	rs781700423	Leu318Arg	19-45677934-T-G	0.999	8.05455e-06	0	-5.23	0.5881
63	rs893921559	Tyr87Asp	19-45671371-T-G	0.99	6.21461e-06	0	-9.26	0.9657
64	rs909594604	Arg338Met	19-45677994-G-T	1	7.43693e-06	0	-5.77	0.7843
65	rs929741717	Asn283Tyr	19-45677376-A-T	1	6.27e-07	0.01	-7.3	0.6915
66	rs951907131	Tyr225Asn	19-45676988-T-A	1	6.2e-07	0	-8.67	0.9271
67	rs951907131	Tyr225His	19-45676988-T-C	1	1.23917e-06	0	-4.83	0.9564
68	rs951907131	Tyr225Asp	19-45676988-T-G	1	6.2e-07	0	-9.58	0.9811
69	rs1194857545	Glu282Gly	19-45677374-A-G	1	1.2626e-06	0	-6.88	0.6399
70	rs1207653012	Glu398Asp	19-45681645-G-C	0.964	1.23928e-06	0	-2.86	0.7473
71	rs1208334112	Gly263Arg	19-45677102-G-C	1	9.91631e-06	0	-7.62	0.9743
72	rs1213046506	Trp90Arg	19-45671380-T-C	1	6.24e-07	0	-12.92	0.943
73	rs1213828181	Phe311Leu	19-45677914-C-A	0.98	1.85882e-06	0	-4.57	0.7858
74	rs1241110746	Pro267Ser	19-45677328-C-T	1	6.29e-07	0	-7.87	0.6642
75	rs1242475885	Leu325Pro	19-45677955-T-C	1	6.2e-07	0	-6.55	0.6353
76	rs1250456462	Glu377Lys	19-45678203-G-A	0.978	5.07105e-06	0.03	-2.86	0.7687
77	rs1268894911	Val399Ala	19-45681730-T-C	1	6.21e-07	0	-3.75	0.8496
78	rs1269105159	Ser342Tyr	19-45678099-C-A	0.999	3.1009e-06	0	-5.5	0.7389
79	rs1271429083	Leu165Gln	19-45674687-T-A	1	6.2e-07	0	-5.64	0.7171
80	rs1272063997	Val277Asp	19-45677359-T-A	1	2.06017e-05	0.01	-5.9	0.8013
81	rs1281459393	Cys61Trp	19-45671295-T-G	1	1.24189e-06	0	-10.52	0.9821
82	rs1302808260	Pro348His	19-45678117-C-A	1	6.2e-07	0.01	-8.7	0.9343
83	rs1302860359	Cys393Trp	19-45681630-C-G	1	6.2e-07	0.02	-9.99	0.9611
84	rs1310737721	Cys70Trp	19-45671322-C-G	1	6.2e-07	0	-10.48	0.976
85	rs1341422602	Phe65Ser	19-45671306-T-C	1	6.2e-07	0	-7.65	0.9304
86	rs1342003668	Leu147Pro	19-45674129-T-C	1	2.47874e-06	0.02	-5.81	0.7705
87	rs1364507294	Tyr392His	19-45681625-T-C	1	1.23922e-06	0	-4.78	0.916
88	rs1368040383	Thr142Ile	19-45674114-C-T	1	7.43605e-06	0	-5.64	0.6494
89	rs1405223050	Ile299Lys	19-45677751-T-A	1	6.2e-07	0	-6.08	0.9495
90	rs1405223050	Ile299Thr	19-45677751-T-C	1	4.33807e-06	0.01	-4.35	0.8758
91	rs1407447389	Ser382Thr	19-45678218-T-A	0.989	7.03061e-06	0	-2.9	0.6867
92	rs1426918514	Pro273His	19-45677347-C-A	1	6.24e-07	0.02	-8.79	0.8955
93	rs1431587256	Asn290Lys	19-45677725-C-A	1	6.2e-07	0	-5.8	0.8497
94	rs1447106220	Lys373Asn	19-45678193-G-T	0.921	1.89388e-06	0.02	-4.07	0.9382
95	rs1457848658	Ser382Tyr	19-45678219-C-A	1	5.11296e-06	0	-5.83	0.9675
96	rs1457848658	Ser382Cys	19-45678219-C-G	1	1.91736e-06	0	-4.9	0.5962
97	rs1475472835	Pro267Leu	19-45677329-C-T	1	6.29e-07	0	-9.83	0.8243
98	rs1490770455	Gly265Glu	19-45677323-G-A	1	6.32e-07	0.01	-7.57	0.9065
99	rs1600285997	Trp39Arg	19-45670677-T-C	1	6.2e-07	0	-11.47	0.9234
100	rs1600285997	Trp39Gly	19-45670677-T-G	0.999	6.2e-07	0	-10.79	0.7572
101	rs1967026576	Trp296Cys	19-45677743-G-T	1	6.2e-07	0	-12.57	0.9565
102	rs1967232588	Phe394Leu	19-45681631-T-C	0.957	6.2e-07	0	-5.23	0.9356
103	rs1967247063	Ile403Ser	19-45681742-T-G	0.964	6.21e-07	0.01	-4.12	0.6965
104	rs1975737950	Arg169Ile	19-45674699-G-T	1	3.71747e-06	0	-7.65	0.9731
105	rs1975739705	Ser179Phe	19-45674729-C-T	1	6.2e-07	0	-5.74	0.9823
106	rs2146095934	Ile303Thr	19-45677763-T-C	1	1.23971e-06	0.01	-4.33	0.8756
107	rs2513583656	Phe65Leu	19-45671307-C-G	0.999	1.2405e-06	0.02	-5.74	0.9913
108	rs2513583714	Tyr68His	19-45671314-T-C	1	6.2e-07	0.01	-4.71	0.8855
109	rs2513583724	Tyr68Cys	19-45671315-A-G	1	6.2e-07	0.01	-8.31	0.9706
110	rs2513583779	Cys70Tyr	19-45671321-G-A	1	6.2e-07	0	-10.5	0.9807
111	rs2513583779	Cys70Phe	19-45671321-G-T	0.999	1.24e-06	0	-10.5	0.9631
112	rs2513584073	Cys84Tyr	19-45671363-G-A	0.999	1.24138e-06	0	-10.52	0.9916
113	rs2513584175	Leu88Arg	19-45671375-T-G	0.995	6.23e-07	0	-5.74	0.8051
114	rs2513598133	Tyr141Asn	19-45674110-T-A	1	6.2e-07	0	-8.6	0.6358
115	rs2513598440	Leu152Arg	19-45674144-T-G	0.999	6.2e-07	0	-5.5	0.8928
116	rs2513598491	Ala155Asp	19-45674153-C-A	1	1.24033e-06	0	-5.74	0.9404
117	rs2513602133	Cys167Tyr	19-45674693-G-A	1	6.2e-07	0	-10.52	0.9138
118	rs2513602163	Arg169Gly	19-45674698-A-G	1	6.2e-07	0	-6.69	0.8579
119	rs2513602187	Asn170Ser	19-45674702-A-G	0.99	6.2e-07	0	-4.78	0.6453
120	rs2513602263	Ile172Asn	19-45674708-T-A	1	1.23915e-06	0	-6.69	0.9629
121	rs2513602339	Phe177Leu	19-45674722-T-C	1	6.2e-07	0	-5.74	0.9808
122	rs2513602362	Phe177Ser	19-45674723-T-C	1	4.33705e-06	0	-7.65	0.97
123	rs2513602370	Phe177Leu	19-45674724-C-G	1	6.2e-07	0	-5.74	0.9808
124	rs2513602415	Phe180Ser	19-45674732-T-C	1	6.2e-07	0	-6.98	0.9274
125	rs2513602681	Asp191Val	19-45674765-A-T	1	6.2e-07	0	-8.47	0.9242
126	rs2513611729	Cys216Ser	19-45676961-T-A	0.999	6.2e-07	0	-9.12	0.926
127	rs2513611729	Cys216Gly	19-45676961-T-G	0.999	6.2e-07	0	-10.68	0.79
128	rs2513611950	Val227Glu	19-45676995-T-A	0.999	1.23913e-06	0	-5.59	0.7565
129	rs2513612038	Asn230Lys	19-45677005-C-A	0.938	6.2e-07	0	-5.65	0.9728
130	rs2513612124	Leu234Pro	19-45677016-T-C	1	3.71731e-06	0	-6.43	0.9645
131	rs2513612176	Gly238Val	19-45677028-G-T	1	1.23966e-06	0	-7.88	0.8094
132	rs2513612269	Leu241Arg	19-45677037-T-G	0.997	6.2e-07	0	-5.62	0.8195
133	rs2513612624	Phe256Ser	19-45677082-T-C	1	6.2e-07	0.01	-6.64	0.5719
134	rs2513614330	Phe270Cys	19-45677338-T-G	1	6.25e-07	0	-7.72	0.637
135	rs2513614458	Arg278Gly	19-45677361-A-G	1	6.44e-07	0.01	-5.27	0.8805
136	rs2513614598	Glu282Asp	19-45677375-G-C	0.999	6.42e-07	0	-2.95	0.5713
137	rs2513616302	Cys286Trp	19-45677713-C-G	1	3.72224e-06	0	-10.63	0.9504
138	rs2513616506	Ile298Thr	19-45677748-T-C	1	2.47903e-06	0.01	-4.83	0.9234
139	rs2513617602	Ile317Thr	19-45677931-T-C	1	6.2e-07	0.01	-4.46	0.8224
140	rs2513617602	Ile317Ser	19-45677931-T-G	1	6.2e-07	0	-5.57	0.7679
141	rs2513618548	Leu339Gln	19-45678090-T-A	1	6.2e-07	0	-5.68	0.7336
142	rs2513618664	Thr343Arg	19-45678102-C-G	1	1.86029e-06	0	-5.8	0.9066
143	rs2513619296	Arg370Pro	19-45678183-G-C	1	6.28e-07	0.01	-6.54	0.5696
144	rs2513619432	Ile378Asn	19-45678207-T-A	0.976	6.35e-07	0	-5.37	0.5978
145	rs2513626256	Glu398Lys	19-45681643-G-A	0.931	1.23936e-06	0	-3.76	0.9039

## Sheet: 6. MetaRNN ≥0.5 (140)
MetaRNN ≥0.5 (140)
Variants surviving this step (cumulative scores for all filters applied through this point).
No.	dbSNP rsID	Amino acid change	Variant (GRCh38)	PolyPhen-2	gnomAD AF	SIFT	PROVEAN	AlphaMissense	MetaRNN
1	rs143490173	Asp66Gly	19-45671309-A-G	1	6.38823e-05	0	-6.5	0.8878	0.919765
2	rs201980985	Cys286Arg	19-45677711-T-C	1	3.10211e-06	0	-11.6	0.9711	0.921978
3	rs373040041	Leu304Pro	19-45677766-T-C	1	6.2e-07	0.01	-6.24	0.8504	0.953542
4	rs777826805	Arg370Ser	19-45678182-C-A	1	6.89757e-06	0.01	-5.65	0.6722	0.79394
5	rs115338345	Arg101Pro	19-45672872-G-C	1	6.2e-07	0.01	-4.75	0.9753	0.97018
6	rs142528936	Val99Phe	19-45672865-G-T	1	3.47738e-05	0.02	-4.53	0.7079	0.81992
7	rs199583937	Arg183Pro	19-45674741-G-C	1	3.71793e-06	0.01	-6.04	0.9461	0.957327
8	rs199645877	Pro348Thr	19-45678116-C-A	1	1.24019e-06	0.03	-7.73	0.6195	0.967529
9	rs199645877	Pro348Ser	19-45678116-C-T	1	6.2e-07	0.04	-7.73	0.6853	0.969958
10	rs200089159	Gly351Cys	19-45678125-G-T	1	3.72069e-06	0	-8.7	0.8788	0.894354
11	rs200602516	Glu282Lys	19-45677373-G-A	1	6.91789e-06	0	-3.93	0.7035	0.848378
12	rs201212950	Asp191Glu	19-45674766-C-A	0.998	6.2e-07	0	-3.82	0.8004	0.770833
13	rs367687469	Arg101Cys	19-45672871-C-T	1	7.44418e-05	0	-6.05	0.6523	0.91882
14	rs375231803	Glu237Ala	19-45677025-A-C	0.989	1.8588e-06	0	-5.75	0.9522	0.983809
15	rs529800464	Ser389Arg	19-45681618-C-A	1	6.2e-07	0.01	-2.88	0.9962	0.914827
16	rs529800464	Ser389Arg	19-45681618-C-G	1	2.35475e-05	0.01	-2.88	0.9962	0.914625
17	rs546589322	Leu344Gln	19-45678105-T-A	1	6.2e-07	0	-5.8	0.8943	0.967113
18	rs546589322	Leu344Pro	19-45678105-T-C	1	8.68133e-06	0	-6.77	0.9506	0.964672
19	rs546589322	Leu344Arg	19-45678105-T-G	1	2.48038e-06	0	-5.8	0.8896	0.956035
20	rs557495616	Gly97Val	19-45672860-G-T	1	6.83747e-06	0.04	-7.06	0.8008	0.895584
21	rs577332018	Trp287Cys	19-45677716-G-C	1	2.10864e-05	0	-12.57	0.9927	0.953209
22	rs745643138	Trp233Arg	19-45677012-T-A	1	6.2e-07	0	-13.45	0.9924	0.990598
23	rs745643138	Trp233Arg	19-45677012-T-C	1	4.95675e-06	0	-13.45	0.9924	0.990522
24	rs746029961	Ser64Pro	19-45671302-T-C	0.97	3.72341e-06	0.04	-2.62	0.9034	0.804587
25	rs746846121	Gly265Arg	19-45677108-G-A	1	8.05873e-06	0.01	-7.57	0.9555	0.991511
26	rs746846121	Gly265Arg	19-45677108-G-C	1	6.2e-07	0.01	-7.57	0.9555	0.992008
27	rs746846121	Gly265Trp	19-45677108-G-T	1	6.2e-07	0	-7.53	0.8036	0.988678
28	rs746894609	Gly144Ser	19-45674119-G-A	1	1.67324e-05	0	-5.73	0.7812	0.960222
29	rs747456820	Ile187Phe	19-45674752-A-T	0.999	6.2e-07	0.04	-3.76	0.5696	0.795419
30	rs748321836	Pro302Ala	19-45677759-C-G	1	6.2e-07	0	-6.83	0.7068	0.967847
31	rs748321836	Pro302Ser	19-45677759-C-T	1	3.09926e-06	0	-6.7	0.8515	0.956533
32	rs750730071	Gln224Pro	19-45676986-A-C	1	6.81501e-06	0.02	-5.21	0.7505	0.904697
33	rs754919812	Gly144Ala	19-45674120-G-C	1	8.67533e-06	0	-5.73	0.7807	0.978698
34	rs754919812	Gly144Val	19-45674120-G-T	1	6.2e-07	0	-8.6	0.9508	0.985523
35	rs755119848	Cys118Arg	19-45672922-T-C	1	8.68675e-06	0	-10.58	0.985	0.981236
36	rs757774381	Trp90Ser	19-45671381-G-C	1	6.23e-07	0.01	-12.85	0.6417	0.873028
37	rs761358733	Trp109Arg	19-45672895-T-C	1	1.23952e-06	0	-10.84	0.9858	0.972148
38	rs763016615	Asp191His	19-45674764-G-C	1	6.2e-07	0	-6.69	0.8914	0.983305
39	rs763800857	Trp287Arg	19-45677714-T-C	1	1.24046e-06	0	-13.53	0.978	0.99087
40	rs764159693	Val399Met	19-45681729-G-A	1	3.47562e-05	0	-2.82	0.8863	0.964557
41	rs764159693	Val399Leu	19-45681729-G-C	0.995	1.2412e-06	0	-2.82	0.9148	0.959254
42	rs766200229	Gly263Asp	19-45677103-G-A	1	8.3683e-05	0	-6.65	0.9823	0.961717
43	rs766200229	Gly263Ala	19-45677103-G-C	0.993	6.2e-07	0	-5.58	0.6728	0.976624
44	rs766298263	Val271Phe	19-45677340-G-T	1	1.8755e-06	0	-4.2	0.5973	0.961947
45	rs768328822	Leu241Val	19-45677036-C-G	0.979	4.95686e-06	0	-2.8	0.6533	0.903001
46	rs769881973	Arg341Ser	19-45678095-C-A	0.992	1.86071e-06	0.02	-3.34	0.8104	0.734913
47	rs773245641	Pro302Arg	19-45677760-C-G	1	6.2e-07	0	-7.86	0.9716	0.98022
48	rs773245641	Pro302Leu	19-45677760-C-T	1	4.33869e-06	0	-8.59	0.8623	0.970719
49	rs773690389	Phe394Leu	19-45681633-C-G	0.957	1.23922e-06	0	-5.23	0.9356	0.956501
50	rs773981009	Cys216Tyr	19-45676962-G-A	0.999	6.2e-07	0	-10.02	0.9296	0.988013
51	rs775596829	Asp66Asn	19-45671308-G-A	1	4.96134e-06	0	-4.45	0.8599	0.974769
52	rs778330895	Pro85Leu	19-45671366-C-T	1	1.24191e-05	0	-9.33	0.896	0.94961
53	rs778589587	Ser381Arg	19-45678217-C-A	0.998	1.27681e-06	0.02	-3.59	0.9273	0.903477
54	rs779746611	Gly385Asp	19-45681605-G-A	1	6.2e-07	0	-6.77	0.9708	0.989527
55	rs779746611	Gly385Ala	19-45681605-G-C	1	6.2e-07	0	-5.7	0.891	0.947249
56	rs779746611	Gly385Val	19-45681605-G-T	1	6.2e-07	0	-8.47	0.9059	0.990028
57	rs779781285	Trp264Cys	19-45677107-G-C	1	7.43903e-06	0	-12.17	0.9746	0.967549
58	rs781376749	Asn230Asp	19-45677003-A-G	0.972	6.81521e-06	0	-4.74	0.7422	0.94003
59	rs781700423	Leu318Arg	19-45677934-T-G	0.999	8.05455e-06	0	-5.23	0.5881	0.943313
60	rs893921559	Tyr87Asp	19-45671371-T-G	0.99	6.21461e-06	0	-9.26	0.9657	0.890031
61	rs909594604	Arg338Met	19-45677994-G-T	1	7.43693e-06	0	-5.77	0.7843	0.721955
62	rs929741717	Asn283Tyr	19-45677376-A-T	1	6.27e-07	0.01	-7.3	0.6915	0.936061
63	rs951907131	Tyr225Asn	19-45676988-T-A	1	6.2e-07	0	-8.67	0.9271	0.941125
64	rs951907131	Tyr225His	19-45676988-T-C	1	1.23917e-06	0	-4.83	0.9564	0.91813
65	rs951907131	Tyr225Asp	19-45676988-T-G	1	6.2e-07	0	-9.58	0.9811	0.940575
66	rs1194857545	Glu282Gly	19-45677374-A-G	1	1.2626e-06	0	-6.88	0.6399	0.882074
67	rs1207653012	Glu398Asp	19-45681645-G-C	0.964	1.23928e-06	0	-2.86	0.7473	0.935037
68	rs1208334112	Gly263Arg	19-45677102-G-C	1	9.91631e-06	0	-7.62	0.9743	0.989289
69	rs1213046506	Trp90Arg	19-45671380-T-C	1	6.24e-07	0	-12.92	0.943	0.925966
70	rs1241110746	Pro267Ser	19-45677328-C-T	1	6.29e-07	0	-7.87	0.6642	0.986461
71	rs1242475885	Leu325Pro	19-45677955-T-C	1	6.2e-07	0	-6.55	0.6353	0.962693
72	rs1250456462	Glu377Lys	19-45678203-G-A	0.978	5.07105e-06	0.03	-2.86	0.7687	0.763445
73	rs1268894911	Val399Ala	19-45681730-T-C	1	6.21e-07	0	-3.75	0.8496	0.939169
74	rs1269105159	Ser342Tyr	19-45678099-C-A	0.999	3.1009e-06	0	-5.5	0.7389	0.870977
75	rs1271429083	Leu165Gln	19-45674687-T-A	1	6.2e-07	0	-5.64	0.7171	0.985688
76	rs1272063997	Val277Asp	19-45677359-T-A	1	2.06017e-05	0.01	-5.9	0.8013	0.936756
77	rs1281459393	Cys61Trp	19-45671295-T-G	1	1.24189e-06	0	-10.52	0.9821	0.992819
78	rs1302808260	Pro348His	19-45678117-C-A	1	6.2e-07	0.01	-8.7	0.9343	0.969375
79	rs1302860359	Cys393Trp	19-45681630-C-G	1	6.2e-07	0.02	-9.99	0.9611	0.979328
80	rs1310737721	Cys70Trp	19-45671322-C-G	1	6.2e-07	0	-10.48	0.976	0.931502
81	rs1341422602	Phe65Ser	19-45671306-T-C	1	6.2e-07	0	-7.65	0.9304	0.944781
82	rs1342003668	Leu147Pro	19-45674129-T-C	1	2.47874e-06	0.02	-5.81	0.7705	0.97181
83	rs1364507294	Tyr392His	19-45681625-T-C	1	1.23922e-06	0	-4.78	0.916	0.936164
84	rs1368040383	Thr142Ile	19-45674114-C-T	1	7.43605e-06	0	-5.64	0.6494	0.937451
85	rs1405223050	Ile299Lys	19-45677751-T-A	1	6.2e-07	0	-6.08	0.9495	0.933102
86	rs1405223050	Ile299Thr	19-45677751-T-C	1	4.33807e-06	0.01	-4.35	0.8758	0.914728
87	rs1407447389	Ser382Thr	19-45678218-T-A	0.989	7.03061e-06	0	-2.9	0.6867	0.969057
88	rs1426918514	Pro273His	19-45677347-C-A	1	6.24e-07	0.02	-8.79	0.8955	0.886043
89	rs1431587256	Asn290Lys	19-45677725-C-A	1	6.2e-07	0	-5.8	0.8497	0.875246
90	rs1457848658	Ser382Tyr	19-45678219-C-A	1	5.11296e-06	0	-5.83	0.9675	0.976712
91	rs1457848658	Ser382Cys	19-45678219-C-G	1	1.91736e-06	0	-4.9	0.5962	0.971094
92	rs1475472835	Pro267Leu	19-45677329-C-T	1	6.29e-07	0	-9.83	0.8243	0.942974
93	rs1490770455	Gly265Glu	19-45677323-G-A	1	6.32e-07	0.01	-7.57	0.9065	0.988675
94	rs1600285997	Trp39Arg	19-45670677-T-C	1	6.2e-07	0	-11.47	0.9234	0.840962
95	rs1600285997	Trp39Gly	19-45670677-T-G	0.999	6.2e-07	0	-10.79	0.7572	0.822501
96	rs1967026576	Trp296Cys	19-45677743-G-T	1	6.2e-07	0	-12.57	0.9565	0.926622
97	rs1967232588	Phe394Leu	19-45681631-T-C	0.957	6.2e-07	0	-5.23	0.9356	0.966433
98	rs1967247063	Ile403Ser	19-45681742-T-G	0.964	6.21e-07	0.01	-4.12	0.6965	0.90468
99	rs1975737950	Arg169Ile	19-45674699-G-T	1	3.71747e-06	0	-7.65	0.9731	0.982251
100	rs1975739705	Ser179Phe	19-45674729-C-T	1	6.2e-07	0	-5.74	0.9823	0.983012
101	rs2146095934	Ile303Thr	19-45677763-T-C	1	1.23971e-06	0.01	-4.33	0.8756	0.841822
102	rs2513583656	Phe65Leu	19-45671307-C-G	0.999	1.2405e-06	0.02	-5.74	0.9913	0.863726
103	rs2513583714	Tyr68His	19-45671314-T-C	1	6.2e-07	0.01	-4.71	0.8855	0.828362
104	rs2513583724	Tyr68Cys	19-45671315-A-G	1	6.2e-07	0.01	-8.31	0.9706	0.81623
105	rs2513583779	Cys70Tyr	19-45671321-G-A	1	6.2e-07	0	-10.5	0.9807	0.952188
106	rs2513583779	Cys70Phe	19-45671321-G-T	0.999	1.24e-06	0	-10.5	0.9631	0.952891
107	rs2513584073	Cys84Tyr	19-45671363-G-A	0.999	1.24138e-06	0	-10.52	0.9916	0.994175
108	rs2513584175	Leu88Arg	19-45671375-T-G	0.995	6.23e-07	0	-5.74	0.8051	0.974065
109	rs2513598133	Tyr141Asn	19-45674110-T-A	1	6.2e-07	0	-8.6	0.6358	0.969635
110	rs2513598440	Leu152Arg	19-45674144-T-G	0.999	6.2e-07	0	-5.5	0.8928	0.961824
111	rs2513598491	Ala155Asp	19-45674153-C-A	1	1.24033e-06	0	-5.74	0.9404	0.974656
112	rs2513602133	Cys167Tyr	19-45674693-G-A	1	6.2e-07	0	-10.52	0.9138	0.986897
113	rs2513602163	Arg169Gly	19-45674698-A-G	1	6.2e-07	0	-6.69	0.8579	0.984909
114	rs2513602187	Asn170Ser	19-45674702-A-G	0.99	6.2e-07	0	-4.78	0.6453	0.938403
115	rs2513602263	Ile172Asn	19-45674708-T-A	1	1.23915e-06	0	-6.69	0.9629	0.973282
116	rs2513602339	Phe177Leu	19-45674722-T-C	1	6.2e-07	0	-5.74	0.9808	0.974873
117	rs2513602362	Phe177Ser	19-45674723-T-C	1	4.33705e-06	0	-7.65	0.97	0.982081
118	rs2513602370	Phe177Leu	19-45674724-C-G	1	6.2e-07	0	-5.74	0.9808	0.970217
119	rs2513602415	Phe180Ser	19-45674732-T-C	1	6.2e-07	0	-6.98	0.9274	0.936572
120	rs2513602681	Asp191Val	19-45674765-A-T	1	6.2e-07	0	-8.47	0.9242	0.985814
121	rs2513611729	Cys216Ser	19-45676961-T-A	0.999	6.2e-07	0	-9.12	0.926	0.987719
122	rs2513611729	Cys216Gly	19-45676961-T-G	0.999	6.2e-07	0	-10.68	0.79	0.989965
123	rs2513611950	Val227Glu	19-45676995-T-A	0.999	1.23913e-06	0	-5.59	0.7565	0.939694
124	rs2513612038	Asn230Lys	19-45677005-C-A	0.938	6.2e-07	0	-5.65	0.9728	0.967271
125	rs2513612124	Leu234Pro	19-45677016-T-C	1	3.71731e-06	0	-6.43	0.9645	0.966031
126	rs2513612176	Gly238Val	19-45677028-G-T	1	1.23966e-06	0	-7.88	0.8094	0.987907
127	rs2513612269	Leu241Arg	19-45677037-T-G	0.997	6.2e-07	0	-5.62	0.8195	0.980053
128	rs2513612624	Phe256Ser	19-45677082-T-C	1	6.2e-07	0.01	-6.64	0.5719	0.904925
129	rs2513614330	Phe270Cys	19-45677338-T-G	1	6.25e-07	0	-7.72	0.637	0.925726
130	rs2513614458	Arg278Gly	19-45677361-A-G	1	6.44e-07	0.01	-5.27	0.8805	0.908112
131	rs2513614598	Glu282Asp	19-45677375-G-C	0.999	6.42e-07	0	-2.95	0.5713	0.753959
132	rs2513616302	Cys286Trp	19-45677713-C-G	1	3.72224e-06	0	-10.63	0.9504	0.977801
133	rs2513616506	Ile298Thr	19-45677748-T-C	1	2.47903e-06	0.01	-4.83	0.9234	0.93565
134	rs2513617602	Ile317Thr	19-45677931-T-C	1	6.2e-07	0.01	-4.46	0.8224	0.893507
135	rs2513617602	Ile317Ser	19-45677931-T-G	1	6.2e-07	0	-5.57	0.7679	0.89975
136	rs2513618548	Leu339Gln	19-45678090-T-A	1	6.2e-07	0	-5.68	0.7336	0.961731
137	rs2513618664	Thr343Arg	19-45678102-C-G	1	1.86029e-06	0	-5.8	0.9066	0.950166
138	rs2513619296	Arg370Pro	19-45678183-G-C	1	6.28e-07	0.01	-6.54	0.5696	0.91197
139	rs2513619432	Ile378Asn	19-45678207-T-A	0.976	6.35e-07	0	-5.37	0.5978	0.893266
140	rs2513626256	Glu398Lys	19-45681643-G-A	0.931	1.23936e-06	0	-3.76	0.9039	0.95185

## Sheet: 7. REVEL ≥0.5 (104)
REVEL ≥0.5 (104)
Variants surviving this step (cumulative scores for all filters applied through this point).
No.	dbSNP rsID	Amino acid change	Variant (GRCh38)	PolyPhen-2	gnomAD AF	SIFT	PROVEAN	AlphaMissense	MetaRNN	REVEL
1	rs143490173	Asp66Gly	19-45671309-A-G	1	6.38823e-05	0	-6.5	0.8878	0.919765	0.905
2	rs201980985	Cys286Arg	19-45677711-T-C	1	3.10211e-06	0	-11.6	0.9711	0.921978	0.535
3	rs115338345	Arg101Pro	19-45672872-G-C	1	6.2e-07	0.01	-4.75	0.9753	0.97018	0.758
4	rs142528936	Val99Phe	19-45672865-G-T	1	3.47738e-05	0.02	-4.53	0.7079	0.81992	0.587
5	rs199583937	Arg183Pro	19-45674741-G-C	1	3.71793e-06	0.01	-6.04	0.9461	0.957327	0.522
6	rs199645877	Pro348Thr	19-45678116-C-A	1	1.24019e-06	0.03	-7.73	0.6195	0.967529	0.625
7	rs199645877	Pro348Ser	19-45678116-C-T	1	6.2e-07	0.04	-7.73	0.6853	0.969958	0.64
8	rs200089159	Gly351Cys	19-45678125-G-T	1	3.72069e-06	0	-8.7	0.8788	0.894354	0.706
9	rs367687469	Arg101Cys	19-45672871-C-T	1	7.44418e-05	0	-6.05	0.6523	0.91882	0.701
10	rs375231803	Glu237Ala	19-45677025-A-C	0.989	1.8588e-06	0	-5.75	0.9522	0.983809	0.768
11	rs546589322	Leu344Gln	19-45678105-T-A	1	6.2e-07	0	-5.8	0.8943	0.967113	0.593
12	rs546589322	Leu344Pro	19-45678105-T-C	1	8.68133e-06	0	-6.77	0.9506	0.964672	0.633
13	rs546589322	Leu344Arg	19-45678105-T-G	1	2.48038e-06	0	-5.8	0.8896	0.956035	0.601
14	rs557495616	Gly97Val	19-45672860-G-T	1	6.83747e-06	0.04	-7.06	0.8008	0.895584	0.614
15	rs577332018	Trp287Cys	19-45677716-G-C	1	2.10864e-05	0	-12.57	0.9927	0.953209	0.799
16	rs745643138	Trp233Arg	19-45677012-T-A	1	6.2e-07	0	-13.45	0.9924	0.990598	0.931
17	rs745643138	Trp233Arg	19-45677012-T-C	1	4.95675e-06	0	-13.45	0.9924	0.990522	0.931
18	rs746846121	Gly265Arg	19-45677108-G-A	1	8.05873e-06	0.01	-7.57	0.9555	0.991511	0.77
19	rs746846121	Gly265Arg	19-45677108-G-C	1	6.2e-07	0.01	-7.57	0.9555	0.992008	0.77
20	rs746846121	Gly265Trp	19-45677108-G-T	1	6.2e-07	0	-7.53	0.8036	0.988678	0.793
21	rs746894609	Gly144Ser	19-45674119-G-A	1	1.67324e-05	0	-5.73	0.7812	0.960222	0.943
22	rs748321836	Pro302Ala	19-45677759-C-G	1	6.2e-07	0	-6.83	0.7068	0.967847	0.577
23	rs748321836	Pro302Ser	19-45677759-C-T	1	3.09926e-06	0	-6.7	0.8515	0.956533	0.581
24	rs750730071	Gln224Pro	19-45676986-A-C	1	6.81501e-06	0.02	-5.21	0.7505	0.904697	0.663
25	rs754919812	Gly144Ala	19-45674120-G-C	1	8.67533e-06	0	-5.73	0.7807	0.978698	0.932
26	rs754919812	Gly144Val	19-45674120-G-T	1	6.2e-07	0	-8.6	0.9508	0.985523	0.937
27	rs755119848	Cys118Arg	19-45672922-T-C	1	8.68675e-06	0	-10.58	0.985	0.981236	0.791
28	rs761358733	Trp109Arg	19-45672895-T-C	1	1.23952e-06	0	-10.84	0.9858	0.972148	0.655
29	rs763016615	Asp191His	19-45674764-G-C	1	6.2e-07	0	-6.69	0.8914	0.983305	0.58
30	rs763800857	Trp287Arg	19-45677714-T-C	1	1.24046e-06	0	-13.53	0.978	0.99087	0.795
31	rs764159693	Val399Met	19-45681729-G-A	1	3.47562e-05	0	-2.82	0.8863	0.964557	0.507
32	rs766200229	Gly263Asp	19-45677103-G-A	1	8.3683e-05	0	-6.65	0.9823	0.961717	0.87
33	rs766200229	Gly263Ala	19-45677103-G-C	0.993	6.2e-07	0	-5.58	0.6728	0.976624	0.804
34	rs773245641	Pro302Arg	19-45677760-C-G	1	6.2e-07	0	-7.86	0.9716	0.98022	0.673
35	rs773245641	Pro302Leu	19-45677760-C-T	1	4.33869e-06	0	-8.59	0.8623	0.970719	0.519
36	rs773981009	Cys216Tyr	19-45676962-G-A	0.999	6.2e-07	0	-10.02	0.9296	0.988013	0.897
37	rs775596829	Asp66Asn	19-45671308-G-A	1	4.96134e-06	0	-4.45	0.8599	0.974769	0.791
38	rs778330895	Pro85Leu	19-45671366-C-T	1	1.24191e-05	0	-9.33	0.896	0.94961	0.764
39	rs779746611	Gly385Asp	19-45681605-G-A	1	6.2e-07	0	-6.77	0.9708	0.989527	0.926
40	rs779746611	Gly385Ala	19-45681605-G-C	1	6.2e-07	0	-5.7	0.891	0.947249	0.865
41	rs779746611	Gly385Val	19-45681605-G-T	1	6.2e-07	0	-8.47	0.9059	0.990028	0.934
42	rs779781285	Trp264Cys	19-45677107-G-C	1	7.43903e-06	0	-12.17	0.9746	0.967549	0.701
43	rs781700423	Leu318Arg	19-45677934-T-G	0.999	8.05455e-06	0	-5.23	0.5881	0.943313	0.551
44	rs893921559	Tyr87Asp	19-45671371-T-G	0.99	6.21461e-06	0	-9.26	0.9657	0.890031	0.687
45	rs909594604	Arg338Met	19-45677994-G-T	1	7.43693e-06	0	-5.77	0.7843	0.721955	0.539
46	rs951907131	Tyr225Asn	19-45676988-T-A	1	6.2e-07	0	-8.67	0.9271	0.941125	0.709
47	rs951907131	Tyr225His	19-45676988-T-C	1	1.23917e-06	0	-4.83	0.9564	0.91813	0.753
48	rs951907131	Tyr225Asp	19-45676988-T-G	1	6.2e-07	0	-9.58	0.9811	0.940575	0.719
49	rs1194857545	Glu282Gly	19-45677374-A-G	1	1.2626e-06	0	-6.88	0.6399	0.882074	0.506
50	rs1207653012	Glu398Asp	19-45681645-G-C	0.964	1.23928e-06	0	-2.86	0.7473	0.935037	0.654
51	rs1208334112	Gly263Arg	19-45677102-G-C	1	9.91631e-06	0	-7.62	0.9743	0.989289	0.896
52	rs1213046506	Trp90Arg	19-45671380-T-C	1	6.24e-07	0	-12.92	0.943	0.925966	0.504
53	rs1241110746	Pro267Ser	19-45677328-C-T	1	6.29e-07	0	-7.87	0.6642	0.986461	0.891
54	rs1242475885	Leu325Pro	19-45677955-T-C	1	6.2e-07	0	-6.55	0.6353	0.962693	0.519
55	rs1268894911	Val399Ala	19-45681730-T-C	1	6.21e-07	0	-3.75	0.8496	0.939169	0.582
56	rs1269105159	Ser342Tyr	19-45678099-C-A	0.999	3.1009e-06	0	-5.5	0.7389	0.870977	0.586
57	rs1271429083	Leu165Gln	19-45674687-T-A	1	6.2e-07	0	-5.64	0.7171	0.985688	0.604
58	rs1281459393	Cys61Trp	19-45671295-T-G	1	1.24189e-06	0	-10.52	0.9821	0.992819	0.886
59	rs1302808260	Pro348His	19-45678117-C-A	1	6.2e-07	0.01	-8.7	0.9343	0.969375	0.576
60	rs1302860359	Cys393Trp	19-45681630-C-G	1	6.2e-07	0.02	-9.99	0.9611	0.979328	0.72
61	rs1310737721	Cys70Trp	19-45671322-C-G	1	6.2e-07	0	-10.48	0.976	0.931502	0.676
62	rs1341422602	Phe65Ser	19-45671306-T-C	1	6.2e-07	0	-7.65	0.9304	0.944781	0.663
63	rs1342003668	Leu147Pro	19-45674129-T-C	1	2.47874e-06	0.02	-5.81	0.7705	0.97181	0.544
64	rs1364507294	Tyr392His	19-45681625-T-C	1	1.23922e-06	0	-4.78	0.916	0.936164	0.509
65	rs1368040383	Thr142Ile	19-45674114-C-T	1	7.43605e-06	0	-5.64	0.6494	0.937451	0.517
66	rs1405223050	Ile299Lys	19-45677751-T-A	1	6.2e-07	0	-6.08	0.9495	0.933102	0.562
67	rs1405223050	Ile299Thr	19-45677751-T-C	1	4.33807e-06	0.01	-4.35	0.8758	0.914728	0.565
68	rs1407447389	Ser382Thr	19-45678218-T-A	0.989	7.03061e-06	0	-2.9	0.6867	0.969057	0.527
69	rs1457848658	Ser382Tyr	19-45678219-C-A	1	5.11296e-06	0	-5.83	0.9675	0.976712	0.642
70	rs1457848658	Ser382Cys	19-45678219-C-G	1	1.91736e-06	0	-4.9	0.5962	0.971094	0.608
71	rs1475472835	Pro267Leu	19-45677329-C-T	1	6.29e-07	0	-9.83	0.8243	0.942974	0.785
72	rs1490770455	Gly265Glu	19-45677323-G-A	1	6.32e-07	0.01	-7.57	0.9065	0.988675	0.74
73	rs1967026576	Trp296Cys	19-45677743-G-T	1	6.2e-07	0	-12.57	0.9565	0.926622	0.567
74	rs1967247063	Ile403Ser	19-45681742-T-G	0.964	6.21e-07	0.01	-4.12	0.6965	0.90468	0.65
75	rs1975737950	Arg169Ile	19-45674699-G-T	1	3.71747e-06	0	-7.65	0.9731	0.982251	0.539
76	rs1975739705	Ser179Phe	19-45674729-C-T	1	6.2e-07	0	-5.74	0.9823	0.983012	0.547
77	rs2513583714	Tyr68His	19-45671314-T-C	1	6.2e-07	0.01	-4.71	0.8855	0.828362	0.562
78	rs2513583779	Cys70Tyr	19-45671321-G-A	1	6.2e-07	0	-10.5	0.9807	0.952188	0.881
79	rs2513583779	Cys70Phe	19-45671321-G-T	0.999	1.24e-06	0	-10.5	0.9631	0.952891	0.88
80	rs2513584073	Cys84Tyr	19-45671363-G-A	0.999	1.24138e-06	0	-10.52	0.9916	0.994175	0.966
81	rs2513584175	Leu88Arg	19-45671375-T-G	0.995	6.23e-07	0	-5.74	0.8051	0.974065	0.768
82	rs2513598133	Tyr141Asn	19-45674110-T-A	1	6.2e-07	0	-8.6	0.6358	0.969635	0.596
83	rs2513598440	Leu152Arg	19-45674144-T-G	0.999	6.2e-07	0	-5.5	0.8928	0.961824	0.538
84	rs2513598491	Ala155Asp	19-45674153-C-A	1	1.24033e-06	0	-5.74	0.9404	0.974656	0.577
85	rs2513602133	Cys167Tyr	19-45674693-G-A	1	6.2e-07	0	-10.52	0.9138	0.986897	0.666
86	rs2513602263	Ile172Asn	19-45674708-T-A	1	1.23915e-06	0	-6.69	0.9629	0.973282	0.64
87	rs2513602339	Phe177Leu	19-45674722-T-C	1	6.2e-07	0	-5.74	0.9808	0.974873	0.546
88	rs2513602415	Phe180Ser	19-45674732-T-C	1	6.2e-07	0	-6.98	0.9274	0.936572	0.538
89	rs2513602681	Asp191Val	19-45674765-A-T	1	6.2e-07	0	-8.47	0.9242	0.985814	0.577
90	rs2513611729	Cys216Ser	19-45676961-T-A	0.999	6.2e-07	0	-9.12	0.926	0.987719	0.922
91	rs2513611729	Cys216Gly	19-45676961-T-G	0.999	6.2e-07	0	-10.68	0.79	0.989965	0.932
92	rs2513611950	Val227Glu	19-45676995-T-A	0.999	1.23913e-06	0	-5.59	0.7565	0.939694	0.612
93	rs2513612124	Leu234Pro	19-45677016-T-C	1	3.71731e-06	0	-6.43	0.9645	0.966031	0.731
94	rs2513612176	Gly238Val	19-45677028-G-T	1	1.23966e-06	0	-7.88	0.8094	0.987907	0.676
95	rs2513612269	Leu241Arg	19-45677037-T-G	0.997	6.2e-07	0	-5.62	0.8195	0.980053	0.653
96	rs2513614330	Phe270Cys	19-45677338-T-G	1	6.25e-07	0	-7.72	0.637	0.925726	0.534
97	rs2513616302	Cys286Trp	19-45677713-C-G	1	3.72224e-06	0	-10.63	0.9504	0.977801	0.655
98	rs2513616506	Ile298Thr	19-45677748-T-C	1	2.47903e-06	0.01	-4.83	0.9234	0.93565	0.597
99	rs2513617602	Ile317Thr	19-45677931-T-C	1	6.2e-07	0.01	-4.46	0.8224	0.893507	0.559
100	rs2513617602	Ile317Ser	19-45677931-T-G	1	6.2e-07	0	-5.57	0.7679	0.89975	0.558
101	rs2513618548	Leu339Gln	19-45678090-T-A	1	6.2e-07	0	-5.68	0.7336	0.961731	0.584
102	rs2513618664	Thr343Arg	19-45678102-C-G	1	1.86029e-06	0	-5.8	0.9066	0.950166	0.554
103	rs2513619296	Arg370Pro	19-45678183-G-C	1	6.28e-07	0.01	-6.54	0.5696	0.91197	0.597
104	rs2513626256	Glu398Lys	19-45681643-G-A	0.931	1.23936e-06	0	-3.76	0.9039	0.95185	0.715

## Sheet: 8. mCSM-memb pathogenic (79)
mCSM-memb pathogenic (79)
Variants surviving this step (cumulative scores for all filters applied through this point).
No.	dbSNP rsID	Amino acid change	Variant (GRCh38)	PolyPhen-2	gnomAD AF	SIFT	PROVEAN	AlphaMissense	MetaRNN	REVEL	mCSM-membrane pathogenicity
1	rs143490173	Asp66Gly	19-45671309-A-G	1	6.38823e-05	0	-6.5	0.8878	0.919765	0.905	Pathogenic
2	rs201980985	Cys286Arg	19-45677711-T-C	1	3.10211e-06	0	-11.6	0.9711	0.921978	0.535	Pathogenic
3	rs115338345	Arg101Pro	19-45672872-G-C	1	6.2e-07	0.01	-4.75	0.9753	0.97018	0.758	Pathogenic
4	rs199583937	Arg183Pro	19-45674741-G-C	1	3.71793e-06	0.01	-6.04	0.9461	0.957327	0.522	Pathogenic
5	rs199645877	Pro348Thr	19-45678116-C-A	1	1.24019e-06	0.03	-7.73	0.6195	0.967529	0.625	Pathogenic
6	rs199645877	Pro348Ser	19-45678116-C-T	1	6.2e-07	0.04	-7.73	0.6853	0.969958	0.64	Pathogenic
7	rs200089159	Gly351Cys	19-45678125-G-T	1	3.72069e-06	0	-8.7	0.8788	0.894354	0.706	Pathogenic
8	rs367687469	Arg101Cys	19-45672871-C-T	1	7.44418e-05	0	-6.05	0.6523	0.91882	0.701	Pathogenic
9	rs546589322	Leu344Gln	19-45678105-T-A	1	6.2e-07	0	-5.8	0.8943	0.967113	0.593	Pathogenic
10	rs546589322	Leu344Pro	19-45678105-T-C	1	8.68133e-06	0	-6.77	0.9506	0.964672	0.633	Pathogenic
11	rs546589322	Leu344Arg	19-45678105-T-G	1	2.48038e-06	0	-5.8	0.8896	0.956035	0.601	Pathogenic
12	rs557495616	Gly97Val	19-45672860-G-T	1	6.83747e-06	0.04	-7.06	0.8008	0.895584	0.614	Pathogenic
13	rs577332018	Trp287Cys	19-45677716-G-C	1	2.10864e-05	0	-12.57	0.9927	0.953209	0.799	Pathogenic
14	rs745643138	Trp233Arg	19-45677012-T-A	1	6.2e-07	0	-13.45	0.9924	0.990598	0.931	Pathogenic
15	rs745643138	Trp233Arg	19-45677012-T-C	1	4.95675e-06	0	-13.45	0.9924	0.990522	0.931	Pathogenic
16	rs746846121	Gly265Arg	19-45677108-G-A	1	8.05873e-06	0.01	-7.57	0.9555	0.991511	0.77	Pathogenic
17	rs746846121	Gly265Arg	19-45677108-G-C	1	6.2e-07	0.01	-7.57	0.9555	0.992008	0.77	Pathogenic
18	rs746846121	Gly265Trp	19-45677108-G-T	1	6.2e-07	0	-7.53	0.8036	0.988678	0.793	Pathogenic
19	rs750730071	Gln224Pro	19-45676986-A-C	1	6.81501e-06	0.02	-5.21	0.7505	0.904697	0.663	Pathogenic
20	rs754919812	Gly144Val	19-45674120-G-T	1	6.2e-07	0	-8.6	0.9508	0.985523	0.937	Pathogenic
21	rs755119848	Cys118Arg	19-45672922-T-C	1	8.68675e-06	0	-10.58	0.985	0.981236	0.791	Pathogenic
22	rs761358733	Trp109Arg	19-45672895-T-C	1	1.23952e-06	0	-10.84	0.9858	0.972148	0.655	Pathogenic
23	rs763016615	Asp191His	19-45674764-G-C	1	6.2e-07	0	-6.69	0.8914	0.983305	0.58	Pathogenic
24	rs763800857	Trp287Arg	19-45677714-T-C	1	1.24046e-06	0	-13.53	0.978	0.99087	0.795	Pathogenic
25	rs766200229	Gly263Asp	19-45677103-G-A	1	8.3683e-05	0	-6.65	0.9823	0.961717	0.87	Pathogenic
26	rs773245641	Pro302Arg	19-45677760-C-G	1	6.2e-07	0	-7.86	0.9716	0.98022	0.673	Pathogenic
27	rs773245641	Pro302Leu	19-45677760-C-T	1	4.33869e-06	0	-8.59	0.8623	0.970719	0.519	Pathogenic
28	rs773981009	Cys216Tyr	19-45676962-G-A	0.999	6.2e-07	0	-10.02	0.9296	0.988013	0.897	Pathogenic
29	rs778330895	Pro85Leu	19-45671366-C-T	1	1.24191e-05	0	-9.33	0.896	0.94961	0.764	Pathogenic
30	rs779746611	Gly385Asp	19-45681605-G-A	1	6.2e-07	0	-6.77	0.9708	0.989527	0.926	Pathogenic
31	rs779746611	Gly385Val	19-45681605-G-T	1	6.2e-07	0	-8.47	0.9059	0.990028	0.934	Pathogenic
32	rs779781285	Trp264Cys	19-45677107-G-C	1	7.43903e-06	0	-12.17	0.9746	0.967549	0.701	Pathogenic
33	rs781700423	Leu318Arg	19-45677934-T-G	0.999	8.05455e-06	0	-5.23	0.5881	0.943313	0.551	Pathogenic
34	rs893921559	Tyr87Asp	19-45671371-T-G	0.99	6.21461e-06	0	-9.26	0.9657	0.890031	0.687	Pathogenic
35	rs909594604	Arg338Met	19-45677994-G-T	1	7.43693e-06	0	-5.77	0.7843	0.721955	0.539	Pathogenic
36	rs951907131	Tyr225Asn	19-45676988-T-A	1	6.2e-07	0	-8.67	0.9271	0.941125	0.709	Pathogenic
37	rs951907131	Tyr225Asp	19-45676988-T-G	1	6.2e-07	0	-9.58	0.9811	0.940575	0.719	Pathogenic
38	rs1194857545	Glu282Gly	19-45677374-A-G	1	1.2626e-06	0	-6.88	0.6399	0.882074	0.506	Pathogenic
39	rs1208334112	Gly263Arg	19-45677102-G-C	1	9.91631e-06	0	-7.62	0.9743	0.989289	0.896	Pathogenic
40	rs1213046506	Trp90Arg	19-45671380-T-C	1	6.24e-07	0	-12.92	0.943	0.925966	0.504	Pathogenic
41	rs1242475885	Leu325Pro	19-45677955-T-C	1	6.2e-07	0	-6.55	0.6353	0.962693	0.519	Pathogenic
42	rs1269105159	Ser342Tyr	19-45678099-C-A	0.999	3.1009e-06	0	-5.5	0.7389	0.870977	0.586	Pathogenic
43	rs1271429083	Leu165Gln	19-45674687-T-A	1	6.2e-07	0	-5.64	0.7171	0.985688	0.604	Pathogenic
44	rs1281459393	Cys61Trp	19-45671295-T-G	1	1.24189e-06	0	-10.52	0.9821	0.992819	0.886	Pathogenic
45	rs1302808260	Pro348His	19-45678117-C-A	1	6.2e-07	0.01	-8.7	0.9343	0.969375	0.576	Pathogenic
46	rs1302860359	Cys393Trp	19-45681630-C-G	1	6.2e-07	0.02	-9.99	0.9611	0.979328	0.72	Pathogenic
47	rs1310737721	Cys70Trp	19-45671322-C-G	1	6.2e-07	0	-10.48	0.976	0.931502	0.676	Pathogenic
48	rs1342003668	Leu147Pro	19-45674129-T-C	1	2.47874e-06	0.02	-5.81	0.7705	0.97181	0.544	Pathogenic
49	rs1405223050	Ile299Lys	19-45677751-T-A	1	6.2e-07	0	-6.08	0.9495	0.933102	0.562	Pathogenic
50	rs1457848658	Ser382Tyr	19-45678219-C-A	1	5.11296e-06	0	-5.83	0.9675	0.976712	0.642	Pathogenic
51	rs1475472835	Pro267Leu	19-45677329-C-T	1	6.29e-07	0	-9.83	0.8243	0.942974	0.785	Pathogenic
52	rs1490770455	Gly265Glu	19-45677323-G-A	1	6.32e-07	0.01	-7.57	0.9065	0.988675	0.74	Pathogenic
53	rs1967026576	Trp296Cys	19-45677743-G-T	1	6.2e-07	0	-12.57	0.9565	0.926622	0.567	Pathogenic
54	rs1967247063	Ile403Ser	19-45681742-T-G	0.964	6.21e-07	0.01	-4.12	0.6965	0.90468	0.65	Pathogenic
55	rs1975737950	Arg169Ile	19-45674699-G-T	1	3.71747e-06	0	-7.65	0.9731	0.982251	0.539	Pathogenic
56	rs1975739705	Ser179Phe	19-45674729-C-T	1	6.2e-07	0	-5.74	0.9823	0.983012	0.547	Pathogenic
57	rs2513583714	Tyr68His	19-45671314-T-C	1	6.2e-07	0.01	-4.71	0.8855	0.828362	0.562	Pathogenic
58	rs2513583779	Cys70Tyr	19-45671321-G-A	1	6.2e-07	0	-10.5	0.9807	0.952188	0.881	Pathogenic
59	rs2513583779	Cys70Phe	19-45671321-G-T	0.999	1.24e-06	0	-10.5	0.9631	0.952891	0.88	Pathogenic
60	rs2513584073	Cys84Tyr	19-45671363-G-A	0.999	1.24138e-06	0	-10.52	0.9916	0.994175	0.966	Pathogenic
61	rs2513584175	Leu88Arg	19-45671375-T-G	0.995	6.23e-07	0	-5.74	0.8051	0.974065	0.768	Pathogenic
62	rs2513598133	Tyr141Asn	19-45674110-T-A	1	6.2e-07	0	-8.6	0.6358	0.969635	0.596	Pathogenic
63	rs2513598440	Leu152Arg	19-45674144-T-G	0.999	6.2e-07	0	-5.5	0.8928	0.961824	0.538	Pathogenic
64	rs2513598491	Ala155Asp	19-45674153-C-A	1	1.24033e-06	0	-5.74	0.9404	0.974656	0.577	Pathogenic
65	rs2513602133	Cys167Tyr	19-45674693-G-A	1	6.2e-07	0	-10.52	0.9138	0.986897	0.666	Pathogenic
66	rs2513602263	Ile172Asn	19-45674708-T-A	1	1.23915e-06	0	-6.69	0.9629	0.973282	0.64	Pathogenic
67	rs2513602415	Phe180Ser	19-45674732-T-C	1	6.2e-07	0	-6.98	0.9274	0.936572	0.538	Pathogenic
68	rs2513602681	Asp191Val	19-45674765-A-T	1	6.2e-07	0	-8.47	0.9242	0.985814	0.577	Pathogenic
69	rs2513611729	Cys216Gly	19-45676961-T-G	0.999	6.2e-07	0	-10.68	0.79	0.989965	0.932	Pathogenic
70	rs2513611950	Val227Glu	19-45676995-T-A	0.999	1.23913e-06	0	-5.59	0.7565	0.939694	0.612	Pathogenic
71	rs2513612124	Leu234Pro	19-45677016-T-C	1	3.71731e-06	0	-6.43	0.9645	0.966031	0.731	Pathogenic
72	rs2513612176	Gly238Val	19-45677028-G-T	1	1.23966e-06	0	-7.88	0.8094	0.987907	0.676	Pathogenic
73	rs2513612269	Leu241Arg	19-45677037-T-G	0.997	6.2e-07	0	-5.62	0.8195	0.980053	0.653	Pathogenic
74	rs2513614330	Phe270Cys	19-45677338-T-G	1	6.25e-07	0	-7.72	0.637	0.925726	0.534	Pathogenic
75	rs2513616302	Cys286Trp	19-45677713-C-G	1	3.72224e-06	0	-10.63	0.9504	0.977801	0.655	Pathogenic
76	rs2513617602	Ile317Ser	19-45677931-T-G	1	6.2e-07	0	-5.57	0.7679	0.89975	0.558	Pathogenic
77	rs2513618548	Leu339Gln	19-45678090-T-A	1	6.2e-07	0	-5.68	0.7336	0.961731	0.584	Pathogenic
78	rs2513618664	Thr343Arg	19-45678102-C-G	1	1.86029e-06	0	-5.8	0.9066	0.950166	0.554	Pathogenic
79	rs2513619296	Arg370Pro	19-45678183-G-C	1	6.28e-07	0.01	-6.54	0.5696	0.91197	0.597	Pathogenic

[truncated: 1 more sheets: 9. Final 14]
