# Supplementary material
Source: Research Square preprint supplement (doi:10.21203/rs.3.rs-10159812/v1)
Supplement: Supplementary file 1 [file c4a6b97479ebd24752a2356a.docx]

**S1 Table.** Genomic annotation of the 14 variants (GRCh38 assembly), listed by residue position.

| **Variant** | **dbSNP rsID** | **Genomic variant (chr-pos-ref-alt)** | **Nucleotide change** | **Codon change** |
| --- | --- | --- | --- | --- |
| Y141N | rs2513598133 | 19-45674110-T-A | T>A | TAC→AAC |
| G144V | rs754919812 | 19-45674120-G-T | G>T | GGC→GTC |
| L152R | rs2513598440 | 19-45674144-T-G | T>G | CTG→CGG |
| S179F | rs1975739705 | 19-45674729-C-T | C>T | TCT→TTT |
| Q224P | rs750730071 | 19-45676986-A-C | A>C | CAG→CCG |
| G238V | rs2513612176 | 19-45677028-G-T | G>T | GGC→GTC |
| L241R | rs2513612269 | 19-45677037-T-G | T>G | CTG→CGG |
| P302L | rs773245641 | 19-45677760-C-T | C>T | CCC→CTC |
| P302R | rs773245641 | 19-45677760-C-G | C>G | CCC→CGC |
| L318R | rs781700423 | 19-45677934-T-G | T>G | CTT→CGT |
| L344Q | rs546589322 | 19-45678105-T-A | T>A | CTG→CAG |
| L344R | rs546589322 | 19-45678105-T-G | T>G | CTG→CGG |
| P348H | rs1302808260 | 19-45678117-C-A | C>A | CCC→CAC |
| G385V | rs779746611 | 19-45681605-G-T | G>T | GGC→GTC |

Coordinates are given for the GRCh38 assembly. Two pairs of variants (P302L/P302R and L344Q/L344R) arise from multi-allelic sites and therefore share a dbSNP rsID.
